# Supplementary material for: Comparative genomic analysis revealed rapid differentiation in the pathogenicity-related gene repertoires between Pyricularia oryzae and Pyricularia penniseti isolated from a Pennisetum grass
Source: BMC Genomics. 2018 Dec 13;19:927. doi: 10.1186/s12864-018-5222-8 (PMC6293661; doi:10.1186/s12864-018-5222-8)
Supplement: Supplementary file 1 — Figure S1. Gene copy numbers of CAZymes in Botrytis cinereal, Colletotrichum gloeosporioides, Fusarium graminearum, Neurospora crassa, Sclerotinia sclerotiorum, Trichoderma reesei and Ustilago maydis as well as Pyricularia isolates collected from O. sativa (PoOs), T. aestivum (PoTa), D. sanguinalis (PgDs), S. viridis (PoSv), and E. indica (PoEi). Log2 Copy Number presents variation of copy number with increased red color means increased number of CAZymes. (XLSX 20 kb) [file 12864_2018_5222_MOESM1_ESM.xlsx]

## Sheet: Sheet1
PHI	P1609
2315|PHI:2315|ChLae1|G4XKY9|5016|Cochliobolus heterostrophus|Mixed outcome, 482|PHI:482|LAEA|AAR01218|5085|Aspergillus fumigatus|Reduced virulence	P1609_10502, P1609_1172, P1609_1173, P1609_12199, P1609_12213, P1609_12384, P1609_12524, P1609_12852, P1609_1693, P1609_1988, P1609_2289, P1609_2591, P1609_3613, P1609_6565, P1609_829, P1609_8647, P1609_9367
871|PHI:871|MGG_12656|EDK01997|318829|Magnaporthe oryzae|Reduced virulence, 876|PHI:876|MGG_11671|EDK03349|318829|Magnaporthe oryzae|Reduced virulence	P1609_10304, P1609_10394, P1609_10395, P1609_10432, P1609_10433, P1609_10843, P1609_10844, P1609_11128, P1609_11129, P1609_11164, P1609_11428, P1609_11589, P1609_11590, P1609_11661, P1609_11817, P1609_11818, P1609_11944, P1609_11978, P1609_121, P1609_12243, P1609_12244, P1609_12265, P1609_12317, P1609_12318, P1609_12446, P1609_12535, P1609_12594, P1609_12595, P1609_12633, P1609_12634, P1609_12649…
2379|PHI:2379|DEP5|D2E9X0|29001|Alternaria brassicicola|Mixed outcome, 255|PHI:255|FUM1 (related: FUM5)|AAD43562|5127|Gibberella moniliformis|Unaffected pathogenicity, 3299 | patK | PHI:3299 | A0A075TRC0 | 27334 | Penicillium expansum | unaffected pathogenicity, 3324 | SN477 | PHI:3324 | Q0V687 | 13684 | Parastagonospora nodorum | unaffected pathogenicity, 3387 | FVEG_12523 | PHI:3387 | W7MT31 | …	P1609_10568, P1609_11386, P1609_11524, P1609_11866, P1609_1537, P1609_2887, P1609_4367, P1609_4423, P1609_5026, P1609_5553, P1609_6083, P1609_8173, P1609_9812
601|PHI:601|orf48|AAL20303|216597|Salmonella enterica|Unaffected pathogenicity	P1609_11611, P1609_12196, P1609_12232, P1609_12379, P1609_12849, P1609_13001, P1609_2388, P1609_2899, P1609_5709, P1609_5732, P1609_9849
1161|PHI:1161|MgMfs1|A4ZGP3|54734|Mycosphaerella graminicola (related: Zymoseptoria triticii)|Chemistry target, 2731|PHI:2731|VdSge1|G2XD29|27337|Verticillium dahliae|Loss of pathogenicity, 544|PHI:544|BCMFS1|AAF64435|332648|Botrytis cinerea|Unaffected pathogenicity, 60|PHI:60|TOXA|AAB36607|5017|Cochliobolus carbonum|Lethal	P1609_11476, P1609_1399, P1609_5038, P1609_7232, P1609_7309, P1609_910, P1609_9207, P1609_9901
1030|PHI:1030|bcatrA|CAA93142|40559|Botrytis cinerea|Unaffected pathogenicity, 1159|PHI:1159|MgAtr7|A5H456|54734|Mycosphaerella graminicola (related: Zymoseptoria triticii)|Chemistry target, 1160|PHI:1160|BcatrB||40559|Botrytis cinerea|Chemistry target, 132|PHI:132|ABC1|AAB86640|318829|Magnaporthe oryzae|Reduced virulence, 202|PHI:202|BcatrB|CAB52402|40559|Botrytis cinerea|Reduced virulence, 2309…	P1609_4562, P1609_7227, P1609_8393, P1609_9910
2290|PHI:2290|BcBOA6|B1GVX7|40559|Botrytis cinerea|Reduced virulence, 325|PHI:325|ACE1|CAG28797|318829|Magnaporthe oryzae|Effector (plant avirulence determinant), 724|PHI:724|PKS9|AAS57293|5518|Fusarium graminearum|Unaffected pathogenicity	P1609_11711, P1609_4434, P1609_4485, P1609_4870, P1609_7209, P1609_7225, P1609_7316, P1609_8143, P1609_9326, P1609_9329, P1609_9343
191|PHI:191|TOM1|AAB08446|39703|Septoria lycopersici|Unaffected pathogenicity, 24|PHI:24|Avenacinase gene|AAB09777|29850|Gaeumannomyces graminis|Loss of pathogenicity, 748|PHI:748|um00446|Not available|5270|Ustilago maydis|Unaffected pathogenicity	P1609_10190, P1609_1514, P1609_3220, P1609_3497, P1609_4864, P1609_5447, P1609_5658, P1609_6851, P1609_7538, P1609_9386
1046|PHI:1046|CTB5|ABK64182|29003|Cercospora nicotianae|Reduced virulence	P1609_12198, P1609_12234, P1609_12311, P1609_12549, P1609_12589, P1609_12750, P1609_12851, P1609_2268, P1609_2282, P1609_5587, P1609_5688
1008|PHI:1008|NPS6|ABI51982|101162|Cochliobolus miyabeanus|Reduced virulence, 1009|PHI:1009|NPS6|ABI51983|29001|Alternaria brassicicola|Reduced virulence, 12|PHI:12|HTS1|AAA33023|5017|Cochliobolus carbonum|Loss of pathogenicity, 160|PHI:160|AMT|AAF01762|5599|Alternaria alternata|Loss of pathogenicity, 2049|PHI:2049|SSM2|A9YX63|148305|Magnaporthe oryzae (related: Magnaporthe grisea)|Reduced virule…	P1609_11172, P1609_12111, P1609_127, P1609_13048, P1609_4700, P1609_5039, P1609_5874, P1609_709, P1609_8194, P1609_9370, P1609_9902
1018|PHI:1018|ABC3|AAZ81480|318829|Magnaporthe oryzae|Loss of pathogenicity, 2042|PHI:2042|ABC3|Q3Y5V5|148305|Magnaporthe oryzae (related: Magnaporthe grisea)|Loss of pathogenicity	P1609_10195, P1609_10570, P1609_11372, P1609_12105, P1609_4574, P1609_7437, P1609_8075, P1609_999
812|PHI:812|MGG_10702|EDJ94108|318829|Magnaporthe oryzae|Reduced virulence	P1609_1191, P1609_12498, P1609_1789, P1609_4801, P1609_6751
922|PHI:922|um03615||5270|Ustilago maydis|Unaffected pathogenicity	P1609_1084, P1609_11420, P1609_11892, P1609_123, P1609_6921, P1609_7314
438|PHI:438|BcBOT1 (related: CND5)|AAQ16576|40559|Botrytis cinerea|Reduced virulence	P1609_10456, P1609_10505, P1609_2486, P1609_3937, P1609_3969, P1609_5672, P1609_9985
107|PHI:107|CEK1|EAK96519|5476|Candida albicans|Reduced virulence, 1189|PHI:1189|(Gpmk1)|I1RQN9|5518|Gibberella zeae (related: Fusarium graminearum)|Reduced virulence, 142|PHI:142|CHK1|AAF05913|5016|Cochliobolus heterostrophus|Reduced virulence, 151|PHI:151|KPP2|AAF15528|5270|Ustilago maydis|Reduced virulence, 161|PHI:161|BMP1|AAG23132|40559|Botrytis cinerea|Loss of pathogenicity, 170|PHI:170|CMK…	P1609_6299
397|PHI:397|LAC2|AAV64894|5207|Cryptococcus neoformans|Unaffected pathogenicity, 48|PHI:48|CnLAC1|BAD91825|5207|Cryptococcus neoformans|Reduced virulence, 552|PHI:552|BcLCC2|AAK77953|40559|Botrytis cinerea|Unaffected pathogenicity	P1609_1657, P1609_28, P1609_6800, P1609_8246, P1609_8515, P1609_9391, P1609_9821
1149|PHI:1149|cyp51/erg11|B6E218|54734|Mycosphaerella graminicola (related: Zymoseptoria triticii)|Chemistry target, 1150|PHI:1150|cyp51/erg11|B6E221|54734|Mycosphaerella graminicola (related: Zymoseptoria triticii)|Chemistry target, 1151|PHI:1151|cyp51/erg11|B6E218|54734|Mycosphaerella graminicola (related: Zymoseptoria triticii)|Chemistry target, 1152|PHI:1152|cyp51/erg11|B6E223|54734|Mycosphae…	P1609_262
716|PHI:716|ZEB1|ABB90284|5518|Fusarium graminearum|Unaffected pathogenicity	P1609_2557, P1609_2944, P1609_4872, P1609_5619
2022|PHI:2022|BUF1|MGG_02252|148305|Magnaporthe oryzae (related: Magnaporthe grisea)|Loss of pathogenicity, 2312|PHI:2312|THR|O93802|5530|Metarhizium anisopliae|Increased virulence (Hypervirulence), 2802|PHI:2802|3hnr|B2ZRQ4|93612|Setosphaeria turcica|Unaffected pathogenicity, 2837|PHI:2837|OXI1|D2SZX7|5016|Cochliobolus heterostrophus|Reduced virulence, 2844|PHI:2844|BRM2|O93802|5599|Alternaria a…	P1609_1959, P1609_8241, P1609_8, P1609_9126
817|PHI:817|MGG_12252|EDK03444|318829|Magnaporthe oryzae|Reduced virulence	P1609_10276, P1609_10391, P1609_11001, P1609_12170, P1609_12180, P1609_12255, P1609_12572, P1609_2185, P1609_2332, P1609_4038, P1609_5907, P1609_9248, P1609_9324, P1609_9325
2393|PHI:2393|Related to O-methylsterigmatocystin oxidoreductase|I1R980|5518|Gibberella zeae (related: Fusarium graminearum)|Increased virulence (Hypervirulence)	P1609_4006, P1609_9460
101|PHI:101|ALB1|AAC39471|5085|Aspergillus fumigatus|Reduced virulence, 116|PHI:116|PKSP|CAA76740|5085|Aspergillus fumigatus|Reduced virulence, 2260|PHI:2260|PKS1|G8DNT0|45130|Cochliobolus sativus|Unaffected pathogenicity, 2311|PHI:2311|PKS|F8R4Y0|5530|Metarhizium anisopliae|Increased virulence (Hypervirulence), 238|PHI:238|WdPKS1|AAD31436|5970|Wangiella (Exophiala) dermatitidis|Reduced virulence…	P1609_125, P1609_1962, P1609_4985, P1609_6752, P1609_6
2341|PHI:2341|BeNEP1|Q0E7H5|278938|Botrytis elliptica|Unaffected pathogenicity, 2342|PHI:2342|BeNEP2|Q0E7H7|278938|Botrytis elliptica|Unaffected pathogenicity, 2711|PHI:2711|NLP1|G2X3W4|27337|Verticillium dahliae|Reduced virulence, 2712|PHI:2712|NLP2|G2WWK9|27337|Verticillium dahliae|Reduced virulence, 3128 | MpNEP2 | PHI:3128 | A5H7H0 | 153609 | Moniliophthora perniciosa | increased virulence, 6…	P1609_11807, P1609_7334, P1609_8358
1047|PHI:1047|CTB6|ABK64183|29003|Cercospora nicotianae|Reduced virulence	P1609_3973, P1609_5138, P1609_5618
2357|PHI:2357|CYP52X1|E2EAF6|475271|Beauveria bassiana|Reduced virulence	P1609_2779, P1609_4425, P1609_6670, P1609_691, P1609_7447, P1609_7703
1520|PHI:1520|GzHOMEL024|I1RWS3|5518|Gibberella zeae (related: Fusarium graminearum)|Unaffected pathogenicity, 1527|PHI:1527|GzHOMEL040|I1S9A1|5518|Gibberella zeae (related: Fusarium graminearum)|Lethal	P1609_10287, P1609_10477, P1609_11252, P1609_11507, P1609_11624, P1609_11643, P1609_11819, P1609_12302, P1609_12306, P1609_12324, P1609_12353, P1609_12400, P1609_12582, P1609_12888, P1609_4511, P1609_5516, P1609_5890, P1609_8243
173|PHI:173|CTG1|AAC03782|5466|Colletotrichum trifolii|Loss of pathogenicity, 203|PHI:203|BCG1|CAC19871|40559|Botrytis cinerea|Reduced virulence, 2250|PHI:2250|Gna1|Q6EH42|13684|Phaeosphaeria nodorum (related: Stagonospora nodorum)|Reduced virulence, 2413|PHI:2413|Cgg1|B2Z3E2|31870|Colletotrichum graminicola|Reduced virulence, 2414|PHI:2414|AaGa1|D2X3B5|5599|Alternaria alternata|Unaffected pathog…	P1609_5446, P1609_8330
2095|PHI:2095|Calcium-transporting ATPase 3|MGG_10730|148305|Magnaporthe oryzae (related: Magnaporthe grisea)|Reduced virulence, 2096|PHI:2096|Calcium-transporting ATPase 3|MGG_02074|148305|Magnaporthe oryzae (related: Magnaporthe grisea)|Loss of pathogenicity, 2098|PHI:2098|Calcium-transporting ATPase 3|MGG_05078|148305|Magnaporthe oryzae (related: Magnaporthe grisea)|Loss of pathogenicity	P1609_10916, P1609_51, P1609_6685, P1609_9275
1269|PHI:1269|FGSG_02838|I1RFK9|5518|Gibberella zeae (related: Fusarium graminearum)|Unaffected pathogenicity	P1609_10000, P1609_12903, P1609_2998, P1609_3072, P1609_649, P1609_7111, P1609_795, P1609_8764, P1609_9160, P1609_9164
1085|PHI:1085|Ptr2|AAO31597|13684|Stagonospora nodorum|Unaffected pathogenicity, 2266|PHI:2266|Ptr2|0|13684|Phaeosphaeria nodorum (related: Stagonospora nodorum)|Unaffected pathogenicity	P1609_11274, P1609_12010, P1609_6063, P1609_9293
2329|PHI:2329|CTB4|A0ST42|29003|Cercospora nicotianae|Reduced virulence, 737|PHI:737|CTB4|ABK64181|29003|Cercospora nicotianae|Reduced virulence	P1609_3824, P1609_7210
2099|PHI:2099|Pmc1|MGG_07971|148305|Magnaporthe oryzae (related: Magnaporthe grisea)|Mixed outcome	P1609_10495, P1609_11694, P1609_6112, P1609_8860
1027|PHI:1027|bcpg1|AAC64374|40559|Botrytis cinerea|Reduced virulence, 103|PHI:103|BCPGA1|AAC64374|40559|Botrytis cinerea|Reduced virulence, 114|PHI:114|PG1|AAC05015|5507|Fusarium oxysporum|Unaffected pathogenicity, 2343|PHI:2343|Pcipg2|Q0ZJ79|4784|Phytophthora capsici|Reduced virulence, 247|PHI:247|CPPG1|CAA71246|5111|Claviceps purpurea|Loss of pathogenicity, 2817|PHI:2817|Aapg1|Q9C4A0|5599|Alte…	P1609_5514, P1609_680
1555|PHI:1555|GzMyb019|I1RDG6|5518|Gibberella zeae (related: Fusarium graminearum)|Unaffected pathogenicity	P1609_2516, P1609_3922, P1609_7702
2247|PHI:2247|Sch1|EAT82552|13684|Phaeosphaeria nodorum (related: Stagonospora nodorum)|Unaffected pathogenicity	P1609_11606, P1609_4595
144|PHI:144|CHT42|AAC05829|29875|Trichoderma virens|Reduced virulence	P1609_10317, P1609_12307, P1609_7089, P1609_8022, P1609_845, P1609_9846
13|PHI:13|PELA|Q04701|140110|Nectria haematococca|Unaffected pathogenicity, 179|PHI:179|PELA|AAA33338|140110|Nectria haematococca (related: Fusarium solani)|Reduced virulence, 180|PHI:180|PELD|AAC49420|140110|Nectria haematococca (related: Fusarium solani)|Reduced virulence, 54|PHI:54|PELD|Q00845|140110|Nectria haematococca|Unaffected pathogenicity	P1609_6704
1736|PHI:1736|GzZC051|I1S4F3|5518|Gibberella zeae (related: Fusarium graminearum)|Unaffected pathogenicity	P1609_10221, P1609_10488, P1609_2115, P1609_4380, P1609_695, P1609_7284, P1609_9007, P1609_9396
2211|PHI:2211|endo-1,4-beta-xylanase B [GH10 family]|MGG_08331|148305|Magnaporthe oryzae (related: Magnaporthe grisea)|Reduced virulence, 2213|PHI:2213|endo-1,4-beta-xylanase I [GH10 family]|MGG_07955|148305|Magnaporthe oryzae (related: Magnaporthe grisea)|Reduced virulence, 2214|PHI:2214|endo-1,4-beta-xylanase I [GH10 family]|MGG_08424|148305|Magnaporthe oryzae (related: Magnaporthe grisea)|Redu…	P1609_10517, P1609_11877, P1609_12083
1076|PHI:1076|STE20|ACS91347|54734|Mycosphaerella graminicola|Unaffected pathogenicity, 1272|PHI:1272|FGSG_01559|I1RYN5|5518|Gibberella zeae (related: Fusarium graminearum)|Unaffected pathogenicity, 2127|PHI:2127|MGSTE20p|C6KEF5|54734|Mycosphaerella graminicola (related: Zymoseptoria triticii)|Unaffected pathogenicity, 2233|PHI:2233|Smu1|Q4P5N0|5270|Ustilago maydis|reduced virulence, 382|PHI:382|…	P1609_4077
243|PHI:243|CHIP6|AAD00894|5457|Colletotrichum gloeosporioides|Reduced virulence	P1609_3345, P1609_656
2240|PHI:2240|Srt1|Q4PBY9|5270|Ustilago maydis|reduced virulence	P1609_2401, P1609_2421, P1609_4656, P1609_5631, P1609_9018
2206|PHI:2206|endo-1,4-beta-xylanase precursor [GH10 family]|MGG_14243|148305|Magnaporthe oryzae (related: Magnaporthe grisea)|Reduced virulence, 2208|PHI:2208|endo-1,4-beta-xylanase [GH10 family]|MGG_05464|148305|Magnaporthe oryzae (related: Magnaporthe grisea)|Reduced virulence, 2209|PHI:2209|endo-1,4-beta-xylanase [GH10 family]|MGG_07868|148305|Magnaporthe oryzae (related: Magnaporthe grisea)|…	P1609_4704, P1609_7143, P1609_9894
1260|PHI:1260|FGSG_13944|I1RUC7|5518|Gibberella zeae (related: Fusarium graminearum)|Unaffected pathogenicity	P1609_3171, P1609_9974
1049|PHI:1049|CTB2|ABK64180|29003|Cercospora nicotianae|Reduced virulence	P1609_10457, P1609_1447, P1609_9239, P1609_9984
1036|PHI:1036|Rac|CAO82105|5111|Claviceps purpurea|Loss of pathogenicity, 2052|PHI:2052|Cdc42|Q9P8I4|148305|Magnaporthe oryzae (related: Magnaporthe grisea)|Reduced virulence, 2054|PHI:2054|Rac1|A0SXQ7|148305|Magnaporthe oryzae (related: Magnaporthe grisea)|Loss of pathogenicity, 3478 | Vdrac1 | PHI:3478 | G2WXZ2 | 27337 | Verticillium dahliae | unaffected pathogenicity, 3623 | RacA | PHI:3623 | …	P1609_2846, P1609_8414
2383|PHI:2383| MfCUT1|Q2VF46|38448|Monilinia fructicola|Increased virulence (hypervirulence), 407|PHI:407|PBC1|CAB40372|76659|Pyrenopeziza brassicae|Loss of pathogenicity, 69|PHI:69|CUTA|CAA93255|40559|Botrytis cinerea|Unaffected pathogenicity	P1609_12476, P1609_5496, P1609_6785, P1609_8965
1575|PHI:1575|GzOB015|I1RIQ3|5518|Gibberella zeae (related: Fusarium graminearum)|Unaffected pathogenicity, 1581|PHI:1581|GzOB021|I1RPX8|5518|Gibberella zeae (related: Fusarium graminearum)|Unaffected pathogenicity	P1609_6583, P1609_7268
1484|PHI:1484|GzHMG016|I1RMG1|5518|Gibberella zeae (related: Fusarium graminearum)|Unaffected pathogenicity, 1494|PHI:1494|MAT1-1-3|I1RX41|5518|Gibberella zeae (related: Fusarium graminearum)|Unaffected pathogenicity, 1496|PHI:1496|MAT1-2-1|I1RX44|5518|Gibberella zeae (related: Fusarium graminearum)|Unaffected pathogenicity, 411|PHI:411|ROP1|AAV54029|5270|Ustilago maydis|Unaffected pathogenicity,…	P1609_3106, P1609_5194
1732|PHI:1732|GzZC047|I1S6B4|5518|Gibberella zeae (related: Fusarium graminearum)|Unaffected pathogenicity, 1854|PHI:1854|GzZC169|I1S054|5518|Gibberella zeae (related: Fusarium graminearum)|Unaffected pathogenicity	P1609_1629, P1609_7100
100|PHI:100|ADR1|AAA75366|5270|Ustilago maydis|Loss of pathogenicity, 1199|PHI:1199|(Sc Tpk2)|I1RSW5|5518|Gibberella zeae (related: Fusarium graminearum)|Reduced virulence, 146|PHI:146|CT-PKAC|AAC04355|5466|Colletotrichum trifolii|Loss of pathogenicity, 227|PHI:227|PKA1|AAG30145|5207|Cryptococcus neoformans|Loss of pathogenicity, 2317|PHI:2317|aapk1|B0LW64|5599|Alternaria alternata|Reduced virule…	P1609_4214
2279|PHI:2279|Conserved hypothetical protein|J9N0G7|5507|Fusarium oxysporum|Unaffected pathogenicity	P1609_4428
404|PHI:404|PTH11|AAD30436|318829|Magnaporthe oryzae|Reduced virulence, 441|PHI:441|BTP1|CAE55153|40559|Botrytis cinerea|Reduced virulence	P1609_12037, P1609_6708, P1609_7283
1054|PHI:1054|CgCHSI|AAL23717|31870|Colletotrichum graminicola|Unaffected pathogenicity, 205|PHI:205|CaCHS1|CAA21947|5476|Candida albicans|Loss of pathogenicity, 236|PHI:236|WdCHS2|AAC34496|5970|Wangiella (Exophiala) dermatitidis|Reduced virulence, 276|PHI:276|Bcchs1|CAA54909|40559|Botrytis cinerea|Reduced virulence, 3045 | CHSA | PHI:3045 | Q4WIH1 | 746128 | Aspergillus fumigatus | mixed outcome…	P1609_5383, P1609_6271
2451|PHI:2451|FAEB1|I1S3N8|5518|Gibberella zeae (related: Fusarium graminearum)|Unaffected pathogenicity	P1609_11323, P1609_11616, P1609_2049
1032|PHI:1032|Bmp3|ABJ51957|40559|Botrytis cinerea|Reduced virulence, 113|PHI:113|MPS1|AAC63682|318829|Magnaporthe oryzae|Loss of pathogenicity, 1196|PHI:1196|(Mgv1)|I1S0S6|5518|Gibberella zeae (related: Fusarium graminearum)|Reduced virulence, 2318|PHI:2318|AaSLT2|D3J127|5599|Alternaria alternata |Reduced virulence, 2367|PHI:2367|Mps1|A3QYW5|5016|Cochliobolus heterostrophus|Reduced virulence, 24…	P1609_6054
2378|PHI:2378|DEP4|D2E9W9|29001|Alternaria brassicicola|Mixed outcome	P1609_11865, P1609_2381, P1609_4930, P1609_8997
1741|PHI:1741|GzZC056|I1S780|5518|Gibberella zeae (related: Fusarium graminearum)|Unaffected pathogenicity, 1828|PHI:1828|GzZC143|I1S351|5518|Gibberella zeae (related: Fusarium graminearum)|Unaffected pathogenicity, 1838|PHI:1838|GzZC153|I1RGC8|5518|Gibberella zeae (related: Fusarium graminearum)|Unaffected pathogenicity	P1609_4573
112|PHI:112|MAK1|AAC49410|140110|Nectria haematococca (related: Fusarium solani)|Reduced virulence	P1609_4010, P1609_4569
1619|PHI:1619|GzJUM001|I1RBK8|5518|Gibberella zeae (related: Fusarium graminearum)|Unaffected pathogenicity	P1609_10990, P1609_11975, P1609_12616, P1609_12642, P1609_12657, P1609_12715, P1609_2957, P1609_2993, P1609_4747
785|PHI:785|MGG_04128|EDJ99431|318829|Magnaporthe oryzae|Reduced virulence	P1609_12071, P1609_5368, P1609_8103
2822|PHI:2822|Cxt1p|Q5K8R6|5207|Cryptococcus neoformans|Reduced virulence	P1609_4316, P1609_9298, P1609_9922
2018|PHI:2018|MoPLC2|MGG_05332|148305|Magnaporthe oryzae (related: Magnaporthe grisea)|Loss of pathogenicity, 2019|PHI:2019|MoPLC3|MGG_08315|148305|Magnaporthe oryzae (related: Magnaporthe grisea)|Loss of pathogenicity, 2106|PHI:2106|1-phosphatidylinositol-4,5-bisphosphate phosphodiesterase delta 1 |MGG_05332|148305|Magnaporthe oryzae (related: Magnaporthe grisea)|Reduced virulence	P1609_10644, P1609_2897
1371|PHI:1371|GzC2H034|I1RM60|5518|Gibberella zeae (related: Fusarium graminearum)|Unaffected pathogenicity, 4490 | C2H2 | PHI:4490 | G5EGV6 | 318829 | Magnaporthe oryzae (related: Magnaporthe grisea) | effector (plant avirulence determinant)	P1609_12142, P1609_12796, P1609_2171, P1609_2174, P1609_2234, P1609_2238
1847|PHI:1847|GzZC162|I1RYK8|5518|Gibberella zeae (related: Fusarium graminearum)|Unaffected pathogenicity, 1989|PHI:1989|GzZC304|I1R9Z6|5518|Gibberella zeae (related: Fusarium graminearum)|Unaffected pathogenicity, 2863|PHI:2863|Lys144|Q5A7T6|5476|Candida albicans|Reduced virulence, 2864|PHI:2864|Zcf21|Q59SK6|5476|Candida albicans|Reduced virulence	P1609_5782, P1609_8238, P1609_8813
204|PHI:204|CaCDC35|AAG18428|5476|Candida albicans|Loss of pathogenicity, 22|PHI:22|UAC1|AAA57469|5270|Ustilago maydis|Loss of pathogenicity, 2368|PHI:2368|bac|Q9P880|40559|Botrytis cinerea|Reduced virulence, 240|PHI:240|BAC|CAB77164|40559|Botrytis cinerea|Reduced virulence, 241|PHI:241|CAC1|AAG60619|5207|Cryptococcus neoformans|Loss of pathogenicity, 3068 | BbAC | PHI:3068 | J4UTE1 | 176275 | Be…	P1609_7473
2927|PHI:2927|lip5|J9N2Z8|59765|Fusarium oxysporum f. sp. Lycopersici|Unaffected pathogenicity	P1609_2156
1279|PHI:1279|FGSG_12132|I1RU59|5518|Gibberella zeae (related: Fusarium graminearum)|Unaffected pathogenicity, 1281|PHI:1281|FGSG_07742|I1REQ8|5518|Gibberella zeae (related: Fusarium graminearum)|Unaffected pathogenicity	P1609_740, P1609_743
2412|PHI:2412|lipA|B9VSG8|339|Xanthomonas campestris|Reduced virulence	P1609_12212, P1609_1510, P1609_4486, P1609_5503, P1609_7492, P1609_9366
1713|PHI:1713|GzZC028|I1RGG4|5518|Gibberella zeae (related: Fusarium graminearum)|Unaffected pathogenicity	P1609_4818, P1609_7983
133|PHI:133|AKT1|BAA36588|5599|Alternaria alternata|Loss of pathogenicity, 508|PHI:508|AFT1|BAB69076|5599|Alternaria alternata|Loss of pathogenicity	P1609_12881, P1609_12935, P1609_2753, P1609_7975
3216 | MoCDIP4 | PHI:3216 | G4MVX4 | 318829 | Magnaporthe oryzae | mixed outcome	P1609_11098, P1609_11798, P1609_2166, P1609_9219
3070 | wadB | PHI:3070 | Q2YPI9 | 235 | Brucella abortus | reduced virulence	P1609_12486, P1609_12991, P1609_1956, P1609_2561, P1609_9242
1048|PHI:1048|CTB7|ABK64184|29003|Cercospora nicotianae|Reduced virulence	P1609_4209, P1609_4809, P1609_6866
125|PHI:125|SAP4|AAA17877|5476|Candida albicans|Reduced virulence, 126|PHI:126|SAP5|CAA82923|5476|Candida albicans|Reduced virulence, 127|PHI:127|SAP6|CAA82924|5476|Candida albicans|Reduced virulence, 17|PHI:17|ACP|CAA43678|5482|Candida tropicalis|Reduced virulence, 68|PHI:68|SAP1|AAA34368|5476|Candida albicans|Reduced virulence, 72|PHI:72|SAP2|AAM21050|5476|Candida albicans|Reduced virulence, 73…	P1609_4261
2296|PHI:2296|tmpL|ABW87261.1 |29001|Alternaria brassicicola|Reduced virulence, 2297|PHI:2297|tmpL|B0YAP6|746128|Aspergillus fumigatus|Reduced virulence, 3417 | Ohmm | PHI:3417 | W5ZQ93 | 176275 | Beauveria bassiana | increased virulence	P1609_981
1512|PHI:1512|GzHOME010|I1RXH4|5518|Gibberella zeae (related: Fusarium graminearum)|Unaffected pathogenicity, 1513|PHI:1513|GzHOME011|I1RXH8|5518|Gibberella zeae (related: Fusarium graminearum)|Unaffected pathogenicity, 1514|PHI:1514|GzHOME012|I1RYV5|5518|Gibberella zeae (related: Fusarium graminearum)|Unaffected pathogenicity, 2133|PHI:2133|MoHox3|MGG_01730|148305|Magnaporthe oryzae (related: Ma…	P1609_1347
138|PHI:138|CaNIK1|BAA24952|5476|Candida albicans|Reduced virulence, 212|PHI:212|COS1/CHIK1|AAC23929|5476|Candida albicans|Reduced virulence, 2252|PHI:2252|Fhk1|D0ES97|5507|Fusarium oxysporum|Reduced virulence, 2323|PHI:2323|mhk1|E9F082|568076|Metarhizium robertsii|Reduced virulence, 2482|PHI:2482|AlHK1|Q09JB7|160389|Alternaria longipes|Increased virulence (Hypervirulence), 2910|PHI:2910|Shk1|A7F…	P1609_1264
1163|PHI:1163|ERB1 (enhanced branching 1)|I1S042|5518|Gibberella zeae (related: Fusarium graminearum)|Reduced virulence, 2995|PHI:2995|MGG_09263.6|G4MQ91|148305|Magnaporthe oryzae|Reduced virulence, 889|PHI:889|MGG_09263|EDJ97928|318829|Magnaporthe oryzae|Reduced virulence	P1609_10291, P1609_12189, P1609_12224, P1609_12364, P1609_12601, P1609_12841, P1609_7550
1075|PHI:1075|STE12|ACS29558|54734|Mycosphaerella graminicola|Reduced virulence, 1387|PHI:1387|GzBrlA|I1RT19|5518|Gibberella zeae (related: Fusarium graminearum)|Unaffected pathogenicity, 2122|PHI:2122|MST12p|MGG_12958|148305|Magnaporthe oryzae (related: Magnaporthe grisea)|Loss of pathogenicity, 2126|PHI:2126|MGSTE12p|C5J0G7|54734|Mycosphaerella graminicola (related: Zymoseptoria triticii)|reduc…	P1609_8781
1747|PHI:1747|GzZC062|I1S6W1|5518|Gibberella zeae (related: Fusarium graminearum)|Lethal, 1773|PHI:1773|GzZC088|I1S409|5518|Gibberella zeae (related: Fusarium graminearum)|Unaffected pathogenicity	P1609_6847, P1609_7061
413|PHI:413|MPD1|AAT84078|13684|Stagonospora nodorum|Unaffected pathogenicity	P1609_12038, P1609_6750
2920|PHI:2920|FET3-1|E3QRA4|31870|Colletotrichum graminicola|Reduced virulence, 2921|PHI:2921|FET3-2|E3Q7G1|31870|Colletotrichum graminicola|Reduced virulence	P1609_1966, P1609_9211
2479|PHI:2479|corA|E1AP33|554|Pectobacterium carotovorum|Reduced virulence	P1609_7263
881|PHI:881|MGG_04556|EDJ96020|318829|Magnaporthe oryzae|Reduced virulence	P1609_11110
2838|PHI:2838|TOX9|D2SZX8|5016|Cochliobolus heterostrophus|Reduced virulence	P1609_2977, P1609_3606, P1609_7206
784|PHI:784|MGG_00056|EDK03390|318829|Magnaporthe oryzae|Reduced virulence	P1609_11652, P1609_7988
2376|PHI:2376|DEP2|D2E9W7|29001|Alternaria brassicicola|Mixed outcome	P1609_11870, P1609_9103, P1609_9121
2898|PHI:2896|BEC1005|CCU82697|62688|Blumeria graminis f. sp. hordei|Effector (plant avirulence determinant)	P1609_11209, P1609_5594, P1609_6527
222|PHI:222|PELB|AAD09857|5457|Colletotrichum gloeosporioides|Reduced virulence, 2476|PHI:2476|CcpelA|G8AA67|27358|Colletotrichum coccodes|Mixed outcome	P1609_5562
4194 | AKT7 | PHI:4194 | V5XZS6 | 5599 | Alternaria alternata | increased virulence (Hypervirulence)	P1609_12108, P1609_3633, P1609_5033, P1609_5034, P1609_8005, P1609_9314, P1609_9896
2175|PHI:2175|NMR3|MGG_09705|148305|Magnaporthe oryzae (related: Magnaporthe grisea)|Reduced virulence	P1609_4684
2063|PHI:2063|MCNA|G4N168|148305|Magnaporthe oryzae (related: Magnaporthe grisea)|Reduced virulence, 2110|PHI:2110|Serine/threonine-protein phosphatase 2B catalytic subunit |MGG_07456|148305|Magnaporthe oryzae (related: Magnaporthe grisea)|Unaffected pathogenicity, 2338|PHI:2338|UhCna1|I2G6S4|120017|Ustilago hordei|Reduced virulence, 2361|PHI:2361|cna1|Q0H744|5180|Sclerotinia sclerotiorum|Reduced…	P1609_7028
1456|PHI:1456|GzAra004|I1RN15|5518|Gibberella zeae (related: Fusarium graminearum)|Unaffected pathogenicity	P1609_2442, P1609_3573
2288|PHI:2288|abnik1|I2DB61|29001|Alternaria brassicicola|Reduced virulence, 2289|PHI:2289|BcBOA2|I2DB61|40559|Botrytis cinerea|Reduced virulence, 2310|PHI:2310|VGB|I2DB61|27337|Verticillium dahliae|Reduced virulence, 2826|PHI:2826|Fgb1|Q6XPX0|59765|Fusarium oxysporum f. sp. Lycopersici|Mixed outcome, 300|PHI:300|FGB1|AAO91808|5507|Fusarium oxysporum|Reduced virulence, 311|PHI:311|MGB1|BAC01165|3…	P1609_10788
2043|PHI:2043|XYL-6|Q8NJ73|148305|Magnaporthe oryzae (related: Magnaporthe grisea)|Unaffected pathogenicity, 2204|PHI:2204|endo-1,4-beta-xylanase [GH10 family]|MGG_01542|148305|Magnaporthe oryzae (related: Magnaporthe grisea)|Reduced virulence, 2207|PHI:2207|endo-1,4-beta-xylanase [GH10 family]|MGG_02245|148305|Magnaporthe oryzae (related: Magnaporthe grisea)|Reduced virulence, 568|PHI:568|XYL2 (…	P1609_1169, P1609_9048
1023|PHI:1023|bcnoxA|CAP12516|40559|Botrytis cinerea|Reduced virulence, 1035|PHI:1035|Cpnox1|CAP12327|5111|Claviceps purpurea|Reduced virulence, 2448|PHI:2448|AaNoxA|H9AWW9|5599|Alternaria alternata|Reduced virulence, 2912|PHI:2912|AaNoxA|H9AWW9|5599|Alternaria alternata|Reduced virulence, 2932|PHI:2932|NoxA|F8WSC5|5599|Alternaria alternata|Mixed outcome, 3443 | BcNoxD | PHI:3443 | M7UB04 | 40559…	P1609_8668
2136|PHI:2136|AVR-Pii|C4B8B7|148305|Magnaporthe oryzae (related: Magnaporthe grisea)|Effector (plant avirulence determinant)	P1609_11534, P1609_9055
1795|PHI:1795|GzZC110|I1RSX8|5518|Gibberella zeae (related: Fusarium graminearum)|Unaffected pathogenicity	P1609_4123
1720|PHI:1720|GzZC035|I1S956|5518|Gibberella zeae (related: Fusarium graminearum)|Unaffected pathogenicity	P1609_3920, P1609_3921, P1609_6378
1742|PHI:1742|GzZC057|I1S7H5|5518|Gibberella zeae (related: Fusarium graminearum)|Unaffected pathogenicity	P1609_3408, P1609_8232
1651|PHI:1651|GzWing023|I1S0U2|5518|Gibberella zeae (related: Fusarium graminearum)|Unaffected pathogenicity	P1609_1529
1270|PHI:1270|FGSG_06420|I1RHA1|5518|Gibberella zeae (related: Fusarium graminearum)|Unaffected pathogenicity	P1609_12900, P1609_2159, P1609_4478, P1609_4878, P1609_6916, P1609_8359
2745|PHI:2745|treY|Q02LV5|287|Pseudomonas aeruginosa|Mixed outcome	P1609_11527, P1609_11931, P1609_2804
419|PHI:419|CSH1|AAP93915|5476|Candida albicans|Reduced virulence	P1609_11273, P1609_4897
2638|PHI:2638|Ilv3A|Q4X099|746128|Aspergillus fumigatus|Reduced virulence, 2639|PHI:2639|Ilv3B|Q4WK65|746128|Aspergillus fumigatus|Mixed outcome	P1609_7298, P1609_9459
2978|PHI:2978|MoCel12A|G4N5V2|148305|Magnaporthe oryzae|Unaffected pathogenicity	P1609_11941, P1609_8643, P1609_9433
1841|PHI:1841|GzZC156|I1RIY6|5518|Gibberella zeae (related: Fusarium graminearum)|Unaffected pathogenicity, 1920|PHI:1920|GzZC235|I1RCK0|5518|Gibberella zeae (related: Fusarium graminearum)|Unaffected pathogenicity, 2994|PHI:2994|MGG_06355.6|G4N7V2|148305|Magnaporthe oryzae|Reduced virulence	P1609_3545, P1609_4231
2314|PHI:2314|Sssod1|A7E5X4|5180|Sclerotinia sclerotiorum|Reduced virulence, 271|PHI:271|SOD1|AAC12872|5476|Candida albicans|Reduced virulence, 2806|PHI:2806|SsSOD1|A7E5X4|5180|Sclerotinia sclerotiorum |Reduced virulence, 2813|PHI:2813|sod1|P00445|4932|Saccharomyces cerevisiae|Loss of pathogenicity, 318|PHI:318|SOD1|AAK31919|292817|Cryptococcus gattii|Loss of pathogenicity, 330|PHI:330|BcSOD1|CAD…	P1609_11953
1739|PHI:1739|GzZC054|I1S7B9|5518|Gibberella zeae (related: Fusarium graminearum)|Unaffected pathogenicity, 1864|PHI:1864|GzZC179|I1SAX2|5518|Gibberella zeae (related: Fusarium graminearum)|Unaffected pathogenicity, 2983|PHI:2983|MGG_06279.6|G4N8E3|148305|Magnaporthe oryzae|Reduced virulence	P1609_4312, P1609_4313
2962|PHI:2962|glyA|C5BEV2|67780|Edwardsiella ictaluri|Reduced virulence	P1609_11201, P1609_9689
2968|PHI:2968|Hxs1|J9VQA5|5207|Cryptococcus neoformans|Reduced virulence	P1609_3367, P1609_6402
1707|PHI:1707|GzZC022|I1RJY6|5518|Gibberella zeae (related: Fusarium graminearum)|Unaffected pathogenicity, 1857|PHI:1857|GzZC172|I1S3I1|5518|Gibberella zeae (related: Fusarium graminearum)|Unaffected pathogenicity	P1609_1512, P1609_4792
3028 | Vatr2 | PHI:3028 | A5CVB7 | 28447 | Clavibacter michiganensis | reduced virulence	P1609_7448, P1609_9981
1893|PHI:1893|GzZC208|I1RNY0|5518|Gibberella zeae (related: Fusarium graminearum)|Unaffected pathogenicity	P1609_2407
566|PHI:566|cel2|AAK19621|5017|Cochliobolus carbonum|Unaffected pathogenicity	P1609_11628, P1609_4844, P1609_5990, P1609_7182
1423|PHI:1423|GzC2H091|I1S2R1|5518|Gibberella zeae (related: Fusarium graminearum)|Unaffected pathogenicity, 1424|PHI:1424|GzC2H092|I1S3J7|5518|Gibberella zeae (related: Fusarium graminearum)|Unaffected pathogenicity	P1609_11905, P1609_210
3270 | ARSEF 2860 | PHI:3270 | J5K8Q8 | 176275 | Beauveria bassiana | mixed outcome, 3271 | ARSEF 2860 | PHI:3271 | J4UI12 | 176275 | Beauveria bassiana | mixed outcome	P1609_11111, P1609_1210
2959|PHI:2959|mdh|C5BF98|67780|Edwardsiella ictaluri|Reduced virulence	P1609_4900, P1609_562
1005|PHI:1005|FgHOG1|Not Available|5518|Fusarium graminearum|Reduced virulence, 1031|PHI:1031|bcSAK1|CAJ85638|40559|Botrytis cinerea|Reduced virulence, 149|PHI:149|HOG1|CAA62214|5476|Candida albicans|Reduced virulence, 153|PHI:153|OSM1|AAF09475|318829|Magnaporthe oryzae|Unaffected pathogenicity, 2327|PHI:2327|HOG1|P0C431|5518|Gibberella zeae (related: Fusarium graminearum)|Reduced virulence, 2365…	P1609_1448
1072|PHI:1072|STE7|ACR82519|54734|Mycosphaerella graminicola|Loss of pathogenicity, 1179|PHI:1179|(Sc Ste7)|I1RZQ2|5518|Gibberella zeae (related: Fusarium graminearum)|Reduced virulence, 165|PHI:165|CgMEK1 (related: EMK1)|AAD55385|5457|Colletotrichum gloeosporioides|Loss of pathogenicity, 2120|PHI:2120|MST7p|MGG_00800|148305|Magnaporthe oryzae (related: Magnaporthe grisea)|Loss of pathogenicity, …	P1609_9819
3238 | ctrC | PHI:3238 | B0XUP5 | 746128 | Aspergillus fumigatus | mixed outcome	P1609_10454, P1609_721, P1609_9089
2835|PHI:2835|RED2|C3JXE8|5016|Cochliobolus heterostrophus|Reduced virulence	P1609_1228, P1609_8235, P1609_9882
2388|PHI:2388|Chi2|0|5530|Metarhizium anisopliae|Mixed outcome	P1609_12448, P1609_2445, P1609_3393
1528|PHI:1528|GzHOMEL041|I1SAN0|5518|Gibberella zeae (related: Fusarium graminearum)|Unaffected pathogenicity	P1609_5570, P1609_5577
1055|PHI:1055|CgCHSIII|AAL23718|31870|Colletotrichum graminicola|Unaffected pathogenicity, 2299|PHI:2299|CHS1|G4XVB6|148305|Magnaporthe oryzae (related: Magnaporthe grisea)|Reduced virulence, 2359|PHI:2359|Bcchs3a|Q8TG14|40559|Botrytis cinerea|Mixed outcome, 237|PHI:237|WdCHS3|AAC35278|5970|Wangiella (Exophiala) dermatitidis|Reduced virulence, 549|PHI:549|BCCHS3a|AAM14606|40559|Botrytis cinerea|R…	P1609_1423
2147|PHI:2147|Erl1|G5EH97|148305|Magnaporthe oryzae (related: Magnaporthe grisea)|Reduced virulence	P1609_3039
3415 | Fre2 | PHI:3415 | T2BNJ5 | 5207 | Cryptococcus neoformans | mixed outcome, 4211 | FRE3 | PHI:4211 | J9VNH2 | 5207 | Cryptococcus neoformans | effector (plant avirulence determinant)	P1609_10455, P1609_11583, P1609_5886, P1609_9906
2316|PHI:2316|ChVel1|G4XKY8|5016|Cochliobolus heterostrophus|Mixed outcome, 2349|PHI:2349|VE1 (VEA) (velvet)|G8CYZ6|5518|Gibberella zeae (related: Fusarium graminearum)|Reduced virulence, 2588|PHI:2588|VEA1|B2CQJ9|5037|Histoplasma capsulatum|Reduced virulence, 2609|PHI:2609|VEA1|B2CQJ9|5037|Histoplasma capsulatum|Reduced virulence, 2653|PHI:2653|bcvel1|G2Y3E7|40559|Botrytis cinerea|Reduced virule…	P1609_3184
2644|PHI:2644|thioredoxin 1|P0AA28|90371|Salmonella enterica serovar Typhimurium|Reduced virulence	P1609_5480
2884|PHI:2884|MNN21|Q59KJ7|5476|Candida albicans|Reduced virulence, 2885|PHI:2885|MNN22|Q5AD72|5476|Candida albicans|Reduced virulence, 2886|PHI:2886|MNN23|Q5AP90|5476|Candida albicans|Reduced virulence, 2887|PHI:2887|MNN24|Q5A687|5476|Candida albicans|Reduced virulence, 2888|PHI:2888|MNN26 |Q59R28|5476|Candida albicans|Reduced virulence, 3794 | MNN2 | PHI:3794 | Q6FQP8 | 5478 | Candida glabrata …	P1609_10607
2382|PHI:2382|Upa2|Q6QIY0|5270|Ustilago maydis|Unaffected pathogenicity, 378|PHI:378|SIT4|EAK91146|5476|Candida albicans|Reduced virulence	P1609_5140, P1609_6441
1431|PHI:1431|Pac1|I1S7Z5|5518|Gibberella zeae (related: Fusarium graminearum)|Unaffected pathogenicity, 185|PHI:185|RIM101|AAD51714|5476|Candida albicans|Reduced virulence, 314|PHI:314|PAC1|AAF93178|5180|Sclerotinia sclerotiorum|Reduced virulence, 315|PHI:315|PacC|AAM95700|5507|Fusarium oxysporum|Increased virulence (Hypervirulence), 398|PHI:398|PacC|CAA87390|162425|Aspergillus nidulans|Reduced …	P1609_507
1923|PHI:1923|GzZC238|I1RHB3|5518|Gibberella zeae (related: Fusarium graminearum)|Unaffected pathogenicity	P1609_6666, P1609_9834
1073|PHI:1073|STE11|ACS91346|54734|Mycosphaerella graminicola|Loss of pathogenicity, 2119|PHI:2119|MST11p|MGG_14847|148305|Magnaporthe oryzae (related: Magnaporthe grisea)|Loss of pathogenicity, 2123|PHI:2123|MGSTE11p|C6KEF4|54734|Mycosphaerella graminicola (related: Zymoseptoria triticii)|Loss of pathogenicity, 2397|PHI:2397|ChSte11|C6L683|5016|Cochliobolus heterostrophus|Loss of pathogenicity, …	P1609_4248
352|PHI:352|GLO1|CAD79488|5270|Ustilago maydis|Loss of pathogenicity	P1609_1274, P1609_6713
1024|PHI:1024|bcnoxB|CAP12517|40559|Botrytis cinerea|Reduced virulence, 2913|PHI:2913|AaNoxB|J7H173|5599|Alternaria alternata|Reduced virulence, 2933|PHI:2933|NoxB|J7H173|5599|Alternaria alternata|Loss of pathogenicity, 3934 | cpnox2 | PHI:3934 | B0BES0 | 5111 | Claviceps purpurea | increased virulence (Hypervirulence), 577|PHI:577|NoxB|BAE72682|35717|Epichloe festucae|Wild-type mutualism, 859|PH…	P1609_4003
405|PHI:405|PDE1|AAK07740|318829|Magnaporthe oryzae|Reduced virulence	P1609_6158, P1609_8042
2304|PHI:2304|BCFHG1|CAP74387|40559|Botrytis cinerea|Unaffected pathogenicity, 3275 | fhpA | PHI:3275 | Q4W9X3 | 746128 | Aspergillus fumigatus | mixed outcome, 3276 | fhpB | PHI:3276 | Q4WC12 | 746128 | Aspergillus fumigatus | unaffected pathogenicity, 667|PHI:667|FHB1|AAP41066|178876|Cryptococcus neoformans|Reduced virulence	P1609_8141
2581|PHI:2581|Rim9|Q4PH32|5270|Ustilago maydis|Unaffected pathogenicity, 2602|PHI:2602|Rim9|Q4PH32|5270|Ustilago maydis|Unaffected pathogenicity	P1609_1761, P1609_3133
1130|PHI:1130|Xdh1|Q0UA24|13684|Stagonospora nodorum (related: Phaeosphaeria nodorum)|Unaffected pathogenicity, 2256|PHI:2256|Xdh1|Q0UA24|13684|Phaeosphaeria nodorum (related: Stagonospora nodorum)|Unaffected pathogenicity	P1609_761
1028|PHI:1028|bcpme1|CAC29255|40559|Botrytis cinerea|Reduced virulence, 1029|PHI:1029|bcpme2|CAD21438|40559|Botrytis cinerea|Unaffected pathogenicity, 278|PHI:278|BCPME1|CAC29255|40559|Botrytis cinerea|Reduced virulence, 540|PHI:540|BCPME2|CAD21438|332648|Botrytis cinerea|Unaffected pathogenicity	P1609_8576
2425|PHI:2425|PKS2|Q6RKG2|5016|Cochliobolus heterostrophus|Reduced virulence, 2895|PHI:2895|F-avi4330|B9JV05|373|Agrobacterium vitis|Loss of pathogenicity	P1609_10207, P1609_11370, P1609_4993
1450|PHI:1450|GzGATA008|I1RM88|5518|Gibberella zeae (related: Fusarium graminearum)|Lethal, 2176|PHI:2176|ASD4|MGG_06050|148305|Magnaporthe oryzae (related: Magnaporthe grisea)|Loss of pathogenicity, 2556|PHI:2556|GLN3|Q5AKA8|5476|Candida albicans|Reduced virulence, 2618|PHI:2618|SFU1|Q5AP95|5476|Candida albicans|Reduced virulence, 2833|PHI:2833|Cir1|Q09RL3|5207|Cryptococcus neoformans|Loss of pa…	P1609_6502
2115|PHI:2115|Annexin A7|MGG_06847|148305|Magnaporthe oryzae (related: Magnaporthe grisea)|Loss of pathogenicity	P1609_7840
2109|PHI:2109|CNB|MGG_06933|148305|Magnaporthe oryzae (related: Magnaporthe grisea)|Mixed outcome, 2339|PHI:2339|UhCnb1|I2G5N7|120017|Ustilago hordei|Reduced virulence, 2560|PHI:2560|CNB1|Q6FLU4|5478|Candida glabrata|Reduced virulence, 2640|PHI:2640|CNB1|C4XXN5|36911|Candida lusitaniae|Reduced virulence, 290|PHI:290|CNB1|EAL03139|5476|Candida albicans|Reduced virulence, 474|PHI:474|CNB1|AAG13937|…	P1609_7744
97|PHI:97|TOXC|AAC62818|5017|Cochliobolus carbonum|Reduced virulence	P1609_12109, P1609_5041, P1609_5359, P1609_9900
2490|PHI:2490|MCA|E9B636|5665|Leishmania mexicana|Mixed outcome	P1609_3456, P1609_6070
3112 | galU | PHI:3112 | Q8P8Q1 | 339 | Xanthomonas campestris | loss of pathogenicity	P1609_6636, P1609_897
3630 | Rv2467 | PHI:3630 | L7N655 | 1773 | Mycobacterium tuberculosis | increased virulence	P1609_11012, P1609_7631
1374|PHI:1374|GzC2H037|I1RN37|5518|Gibberella zeae (related: Fusarium graminearum)|Unaffected pathogenicity	P1609_8337
162|PHI:162|CaFTR1|AAF69680|5476|Candida albicans|Loss of pathogenicity, 299|PHI:299|FER2|A1A652|5270|Ustilago maydis|Reduced Virulence, 485|PHI:485|FTR1|AAF69680|5476|Candida albicans|Loss of pathogenicity	P1609_9213
1721|PHI:1721|GzZC036|I1S914|5518|Gibberella zeae (related: Fusarium graminearum)|Unaffected pathogenicity, 1934|PHI:1934|GzZC249|I1RC69|5518|Gibberella zeae (related: Fusarium graminearum)|Unaffected pathogenicity	P1609_4594, P1609_6046
903|PHI:903|um01888||5270|Ustilago maydis|Unaffected pathogenicity	P1609_6256
1759|PHI:1759|GzZC074|I1RXS2|5518|Gibberella zeae (related: Fusarium graminearum)|Unaffected pathogenicity	P1609_11271
2148|PHI:2148|7,8-LDS|MGG_13239|148305|Magnaporthe oryzae (related: Magnaporthe grisea)|Unaffected pathogenicity, 494|PHI:494|PPOA|EAL89712|5085|Aspergillus fumigatus|Increased virulence (Hypervirulence), 496|PHI:496|PPOC|EAL92371|5085|Aspergillus fumigatus|Increased virulence (Hypervirulence)	P1609_6574, P1609_9928
1435|PHI:1435|GzC2H104|I1S9G1|5518|Gibberella zeae (related: Fusarium graminearum)|Unaffected pathogenicity	P1609_8717
199|PHI:199|AOX1|AAF82788|5499|Cladosporium fulvum|Reduced virulence	P1609_12501, P1609_9233
3378 | Plegl1 | PHI:3378 | G9JLA8 | 285811 | Pyrenochaeta lycopersici | unaffected pathogenicity	P1609_1565, P1609_3744, P1609_9133
2645|PHI:2645|ClpV|Q7WP75|518|Bordetella bronchiseptica|Reduced virulence, 4559 | T6SS2 | PHI:4559 | Q6TKU1 | 562 | Escherichia coli | effector (plant avirulence determinant)	P1609_267, P1609_4120
409|PHI:409|BbCHIT1|AAN41259|176275|Beauveria bassiana|Increased virulence (Hypervirulence)	P1609_1508, P1609_5311
1208|PHI:1208|(Sc Sch9)|I1RAE5|5518|Gibberella zeae (related: Fusarium graminearum)|Reduced virulence, 2557|PHI:2557|CaSch9p|Q5AHG6|5476|Candida albicans|Reduced virulence, 3131 | FgSCH9 | PHI:3131 | I1RAE5 | 5518 | Fusarium graminearum | mixed outcome, 3132 | Mosch9 | PHI:3132 | L7JE74 | 318829 | Magnaporthe oryzae | mixed outcome, 376|PHI:376|SCH9|AAM21494|5207|Cryptococcus neoformans|Reduced v…	P1609_850
3314 | cca1 | PHI:3314 | G4MNN4 | 318829 | Magnaporthe oryzae | loss of pathogenicity	P1609_10128, P1609_10348, P1609_12359, P1609_12540, P1609_12719, P1609_2308
2976|PHI:2976|CgOPT1|C6ZRH8|29905|Colletotrichum gloeosporioides f. sp. aeschynomenes|Reduced virulence	P1609_544
1082|PHI:1082|CpkA|ABD59786|13684|Stagonospora nodorum|Reduced virulence, 1183|PHI:1183|(Sc Cmk1/Cmk2)|I1RRX7|5518|Gibberella zeae (related: Fusarium graminearum)|Reduced virulence, 2158|PHI:2158|MoCMK1|EU 984498|148305|Magnaporthe oryzae (related: Magnaporthe grisea)|Reduced virulence, 2271|PHI:2271|CpkA|Q00LS5|13684|Phaeosphaeria nodorum (related: Stagonospora nodorum)|Unaffected pathogenicity	P1609_7457
1165|PHI:1165|RRG2|I1RQL4|5518|Gibberella zeae (related: Fusarium graminearum)|Unaffected pathogenicity, 1642|PHI:1642|GzWing014|I1RQL4|5518|Gibberella zeae (related: Fusarium graminearum)|Unaffected pathogenicity, 2406|PHI:2406|MoSKN7|G4N7Y2|148305|Magnaporthe oryzae (related: Magnaporthe grisea)|Unaffected pathogenicity, 2585|PHI:2585|SKN7|I3QHH8|5599|Alternaria alternata|Reduced virulence, 260…	P1609_3489
1641|PHI:1641|FgFlbA|I1RQ89|5518|Gibberella zeae (related: Fusarium graminearum)|Reduced virulence, 2036|PHI:2036|RGS1|Q2LD94|148305|Magnaporthe oryzae (related: Magnaporthe grisea)|Increased virulence (Hypervirulence), 2192|PHI:2192|MoRgs1||148305|Magnaporthe oryzae (related: Magnaporthe grisea)|Mixed outcome, 2434|PHI:2434|FgFlbA|I1RQ89|5518|Gibberella zeae (related: Fusarium graminearum)|Reduc…	P1609_1124
2358|PHI:2358|PLD|Q4WZL4|746128|Aspergillus fumigatus|Reduced virulence	P1609_6367, P1609_6781
354|PHI:354|GPAB|CAC81805|5085|Aspergillus fumigatus|Reduced virulence, 395|PHI:395|FGA2|BAD44729|5507|Fusarium oxysporum|Loss of pathogenicity, 574|PHI:574|BCG3|BAD93277|40559|Botrytis cinerea|Reduced virulence, 75|PHI:75|GPA1|AAD46575|5207|Cryptococcus neoformans|Reduced virulence, 78|PHI:78|GPA3|AAC49726|5270|Ustilago maydis|Loss of pathogenicity, 82|PHI:82|MAGA|AAB65425|318829|Magnaporthe ory…	P1609_1445
1448|PHI:1448|GzGATA006|I1RWG5|5518|Gibberella zeae (related: Fusarium graminearum)|Unaffected pathogenicity, 2283|PHI:2283|AreA|J9MJU9|5507|Fusarium oxysporum|Reduced virulence, 2430|PHI:2430|areA|I1RWG5|5518|Gibberella zeae (related: Fusarium graminearum)|Reduced virulence, 287|PHI:287|CLNR1|AAN65464|290576|Colletotrichum lindemuthianum|Loss of pathogenicity, 2992|PHI:2992|MGG_02755.6|Q01168|14…	P1609_2823
2032|PHI:2032|VTL1|G4NGA7|148305|Magnaporthe oryzae (related: Magnaporthe grisea)|Unaffected pathogenicity	P1609_5583, P1609_8452
1195|PHI:1195|(Sc Bck1)|I1RQI2|5518|Gibberella zeae (related: Fusarium graminearum)|Reduced virulence, 307|PHI:307|KPP4|AAN63948|5270|Ustilago maydis|Loss of pathogenicity, 476|PHI:476|STE11alpha|AAG30205|5207|Cryptococcus neoformans|Reduced virulence, 493|PHI:493|STE11|AAT98628|5478|Candida glabrata|Reduced virulence, 777|PHI:777|MGG_00883|EDK02450|318829|Magnaporthe oryzae|Loss of pathogenicity	P1609_9733
1064|PHI:1064|TPS1|AAN46744|318829|Magnaporthe oryzae|Loss of pathogenicity, 130|PHI:130|TPS1|CAA69223|5476|Candida albicans|Reduced virulence, 2172|PHI:2172|TPS1|MGG_03860|148305|Magnaporthe oryzae (related: Magnaporthe grisea)|Loss of pathogenicity, 2265|PHI:2265|Tps1|Q0UF61|13684|Phaeosphaeria nodorum (related: Stagonospora nodorum)|Reduced virulence, 322|PHI:322|TPS1|AAN46744|318829|Magnaport…	P1609_5079
123|PHI:123|PTH9 (related: NTH1)|AAB88889|318829|Magnaporthe oryzae|Reduced virulence, 4574 | NTH1 | PHI:4574 | Q059G5 | 5207 | Cryptococcus neoformans | mixed outcome, 651|PHI:651|TRE1|ABG25559|332648|Botrytis cinerea|Unaffected pathogenicity, 696|PHI:696|NTH1|AAM92143|5022|Leptosphaeria maculans|Unaffected pathogenicity, 775|PHI:775|MGG_09471|EDJ95622|318829|Magnaporthe oryzae|Reduced virulence…	P1609_6191
1056|PHI:1056|CgCHSV|AAL23719|31870|Colletotrichum graminicola|Reduced virulence, 2226|PHI:2226|Mcs1|XP_759351|5270|Ustilago maydis|Reduced virulence, 2300|PHI:2300|CHS6|G4XVC1|148305|Magnaporthe oryzae (related: Magnaporthe grisea)|Loss of pathogenicity, 285|PHI:285|CHSV|AAO49384|5507|Fusarium oxysporum|Increased virulence (Hypervirulence), 3048 | CSMA | PHI:3048 | Q4X0H6 | 746128 | Aspergillus …	P1609_6280
673|PHI:673|Can1|AAZ30050|178876|Cryptococcus neoformans|Unaffected pathogenicity, 674|PHI:674|Can2|AAZ30051|178876|Cryptococcus neoformans|Increased virulence (Hypervirulence)	P1609_11734, P1609_348
1335|PHI:1335|GzbZIP017|I1S0C0|5518|Gibberella zeae (related: Fusarium graminearum)|Reduced virulence, 2156|PHI:2156|Moatf1|MGG_08212|148305|Magnaporthe oryzae (related: Magnaporthe grisea)|Reduced virulence, 3110 | FgATF1 | PHI:3110 | I1S0C0 | 5518 | Fusarium graminearum | mixed outcome, 344|PHI:344|CPTF1|CAD21519|5111|Claviceps purpurea|Reduced virulence, 3808 | Atf1 | PHI:3808 | I1S0C0 | 5518 …	P1609_1751
2452|PHI:2452|FAED1|I1S2N6|5518|Gibberella zeae (related: Fusarium graminearum)|Unaffected pathogenicity	P1609_1021, P1609_4477, P1609_6876
1148|PHI:1148|Mid1|C6GZ42|5111|Claviceps purpurea|Loss of pathogenicity, 2093|PHI:2093|Mid1|MGG_12128|148305|Magnaporthe oryzae (related: Magnaporthe grisea)|Mixed outcome, 2274|PHI:2274|Mid1|C6GZ42|5111|Claviceps purpurea|Loss of pathogenicity, 2350|PHI:2350|MID1|I1RTB7|5518|Gibberella zeae (related: Fusarium graminearum)|Unaffected pathogenicity, 3205 | Mid1 | PHI:3205 | Q4WTR6 | 746128 | Asper…	P1609_5239
3663 | PD0681 | PHI:3663 | Q87DK1 | 2371 | Xylella fastidiosa | increased virulence (Hypervirulence)	P1609_7628, P1609_9776
1430|PHI:1430|GzC2H098|I1S7L4|5518|Gibberella zeae (related: Fusarium graminearum)|Unaffected pathogenicity	P1609_5257, P1609_7656
672|PHI:672|CAS1|AAL35099|192011|Cryptococcus neoformans|Increased virulence (Hypervirulence)	P1609_8794
923|PHI:923|um03616||5270|Ustilago maydis|Unaffected pathogenicity	P1609_12973, P1609_2361, P1609_4398, P1609_7609
1883|PHI:1883|GzZC198|I1RJ71|5518|Gibberella zeae (related: Fusarium graminearum)|Unaffected pathogenicity	P1609_10554
3071 | PsTatD4 | PHI:3071 | G4Z2B4 | 67593 | Phytophthora sojae | reduced virulence	P1609_6664, P1609_7672
1980|PHI:1980|GzZC295|I1RLF1|5518|Gibberella zeae (related: Fusarium graminearum)|Unaffected pathogenicity, 1984|PHI:1984|GzZC299|I1RB67|5518|Gibberella zeae (related: Fusarium graminearum)|Unaffected pathogenicity	P1609_19, P1609_717
26|PHI:26|CaMDR1|CAA37820|5476|Candida albicans|Reduced virulence	P1609_1139
2183|PHI:2183|CPXB|EHA48040.1|148305|Magnaporthe oryzae (related: Magnaporthe grisea)|Unaffected pathogenicity	P1609_4738, P1609_5549
1404|PHI:1404|GzC2H067|I1RWH6|5518|Gibberella zeae (related: Fusarium graminearum)|Unaffected pathogenicity	P1609_2102, P1609_2719
2171|PHI:2171|Peroxisomal copper amine oxidase|MGG_02681|148305|Magnaporthe oryzae (related: Magnaporthe grisea)|Reduced virulence	P1609_12999, P1609_2898
1701|PHI:1701|GzZC016|I1RKS9|5518|Gibberella zeae (related: Fusarium graminearum)|Unaffected pathogenicity, 1731|PHI:1731|GzZC046|I1S578|5518|Gibberella zeae (related: Fusarium graminearum)|Unaffected pathogenicity	P1609_3177
2893|PHI:2893|F-avi5730|B9K1Q7|373|Agrobacterium vitis|Unaffected pathogenicity, 2894|PHI:2894|F-avi3342|B9JZT5|373|Agrobacterium vitis|Loss of pathogenicity, 3274 | dhbF | PHI:3274 | W2E906 | 147375 | Paenibacillus larvae | unaffected pathogenicity, 3351 | mbtE | PHI:3351 | I6Y0L1 | 1773 | Mycobacterium tuberculosis | reduced virulence	P1609_1536, P1609_5760
2038|PHI:2038|Mir1|MGG_02370|148305|Magnaporthe oryzae (related: Magnaporthe grisea)|Unaffected pathogenicity	P1609_6997, P1609_7205, P1609_8991
1508|PHI:1508|GzHOME003|I1RNA9|5518|Gibberella zeae (related: Fusarium graminearum)|Unaffected pathogenicity, 2130|PHI:2130|MoHox4|MGG_06285|148305|Magnaporthe oryzae (related: Magnaporthe grisea)|reduced virulence	P1609_4304
3237 | ctrA2 | PHI:3237 | B0YDG4 | 746128 | Aspergillus fumigatus | mixed outcome	P1609_2800
3457 | PHO84 | PHI:3457 | J9VMW8 | 5207 | Cryptococcus neoformans | mixed outcome	P1609_1059, P1609_3720
115|PHI:115|PGX1|AAC26146|5017|Cochliobolus carbonum|Unaffected pathogenicity, 181|PHI:181|PGX1|AAK81847|5507|Fusarium oxysporum|Unaffected pathogenicity	P1609_2497
1331|PHI:1331|GzbZIP013|I1RWW4|5518|Gibberella zeae (related: Fusarium graminearum)|Unaffected pathogenicity, 2142|PHI:2142|MoAP1|XP_001408783|148305|Magnaporthe oryzae (related: Magnaporthe grisea)|Loss of pathogenicity, 2374|PHI:2374|Bap1|D2T177|40559|Botrytis cinerea|Unaffected pathogenicity, 3111 | FgAP1 | PHI:3111 | I1RWW4 | 5518 | Fusarium graminearum | mixed outcome, 412|PHI:412|CHAP1|AAS6…	P1609_4051
820|PHI:820|beta-tubulin|AAA34230|5025|Venturia inaequalis|Chemistry target, 821|PHI:821|tub2|AAP40265|38448|Monilinia fructicola|Chemistry target, 823|PHI:823|beta-tubulin|CAA56936|38038|Rhynchosporium secalis|Chemistry target	P1609_8562
2488|PHI:2488|Man1|G4ND25|148305|Magnaporthe oryzae (related: Magnaporthe grisea)|Unaffected pathogenicity, 2510|PHI:2510|msdS/AfmsdC|Q6PWQ1|746128|Aspergillus fumigatus|Unaffected pathogenicity	P1609_8020, P1609_9609
383|PHI:383|SOD5|EAL00626|5476|Candida albicans|Loss of pathogenicity	P1609_10010, P1609_3666
458|PHI:458|MHP1|AAD18059|318829|Magnaporthe oryzae|Reduced virulence, 487|PHI:487|MHP1|O94196|148305|Magnaporthe grisea|Reduced virulence	P1609_4399, P1609_758
1503|PHI:1503|GzHMG035|I1S828|5518|Gibberella zeae (related: Fusarium graminearum)|Unaffected pathogenicity	P1609_7454, P1609_7455
2313|PHI:2313|SCD|F8R4X8|5530|Metarhizium anisopliae|Increased virulence (Hypervirulence), 58|PHI:58|SCD1|BAA13009|5462|Colletotrichum lagenarium|Reduced virulence	P1609_10936, P1609_9
1399|PHI:1399|GzC2H062|I1RV74|5518|Gibberella zeae (related: Fusarium graminearum)|Unaffected pathogenicity	P1609_4905, P1609_6411
1763|PHI:1763|GzZC078|I1RXE8|5518|Gibberella zeae (related: Fusarium graminearum)|Unaffected pathogenicity, 1906|PHI:1906|GzZC221|I1RHN1|5518|Gibberella zeae (related: Fusarium graminearum)|Unaffected pathogenicity	P1609_6168
1681|PHI:1681|GzNF001|I1REN7|5518|Gibberella zeae (related: Fusarium graminearum)|Unaffected pathogenicity	P1609_220, P1609_2462
2808|PHI:2808|gas1|Q2KN79|59765|Fusarium oxysporum f. sp. Lycopersici|Reduced virulence, 33|PHI:33|PHR1|AAA68196|5476|Candida albicans|Reduced virulence, 522|PHI:522|GAS1|AAX78216|5507|Fusarium oxysporum|Reduced virulence	P1609_12133, P1609_7892
1999|PHI:1999|GzZC314|I1R9E5|5518|Gibberella zeae (related: Fusarium graminearum)|Unaffected pathogenicity	P1609_11787, P1609_2163, P1609_2389
1584|PHI:1584|GzOB024|I1RS24|5518|Gibberella zeae (related: Fusarium graminearum)|Unaffected pathogenicity	P1609_4321
3214 | MoCDIP2 | PHI:3214 | G4MML4 | 318829 | Magnaporthe oryzae | mixed outcome	P1609_1503, P1609_6292, P1609_7086
2411|PHI:2411|Ss-ggt1|A7F946|5180|Sclerotinia sclerotiorum|Reduced virulence	P1609_5106, P1609_9223
1010|PHI:1010|SID1|XM_385547|5518|Fusarium graminearum|Reduced virulence, 2050|PHI:2050|OMO1|BK005770|148305|Magnaporthe oryzae (related: Magnaporthe grisea)|Loss of pathogenicity, 377|PHI:377|SIDA|AAT84594|5085|Aspergillus fumigatus|Loss of pathogenicity, 486|PHI:486|SIDA|AAX40989|5085|Aspergillus fumigatus|Loss of pathogenicity	P1609_5458
1206|PHI:1206|(Sp Prp4)|I1RJM8|5518|Gibberella zeae (related: Fusarium graminearum)|Reduced virulence	P1609_10921
2530|PHI:2530|TUB1|Q4WKG5|746128|Aspergillus fumigatus|Mixed outcome	P1609_193, P1609_6004
3458 | PdGcs1 | PHI:3458 | K9GB51 | 36651 | Penicillium digitatum | mixed outcome, 4493 | CGT | PHI:4493 | G4MS28 | 318829 | Magnaporthe oryzae (related: Magnaporthe grisea) | effector (plant avirulence determinant)	P1609_7374
2061|PHI:2061|ATG8|MGG_01062.6 |148305|Magnaporthe oryzae (related: Magnaporthe grisea)|Loss of pathogenicity, 2076|PHI:2076|Moatg8|MGG_01062|148305|Magnaporthe oryzae (related: Magnaporthe grisea)|Loss of pathogenicity, 2139|PHI:2139|ATG8|ACJ06588 |148305|Magnaporthe oryzae (related: Magnaporthe grisea)|Loss of pathogenicity, 2497|PHI:2497|atg8|Q4P2U6|5270|Ustilago maydis|Mixed outcome	P1609_9541
1204|PHI:1204|(Sc Cbk1)|I1RC85|5518|Gibberella zeae (related: Fusarium graminearum)|Reduced virulence, 158|PHI:158|UKC1|AAC09291|5270|Ustilago maydis|Reduced virulence, 393|PHI:393|CpCOT1|CAH04535|5111|Claviceps purpurea|Loss of pathogenicity	P1609_6236, P1609_7252
1378|PHI:1378|GzC2H041|I1RQG9|5518|Gibberella zeae (related: Fusarium graminearum)|Unaffected pathogenicity, 331|PHI:331|CaACE2|EAK93180|5476|Candida albicans|Loss of pathogenicity	P1609_5540
1442|PHI:1442|GzDNL|I1RG27|5518|Gibberella zeae (related: Fusarium graminearum)|Unaffected pathogenicity, 1791|PHI:1791|GzZC106|I1RVN8|5518|Gibberella zeae (related: Fusarium graminearum)|Unaffected pathogenicity, 1940|PHI:1940|GzZC255|I1RMT2|5518|Gibberella zeae (related: Fusarium graminearum)|Unaffected pathogenicity	P1609_7170
3633 | Rv0469 | PHI:3633 | Q6MX39 | 1773 | Mycobacterium tuberculosis | increased virulence	P1609_3599, P1609_4517
256|PHI:256|GAS1|AAK52794|318829|Magnaporthe oryzae|Reduced virulence	P1609_1821, P1609_4780
1762|PHI:1762|GzZC077|I1RXJ4|5518|Gibberella zeae (related: Fusarium graminearum)|Unaffected pathogenicity	P1609_6763
547|PHI:547|CEL5A|AAT40313|40559|Botrytis cinerea|Unaffected pathogenicity	P1609_4365
1285|PHI:1285|FGSG_10591|I1SAR3|5518|Gibberella zeae (related: Fusarium graminearum)|Unaffected pathogenicity	P1609_11348, P1609_11639, P1609_12135
2322|PHI:2322|SidH|Q4WF54|746128|Aspergillus fumigatus|Reduced virulence	P1609_5634
612|PHI:612|orf408|AAL20306|216597|Salmonella enterica|Reduced virulence	P1609_6451
825|PHI:825|SE|AAQ18216|5551|Trichophyton rubrum|Chemistry target, 826|PHI:826|SE|AAZ08563|5551|Trichophyton rubrum|Chemistry target, 828|PHI:828|ERG1 (related: ERGA)|AAS60234|5085|Aspergillus fumigatus|chemistry target, 830|PHI:830|ERGA|ABD48706|162425|Aspergillus nidulans|Chemistry target	P1609_6329
1654|PHI:1654|GzWing027|I1S4Q8|5518|Gibberella zeae (related: Fusarium graminearum)|Unaffected pathogenicity, 252|PHI:252|FKH2|EAK98810|5476|Candida albicans|Loss of pathogenicity	P1609_1481
134|PHI:134|AKT2|BAA36589|5599|Alternaria alternata|Loss of pathogenicity, 2431|PHI:2431|ACTT2|C9K1M7|5599|Alternaria alternata|Reduced virulence	P1609_9568
1168|PHI:1168|HDF1|I1RCN2|5518|Gibberella zeae (related: Fusarium graminearum)|Reduced virulence, 1171|PHI:1171|HDF1|I1RCN2|5518|Gibberella zeae (related: Fusarium graminearum)|Reduced virulence, 1173|PHI:1173|HDF1|I1RCN2|5518|Gibberella zeae (related: Fusarium graminearum)|Reduced virulence, 2005|PHI:2005|HOS2|EDK04649|148305|Magnaporthe oryzae (related: Magnaporthe grisea)|Loss of pathogenicity	P1609_1255
2239|PHI:2239|Spe-Sdh|Q4P245|5270|Ustilago maydis|reduced virulence, 2519|PHI:2519|LYS9|Q4WQ27|746128|Aspergillus fumigatus|Lethal, 384|PHI:384|SPE3-LYS9|AAS48112|5207|Cryptococcus neoformans|Loss of pathogenicity	P1609_3194
2710|PHI:2710|mepB |H8ZZ79|474922|Colletotrichum gloeosporioides|Reduced virulence	P1609_7081
1038|PHI:1038|Ku70|CAM56211|5111|Claviceps purpurea|Unaffected pathogenicity, 1039|PHI:1039|Ku70|CAM56211|5111|Claviceps purpurea|Unaffected pathogenicity, 2275|PHI:2275|ku70|A3KLI8|5111|Claviceps purpurea|Loss of pathogenicity, 3328 | MrKu70 | PHI:3328 | E9EMQ0 | 568076 | Metarhizium robertsii | unaffected pathogenicity	P1609_1141
3381 | FVEG_12533 | PHI:3381 | W7N2B4 | 117187 | Fusarium verticillioides | unaffected pathogenicity	P1609_10056
2267|PHI:2267|Mls1|0|13684|Phaeosphaeria nodorum (related: Stagonospora nodorum)|Loss of pathogenicity, 365|PHI:365|MLS1|AAS91580|13684|Stagonospora nodorum|Loss of pathogenicity	P1609_2754
1292|PHI:1292|ZIF1|I1RD66|5518|Gibberella zeae (related: Fusarium graminearum)|Reduced virulence, 1320|PHI:1320|ZIF1|I1RD66|5518|Gibberella zeae (related: Fusarium graminearum)|Reduced virulence, 2324|PHI:2324|ZIF1|G4N9G2|148305|Magnaporthe oryzae (related: Magnaporthe grisea)|Reduced virulence, 444|PHI:444|ZIF1||5518|Fusarium graminearum|Reduced virulence	P1609_3730
800|PHI:800|MGG_13324|EDK00897|318829|Magnaporthe oryzae|Reduced virulence	P1609_12497
698|PHI:698|CtxA|AAF94614|243277|Vibrio cholerae|Reduced virulence	P1609_11506, P1609_12781, P1609_4501, P1609_683
1037|PHI:1037|Cla4|CAO82106|5111|Claviceps purpurea|Loss of pathogenicity, 1202|PHI:1202|(Sc Cla4)|I1RS48|5518|Gibberella zeae (related: Fusarium graminearum)|Reduced virulence, 3479 | Vdcla4 | PHI:3479 | G2X6S4 | 27337 | Verticillium dahliae | unaffected pathogenicity, 519|PHI:519|CHM1|AAL15449|318829|Magnaporthe oryzae|Reduced virulence	P1609_4268
1063|PHI:1063|MNH6|ABB30152|318829|Magnaporthe oryzae|Reduced virulence, 1470|PHI:1470|GzHMG002|Q4IQX3|5518|Gibberella zeae (related: Fusarium graminearum)|Reduced virulence	P1609_11074
2198|PHI:2198|MoRgs7|XP_001411659|148305|Magnaporthe oryzae (related: Magnaporthe grisea)|Reduced virulence, 2199|PHI:2199|MoRgs8|XP_001405673|148305|Magnaporthe oryzae (related: Magnaporthe grisea)|Unaffected pathogenicity	P1609_10507
206|PHI:206|CaNAG1|BAB43821|5476|Candida albicans|Reduced virulence, 221|PHI:221|NAG1|AAF04334|5476|Candida albicans|Reduced virulence	P1609_8635
109|PHI:109|CLK1|AAB61403|290576|Colletotrichum lindemuthianum|Reduced virulence, 1176|PHI:1176|(Sc Atg1)|I1RNG8|5518|Gibberella zeae (related: Fusarium graminearum)|Reduced virulence, 2035|PHI:2035|ATG1|Q52EB3|148305|Magnaporthe oryzae (related: Magnaporthe grisea)|Loss of pathogenicity, 2069|PHI:2069|Moatg1|MGG_06393|148305|Magnaporthe oryzae (related: Magnaporthe grisea)|Loss of pathogenicity	P1609_4188
1797|PHI:1797|GzZC112|I1RSR1|5518|Gibberella zeae (related: Fusarium graminearum)|Unaffected pathogenicity, 2930|PHI:2930|ctf2|J9MFF7|59765|Fusarium oxysporum f. sp. Lycopersici|Reduced virulence	P1609_1732
1881|PHI:1881|GzZC196|I1RJA3|5518|Gibberella zeae (related: Fusarium graminearum)|Unaffected pathogenicity, 2596|PHI:2596|UME6|Q59MD2|746128|Aspergillus fumigatus|Mixed outcome	P1609_2900
1692|PHI:1692|GzZC007|I1RYR6|5518|Gibberella zeae (related: Fusarium graminearum)|Unaffected pathogenicity	P1609_239, P1609_4082
1366|PHI:1366|GzCON7|I1RJV1|5518|Gibberella zeae (related: Fusarium graminearum)|Reduced virulence, 2039|PHI:2039|Con7p|Q069J4|148305|Magnaporthe oryzae (related: Magnaporthe grisea)|Loss of pathogenicity, 35|PHI:35|CON7|AAB69694|318829|Magnaporthe oryzae|Reduced virulence	P1609_10690
105|PHI:105|PLB1|AAC61890|5476|Candida albicans|Reduced virulence	P1609_2042
96|PHI:96|FAS2|AAA34345|5476|Candida albicans|Loss of pathogenicity	P1609_5358
157|PHI:157|TOXF|AAD45321|5017|Cochliobolus carbonum|Loss of pathogenicity	P1609_12110, P1609_9236
1722|PHI:1722|GzZC037|I1S8C0|5518|Gibberella zeae (related: Fusarium graminearum)|Unaffected pathogenicity	P1609_540
1723|PHI:1723|GzZC038|I1S832|5518|Gibberella zeae (related: Fusarium graminearum)|Unaffected pathogenicity	P1609_7416, P1609_7427
1576|PHI:1576|GzOB016|I1RJY5|5518|Gibberella zeae (related: Fusarium graminearum)|Unaffected pathogenicity	P1609_2674, P1609_8286
3384 | FVEG_12530 | PHI:3384 | W7N2C1 | 117187 | Fusarium verticillioides | unaffected pathogenicity	P1609_5620, P1609_8348
2033|PHI:2033|MgPex6|G4NBI6|148305|Magnaporthe oryzae (related: Magnaporthe grisea)|Loss of pathogenicity, 226|PHI:226|PEX6|AAK16738|5462|Colletotrichum lagenarium|Loss of pathogenicity, 2715|PHI:2715|PEX6 |I1RNL3|5518|Fusarium graminearum|Reduced virulence, 593|PHI:593|PEX6|ABG79929|318829|Magnaporthe oryzae|Loss of pathogenicity	P1609_8483
3050 | CHSF | PHI:3050 | Q4WC58 | 746128 | Aspergillus fumigatus | mixed outcome, 31|PHI:31|CHS3|BAA02707|5476|Candida albicans|Reduced virulence, 98|PHI:98|umCHS5|AAB84284|5270|Ustilago maydis|Reduced virulence	P1609_7404
2839|PHI:2839|RED1|Q8NJQ2|5016|Cochliobolus heterostrophus|Reduced virulence, 3386 | FVEG_12528 | PHI:3386 | W7NCN7 | 117187 | Fusarium verticillioides | unaffected pathogenicity	P1609_676
1558|PHI:1558|GzNH003|I1RNK5|5518|Gibberella zeae (related: Fusarium graminearum)|Unaffected pathogenicity, 1862|PHI:1862|GzZC177|I1RL97|5518|Gibberella zeae (related: Fusarium graminearum)|Unaffected pathogenicity	P1609_654
3162 | Mohik8 | PHI:3162 | G4MXJ1 | 318829 | Magnaporthe oryzae | loss of pathogenicity	P1609_824, P1609_9870
401|PHI:401|SOD2|AAB86583|5476|Candida albicans|Unaffected pathogenicity, 410|PHI:410|SOD2|AAW56834|5207|Cryptococcus neoformans|Loss of pathogenicity, 420|PHI:420|SOD2|AAS19620|292817|Cryptococcus gattii|Loss of pathogenicity	P1609_8163
213|PHI:213|CPA1|AAF69795|5207|Cryptococcus neoformans|Reduced virulence, 2477|PHI:2477|CYP1|B8QZV4|5116|Cryphonectria parasitica|Reduced virulence, 249|PHI:249|CYP1|AAG13968|318829|Magnaporthe oryzae|Reduced virulence, 277|PHI:277|BCP1|AAQ16572|40559|Botrytis cinerea|Reduced virulence	P1609_94
2196|PHI:2196|MoRgs5|XP_363151|148305|Magnaporthe oryzae (related: Magnaporthe grisea)|Unaffected pathogenicity	P1609_5763, P1609_8256
2090|PHI:2090|Moatg29|MGG_02790|148305|Magnaporthe oryzae (related: Magnaporthe grisea)|Unaffected pathogenicity	P1609_2781
1460|PHI:1460|GzAra008|I1S2F6|5518|Gibberella zeae (related: Fusarium graminearum)|Unaffected pathogenicity	P1609_4326
128|PHI:128|SUM1|AAC34140|318829|Magnaporthe oryzae|Unaffected pathogenicity, 231|PHI:231|RPK1|AAK31209|5462|Colletotrichum lagenarium|Loss of pathogenicity, 2371|PHI:2371|bcpkaR|C0H5W5|40559|Botrytis cinerea|Reduced virulence	P1609_2094
2053|PHI:2053|Mstu1|0|148305|Magnaporthe oryzae (related: Magnaporthe grisea)|Loss of pathogenicity, 2065|PHI:2065|MSTU1|Q4R1B9|148305|Magnaporthe oryzae (related: Magnaporthe grisea)|Loss of pathogenicity, 2263|PHI:2263|StuA|Q0U086|13684|Phaeosphaeria nodorum (related: Stagonospora nodorum)|Reduced virulence, 776|PHI:776|MGG_00692|EDK02656|318829|Magnaporthe oryzae|Reduced virulence, 802|PHI:802…	P1609_8663
513|PHI:513|ARN1 (related: SIT1)|EAK97011|5476|Candida albicans|Reduced virulence	P1609_8064
2118|PHI:2118|MgSM1|MGG_05344|148305|Magnaporthe oryzae (related: Magnaporthe grisea)|Effector (plant avirulence determinant), 3164 | Sm1 | PHI:3164 | R9UM22 | 29875 | Trichoderma virens | mixed outcome, 695|PHI:695|SP1|AAM33130|5022|Leptosphaeria maculans|Unaffected pathogenicity	P1609_7297
2619|PHI:2619|tcdB|P18177|1496|Clostridium difficile|Unaffected pathogenicity, 3354 | rtxA1 | PHI:3354 | A0A023NA98 | 672 | Vibrio vulnificus | reduced virulence	P1609_8077
293|PHI:293|CPS1|AAG53991|5016|Cochliobolus heterostrophus|Reduced virulence, 295|PHI:295|CvCPS1|AAP87099|40125|Cochliobolus victoriae|Reduced virulence, 304|PHI:304|GzCPS1|AAP12366|5518|Fusarium graminearum|Reduced virulence	P1609_10633
2395|PHI:2395|GzSYN1|I1RBM2|5518|Gibberella zeae (related: Fusarium graminearum)|Reduced virulence	P1609_5327
1846|PHI:1846|GzZC161|I1S7A6|5518|Gibberella zeae (related: Fusarium graminearum)|Unaffected pathogenicity	P1609_381, P1609_386
1685|PHI:1685|GzRad003|I1S5Z3|5518|Gibberella zeae (related: Fusarium graminearum)|Unaffected pathogenicity	P1609_3208, P1609_8154
1164|PHI:1164|RRG1|I1RX94|5518|Gibberella zeae (related: Fusarium graminearum)|Reduced virulence, 189|PHI:189|SSK1|AAD55813|5476|Candida albicans|Loss of pathogenicity, 2405|PHI:2405|MoSSK1|G5EH08|148305|Magnaporthe oryzae (related: Magnaporthe grisea)|Reduced virulence	P1609_2662
2046|PHI:2046|MoMSB2|XP_369431.2|148305|Magnaporthe oryzae (related: Magnaporthe grisea)|Loss of pathogenicity, 2159|PHI:2159|MoMSB2|MGG_06033|148305|Magnaporthe oryzae (related: Magnaporthe grisea)|Reduced virulence, 2284|PHI:2284|Msb2|J9N257|5507|Fusarium oxysporum|Reduced virulence, 3208 | VdMsb | PHI:3208 | G2WS91 | 27337 | Verticillium dahliae | mixed outcome	P1609_6518
2545|PHI:2545|TIF35|Q4X1I3|746128|Aspergillus fumigatus|Mixed outcome	P1609_1838
257|PHI:257|GAS2|AAF74764|318829|Magnaporthe oryzae|Reduced virulence	P1609_5444, P1609_9123
3234 | MoLYS20 | PHI:3234 | G4NCG1 | 318829 | Magnaporthe oryzae | reduced virulence	P1609_9510
1207|PHI:1207|(Sc Kin1/Kin2)|I1RY42|5518|Gibberella zeae (related: Fusarium graminearum)|Reduced virulence, 3178 | FgKin1 | PHI:3178 | I1RY42 | 5518 | Fusarium graminearum | reduced virulence, 3179 | MoKIN1 | PHI:3179 | G4MY59 | 318829 | Magnaporthe oryzae | reduced virulence, 360|PHI:360|KIN1|AAW46354|5207|Cryptococcus neoformans|Reduced virulence	P1609_886
2656|PHI:2656|pmrF|D0ZPP5|90371|Salmonella enterica serovar Typhimurium|Reduced virulence	P1609_10917
1447|PHI:1447|GzGATA005|I1RUP1|5518|Gibberella zeae (related: Fusarium graminearum)|Unaffected pathogenicity	P1609_3467
1021|PHI:1021|CTF1|ABR12478|5507|Fusarium oxysporum|Unaffected pathogenicity, 1800|PHI:1800|GzZC115|I1RE61|5518|Gibberella zeae (related: Fusarium graminearum)|Unaffected pathogenicity, 2929|PHI:2929|ctf1|J9MMS5|59765|Fusarium oxysporum f. sp. Lycopersici|Reduced virulence, 2981|PHI:2981|Ctf1|A6N6J8|59765|Fusarium oxysporum f. sp. Lycopersici|Reduced virulence	P1609_1465
3037 | FgERG5A | PHI:3037 | I1RE80 | 5518 | Fusarium graminearum | reduced virulence, 3038 | FgERG5B | PHI:3038 | I1RIP4 | 5518 | Fusarium graminearum | reduced virulence	P1609_6504
2541|PHI:2541|OLE1|Q4WGR1|746128|Aspergillus fumigatus|Mixed outcome, 2564|PHI:2564|OLE1|G8BCQ2|5480|Candida parapsilosis|Reduced virulence, 2605|PHI:2605|hgc1|Q5ABE2 |746128|Aspergillus fumigatus|Mixed outcome, 32|PHI:32|OLE1|Q12619|5037|Histoplasma capsulatum|Unaffected pathogenicity	P1609_1411
2536|PHI:2536|MET2|Q4WU51|746128|Aspergillus fumigatus|Mixed outcome, 2597|PHI:2597|Pir32|Q59PW0 |746128|Aspergillus fumigatus|Mixed outcome, 3391 | FVEG_12519 | PHI:3391 | W7N293 | 117187 | Fusarium verticillioides | unaffected pathogenicity, 355|PHI:355|GzmetE||5518|Fusarium graminearum|Reduced virulence	P1609_1091
2044|PHI:2044|MoSOM1|XP_362263|148305|Magnaporthe oryzae (related: Magnaporthe grisea)|Loss of pathogenicity	P1609_11216
1463|PHI:1463|GzCCAAT003|I1RFW6|5518|Gibberella zeae (related: Fusarium graminearum)|Unaffected pathogenicity, 3054 | FvHAP5 | PHI:3054 | W7MQF2 | 117187 | Fusarium verticillioides | reduced virulence	P1609_8420
1353|PHI:1353|GzC2H013|I1RCM1|5518|Gibberella zeae (related: Fusarium graminearum)|Reduced virulence, 2048|PHI:2048|MoCRZ1|MGG_05133|148305|Magnaporthe oryzae (related: Magnaporthe grisea)|Reduced virulence, 2059|PHI:2059|MgCRZ1|MGG_05133.5|148305|Magnaporthe oryzae (related: Magnaporthe grisea)|Reduced virulence, 2509|PHI:2509|CrzA|Q4WJ81|746128|Aspergillus fumigatus|Loss of pathogenicity	P1609_10870
1058|PHI:1058|MoSNF1|ABF48563|318829|Magnaporthe oryzae|Reduced virulence, 1197|PHI:1197|(Snf1)|I1RZP6|5518|Gibberella zeae (related: Fusarium graminearum)|Reduced virulence, 188|PHI:188|SNF1|AAD43341|5017|Cochliobolus carbonum|Reduced virulence, 301|PHI:301|foSNF1|AAN32715|5507|Fusarium oxysporum|Reduced virulence, 3263 | MaSnf1 | PHI:3263 | E9E8J3 | 92637 | Metarhizium acridum | reduced virulen…	P1609_9815
2387|PHI:2387|ACL2|I1RPR1|5518|Gibberella zeae (related: Fusarium graminearum)|Loss of pathogenicity	P1609_7951, P1609_7961
1628|PHI:1628|FgFSR1|I1RDG9|5518|Gibberella zeae (related: Fusarium graminearum)|Reduced virulence, 2345|PHI:2345|FSR1|Q2TJF8|117187|Gibberella moniliformis (related: Fusarium verticillioides)|Loss of pathogenicity, 731|PHI:731|FSR1|AAX55652|5518|Fusarium graminearum|Reduced virulence	P1609_6410
541|PHI:541|LIP1|AAU87359|332648|Botrytis cinerea|Unaffected pathogenicity	P1609_8275
3385 | FVEG_12529 | PHI:3385 | W7MS09 | 117187 | Fusarium verticillioides | unaffected pathogenicity	P1609_1935
2202|PHI:2202|PdeH|D0ERY7|148305|Magnaporthe oryzae (related: Magnaporthe grisea)|Mixed outcome, 856|PHI:856|PDE2|EAL02391|5476|Candida albicans|Reduced virulence	P1609_10121
2428|PHI:2428|ypd1|F8UWJ7|5207|Cryptococcus neoformans|Lethal	P1609_1911
2334|PHI:2334|BcNma|E2GL14|40559|Botrytis cinerea|Reduced virulence	P1609_1450
1938|PHI:1938|GzZC253|I1RMZ4|5518|Gibberella zeae (related: Fusarium graminearum)|Unaffected pathogenicity, 1983|PHI:1983|GzZC298|I1RB90|5518|Gibberella zeae (related: Fusarium graminearum)|Lethal	P1609_1500
3119 | PSPTO_2696 | PHI:3119 | Q882D2 | 317 | Pseudomonas syringae | mixed outcome	P1609_12290, P1609_4980, P1609_7308
1771|PHI:1771|GzZC086|I1RX74|5518|Gibberella zeae (related: Fusarium graminearum)|Unaffected pathogenicity, 3308 | cnf1 | PHI:3308 | G4NLB5 | 318829 | Magnaporthe oryzae | mixed outcome	P1609_3087
1178|PHI:1178|(Sc Cdc28)|I1RW16|5518|Gibberella zeae (related: Fusarium graminearum)|Reduced virulence, 1266|PHI:1266|FGSG_12149|I1RH87|5518|Gibberella zeae (related: Fusarium graminearum)|Unaffected pathogenicity	P1609_976
981|PHI:981|hopI1|AAL84247|59511|Pseudomonas syringae|Effector (plant avirulence determinant)	P1609_9587
2200|PHI:2200|MoSLN1|G4MV04|148305|Magnaporthe oryzae (related: Magnaporthe grisea)|Loss of pathogenicity, 3163 | Mosln1 | PHI:3163 | G4MV04 | 318829 | Magnaporthe oryzae | reduced virulence, 3374 | FgSln1 | PHI:3374 | I1S028 | 5518 | Fusarium graminearum | reduced virulence	P1609_2069
235|PHI:235|VPH1|AAK81705|5207|Cryptococcus neoformans|Reduced virulence, 3369 | stv1 | PHI:3369 | Q59RL4 | 5476 | Candida albicans | unaffected pathogenicity, 3370 | vph1 | PHI:3370 | C4YGV6 | 5476 | Candida albicans | reduced virulence	P1609_5182
3065 | MoRga5 | PHI:3065 | G4MQQ3 | 318829 | Magnaporthe oryzae | mixed outcome	P1609_7504
1332|PHI:1332|GzbZIP014|I1RXD5|5518|Gibberella zeae (related: Fusarium graminearum)|Unaffected pathogenicity	P1609_5247
1284|PHI:1284|FGSG_13509|I1RI73|5518|Gibberella zeae (related: Fusarium graminearum)|Unaffected pathogenicity	P1609_11592, P1609_4614
1083|PHI:1083|CpkB|ABD59787|13684|Stagonospora nodorum|Unaffected pathogenicity, 1244|PHI:1244|FGSG_00792|I1RA20|5518|Gibberella zeae (related: Fusarium graminearum)|Unaffected pathogenicity, 2272|PHI:2272|CpkB|A9Z1V6|13684|Phaeosphaeria nodorum (related: Stagonospora nodorum)|Unaffected pathogenicity	P1609_9681
1330|PHI:1330|GzbZIP012|I1RUH0|5518|Gibberella zeae (related: Fusarium graminearum)|Unaffected pathogenicity	P1609_7385
2503|PHI:2503|AGS1|Q96UQ6|746128|Aspergillus fumigatus|Unaffected pathogenicity, 2504|PHI:2504|AGS2|Q96UR0|746128|Aspergillus fumigatus|Unaffected pathogenicity	P1609_11528
1803|PHI:1803|GzZC118|I1RUX9|5518|Gibberella zeae (related: Fusarium graminearum)|Unaffected pathogenicity, 1878|PHI:1878|GzZC193|I1RPF6|5518|Gibberella zeae (related: Fusarium graminearum)|Unaffected pathogenicity	P1609_11335
455|PHI:455|CAP59|AAC13946|5207|Cryptococcus neoformans|Loss of pathogenicity	P1609_1066, P1609_9059
3096 | Ktr4 | PHI:3096 | J5K093 | 176275 | Beauveria bassiana | reduced virulence	P1609_1717
1534|PHI:1534|GzMADS001|I1RWM0|5518|Gibberella zeae (related: Fusarium graminearum)|Unaffected pathogenicity, 2188|PHI:2188|MoMCM1|G4NJ14|148305|Magnaporthe oryzae (related: Magnaporthe grisea)|Mixed outcome, 3355 | Mads1 | PHI:3355 | W7LTW0 | 117187 | Fusarium verticillioides | mixed outcome	P1609_2801
2394|PHI:2394|Conserved hypothetical protein |I1S104|5518|Gibberella zeae (related: Fusarium graminearum)|Increased virulence (Hypervirulence)	P1609_9374
306|PHI:306|KEX2|AAB80929|5476|Candida albicans|Reduced virulence	P1609_3245
14|PHI:14|ADE2|AAB09711|5207|Cryptococcus neoformans|Loss of pathogenicity, 196|PHI:196|ADE2|AAC49755|5476|Candida albicans|Reduced virulence, 501|PHI:501|ADE2|CAA99327|4932|Saccharomyces cerevisiae|Reduced virulence	P1609_860
2278|PHI:2278|MeaB|J9MHC1|5507|Fusarium oxysporum|Unaffected pathogenicity, 2282|PHI:2282|MeaB|J9MHC1|5507|Fusarium oxysporum|Increased virulence (Hypervirulence)	P1609_10669
1025|PHI:1025|bcnoxR|CAP12326|40559|Botrytis cinerea|Reduced virulence, 2914|PHI:2914|AaNoxR|J7H6V8|5599|Alternaria alternata|Reduced virulence, 578|PHI:578|NoxR|BAF36501|35717|Epichloe festucae|Enhanced antagonism	P1609_10699
1433|PHI:1433|GzC2H102|I1S8E5|5518|Gibberella zeae (related: Fusarium graminearum)|Unaffected pathogenicity, 2051|PHI:2051|COS1|MGG_03977|148305|Magnaporthe oryzae (related: Magnaporthe grisea)|Increased virulence (Hypervirulence)	P1609_5215
597|PHI:597|LOPB|AAP40632|5022|Leptosphaeria maculans|Reduced virulence	P1609_10901
1887|PHI:1887|GzZC202|I1RHZ6|5518|Gibberella zeae (related: Fusarium graminearum)|Unaffected pathogenicity	P1609_11315, P1609_2147
3390 | FVEG_12520 | PHI:3390 | W7MT28 | 117187 | Fusarium verticillioides | unaffected pathogenicity	P1609_5412
2524|PHI:2524|nudC|Q70ZY8|746128|Aspergillus fumigatus|Lethal	P1609_3388
1309|PHI:1309|GzbHLH010|I1RNI6|5518|Gibberella zeae (related: Fusarium graminearum)|Lethal	P1609_1280
1239|PHI:1239|FGSG_12149|I1RFC7|5518|Gibberella zeae (related: Fusarium graminearum)|Unaffected pathogenicity	P1609_8429
1890|PHI:1890|GzZC205|I1RTH7|5518|Gibberella zeae (related: Fusarium graminearum)|Unaffected pathogenicity, 1945|PHI:1945|GzZC260|I1RGK4|5518|Gibberella zeae (related: Fusarium graminearum)|Unaffected pathogenicity	P1609_9230
1291|PHI:1291|TOP1|I1RRX4|5518|Gibberella zeae (related: Fusarium graminearum)|Reduced virulence, 80|PHI:80|TOP1|AAB39507|5476|Candida albicans|Reduced virulence	P1609_7452
1591|PHI:1591|GzOB031|I1RWQ7|5518|Gibberella zeae (related: Fusarium graminearum)|Reduced virulence, 356|PHI:356|HEX1|AAK98783|318829|Magnaporthe oryzae|Reduced virulence	P1609_2880
2586|PHI:2586|Pmt4|Q4P380|5270|Ustilago maydis|Reduced virulence, 2607|PHI:2607|Pmt4|Q4P380|5270|Ustilago maydis|Reduced virulence, 399|PHI:399|PMT4|EAK95207|5476|Candida albicans|Reduced virulence	P1609_255
2418|PHI:2418|CID1|I1RKF3|5518|Gibberella zeae (related: Fusarium graminearum)|Reduced virulence, 2419|PHI:2419|CID1|I1RKF3|5518|Gibberella zeae (related: Fusarium graminearum)|Reduced virulence	P1609_9531
1813|PHI:1813|GzZC128|I1RV20|5518|Gibberella zeae (related: Fusarium graminearum)|Unaffected pathogenicity, 3382 | FVEG_12532 | PHI:3382 | W7MS18 | 117187 | Fusarium verticillioides | unaffected pathogenicity	P1609_1501
1263|PHI:1263|FGSG_04770|I1RB84|5518|Gibberella zeae (related: Fusarium graminearum)|Unaffected pathogenicity	P1609_10307, P1609_4966, P1609_9960
1941|PHI:1941|GzZC256|I1RGD9|5518|Gibberella zeae (related: Fusarium graminearum)|Unaffected pathogenicity	P1609_11419
1193|PHI:1193|(Sc Sky1)|I1RGD6|5518|Gibberella zeae (related: Fusarium graminearum)|Reduced virulence	P1609_11439
2103|PHI:2103|Vacuolar calcium ion transporter|MGG_08710|148305|Magnaporthe oryzae (related: Magnaporthe grisea)|Unaffected pathogenicity	P1609_5745
2574|PHI:2574|Tc52|D3JLB9|5693|Trypanosoma cruzi|Unaffected pathogenicity, 2595|PHI:2595|Tc52|D3JLB9|5693|Trypanosoma cruzi|Unaffected pathogenicity	P1609_7264
2651|PHI:2651|yedX|Q8ZQ52|90371|Salmonella enterica serovar Typhimurium|Unaffected pathogenicity	P1609_6252
1559|PHI:1559|GzNEG001|I1RK21|5518|Gibberella zeae (related: Fusarium graminearum)|Unaffected pathogenicity, 1560|PHI:1560|GzNEG002|I1RTR8|5518|Gibberella zeae (related: Fusarium graminearum)|Unaffected pathogenicity	P1609_12980
1612|PHI:1612|GzP53L005|I1RZ82|5518|Gibberella zeae (related: Fusarium graminearum)|Unaffected pathogenicity	P1609_1101
1328|PHI:1328|GzbZIP010|I1RRD2|5518|Gibberella zeae (related: Fusarium graminearum)|Reduced virulence	P1609_10974, P1609_2622
194|PHI:194|URE1|AAC62257|5207|Cryptococcus neoformans|Reduced virulence	P1609_933
811|PHI:811|MGG_10510|EDK06580|318829|Magnaporthe oryzae|Reduced virulence	P1609_9015
2969|PHI:2969|argEF|Q4WCZ1|746128|Aspergillus fumigatus|Reduced virulence	P1609_2890
447|PHI:447|MCSA|CAI61947|5085|Aspergillus fumigatus|Reduced virulence	P1609_11753
1489|PHI:1489|GzHMG021|I1RSJ5|5518|Gibberella zeae (related: Fusarium graminearum)|Unaffected pathogenicity	P1609_1263
1833|PHI:1833|GzZC148|I1RK16|5518|Gibberella zeae (related: Fusarium graminearum)|Unaffected pathogenicity, 3307 | gpf1 | PHI:3307 | G4NII8 | 318829 | Magnaporthe oryzae | loss of pathogenicity, 3313 | gpf1 | PHI:3313 | G4NII8 | 318829 | Magnaporthe oryzae | loss of pathogenicity	P1609_4732
1935|PHI:1935|GzZC250|I1RFP7|5518|Gibberella zeae (related: Fusarium graminearum)|Unaffected pathogenicity	P1609_10101, P1609_6679
2087|PHI:2087|Moatg26|MGG_03459|148305|Magnaporthe oryzae (related: Magnaporthe grisea)|Unaffected pathogenicity	P1609_3549
2227|PHI:2227|pao|D4III8|5270|Ustilago maydis|Mixed outcome	P1609_6622
2834|PHI:2834|LAM1|C3PTB1|5016|Cochliobolus heterostrophus|Reduced virulence	P1609_5314
1561|PHI:1561|GzOB001|I1R9W2|5518|Gibberella zeae (related: Fusarium graminearum)|Unaffected pathogenicity, 2186|PHI:2186|PIC5|EHA49812 |148305|Magnaporthe oryzae (related: Magnaporthe grisea)|Reduced virulence	P1609_3238
504|PHI:504|LEU2|CAA42366|4932|Saccharomyces cerevisiae|Reduced virulence	P1609_10740, P1609_4719
1205|PHI:1205|(Sc CDC15)|I1RA39|5518|Gibberella zeae (related: Fusarium graminearum)|Reduced virulence	P1609_7511
3607 | sidN | PHI:3607 | K7NCV2 | 35717 | Epichloe festucae | increased virulence, 739|PHI:739|SSM1|AAX49357|318829|Magnaporthe oryzae|Reduced virulence	P1609_5456
3057 | VvpE | PHI:3057 | C3VHN8 | 672 | Vibrio vulnificus | mixed outcome	P1609_6701
2661|PHI:2661|MedA|Q4X0J5|746128|Aspergillus fumigatus|Reduced virulence, 375|PHI:375|REN1|BAC55015|5507|Fusarium oxysporum|Unaffected pathogenicity, 99|PHI:99|ACR1|BAC41196|318829|Magnaporthe oryzae|Loss of pathogenicity	P1609_4752
1235|PHI:1235|FGSG_04416|I1RWQ2|5518|Gibberella zeae (related: Fusarium graminearum)|Lethal	P1609_2738
1198|PHI:1198|(Sc Ssk2/Ssk22)|I1RA81|5518|Gibberella zeae (related: Fusarium graminearum)|Reduced virulence, 296|PHI:296|CZK3|AAP72037|135779|Cercospora zeae-maydis|Reduced virulence, 3323 | sskB | PHI:3323 | Q4WT11 | 746128 | Aspergillus fumigatus | loss of pathogenicity	P1609_8122
2583|PHI:2583|Rim13|Q4PCT8|5270|Ustilago maydis|Unaffected pathogenicity, 2604|PHI:2604|Rim13|Q4PCT8|5270|Ustilago maydis|Unaffected pathogenicity	P1609_4251
261|PHI:261|ICL1|AAM89498|5022|Leptosphaeria maculans|Reduced virulence, 305|PHI:305|ICL1|AAN28719|318829|Magnaporthe oryzae|Reduced virulence, 477|PHI:477|ICL1|EAK93039|5476|Candida albicans|Reduced virulence	P1609_6107
3312 | gta1 | PHI:3312 | G4MT75 | 318829 | Magnaporthe oryzae | reduced virulence	P1609_1884
799|PHI:799|MGG_03530|EDJ94565|318829|Magnaporthe oryzae|Reduced virulence	P1609_3476
1216|PHI:1216|FGSG_06420|I1RT48|5518|Gibberella zeae (related: Fusarium graminearum)|Reduced virulence, 2220|PHI:2220|don3|XP_761690|5270|Ustilago maydis|Reduced virulence	P1609_5206
2302|PHI:2302|CHS5|G4XVC0|148305|Magnaporthe oryzae (related: Magnaporthe grisea)|Loss of pathogenicity, 3049 | CSMB | PHI:3049 | Q4X0H7 | 746128 | Aspergillus fumigatus | mixed outcome, 3075 | PdChsVII | PHI:3075 | R4I3H8 | 36651 | Penicillium digitatum | reduced virulence, 389|PHI:389|Umchs6|AAB84285|5270|Ustilago maydis|Reduced virulence	P1609_6279
1757|PHI:1757|GzZC072|I1RYY1|5518|Gibberella zeae (related: Fusarium graminearum)|Unaffected pathogenicity	P1609_1398
1250|PHI:1250|FGSG_12887|I1RS33|5518|Gibberella zeae (related: Fusarium graminearum)|Unaffected pathogenicity, 2112|PHI:2112|Tos3|MGG_06421|148305|Magnaporthe oryzae (related: Magnaporthe grisea)|Unaffected pathogenicity, 3177 | MoTos3 | PHI:3177 | G4N7H1 | 318829 | Magnaporthe oryzae | mixed outcome	P1609_4156
1900|PHI:1900|GzZC215|I1RND0|5518|Gibberella zeae (related: Fusarium graminearum)|Unaffected pathogenicity, 2307|PHI:2307|ftf1 |Q2V9X3|5507|Fusarium oxysporum|Unaffected pathogenicity, 2989|PHI:2989|MGG_06243.6|G4N8I4|148305|Magnaporthe oryzae|Reduced virulence	P1609_4350
2141|PHI:2141|CDC15|XP_001406795|148305|Magnaporthe oryzae (related: Magnaporthe grisea)|Loss of pathogenicity, 773|PHI:773|MGG_11899|EDJ98555|318829|Magnaporthe oryzae|Reduced virulence, 791|PHI:791|MGG_11899|EDJ98555|318829|Magnaporthe oryzae|Reduced virulence	P1609_8872
1070|PHI:1070|MIG1|ABX79379|318829|Magnaporthe oryzae|Loss of pathogenicity, 1536|PHI:1536|GzMADS003|I1RY98|5518|Gibberella zeae (related: Fusarium graminearum)|Reduced virulence, 3356 | Mads2 | PHI:3356 | W7M2E5 | 117187 | Fusarium verticillioides | mixed outcome	P1609_794
3411 | bscN | PHI:3411 | O68539 | 518 | Bordetella bronchiseptica | reduced virulence, 4613 | esaN | PHI:4613 | D0ZDL7 | 636 | Edwardsiella tarda | mixed outcome, 645|PHI:645|invC|AAL21774|216597|Salmonella enterica|Reduced virulence	P1609_3882
120|PHI:120|PTH2|AAB88887|318829|Magnaporthe oryzae|Loss of pathogenicity, 2911|PHI:2911|Ss-pth2|A7F6V9|5180|Sclerotinia sclerotiorum |Reduced virulence, 594|PHI:594|CrAT1 (related: PTH2)|AAB88887|318829|Magnaporthe oryzae|Loss of pathogenicity	P1609_1338
3062 | MoRga2 | PHI:3062 | G4N7K5 | 318829 | Magnaporthe oryzae | mixed outcome	P1609_4191
104|PHI:104|CaMNT1|CAA67930|5476|Candida albicans|Reduced virulence, 3095 | Ktr1 | PHI:3095 | J5JDI1 | 176275 | Beauveria bassiana | unaffected pathogenicity, 3453 | ktr3 | PHI:3453 | Q5KM27 | 5207 | Cryptococcus neoformans | reduced virulence, 392|PHI:392|CaMNT2|CAA61538|5476|Candida albicans|Reduced virulence	P1609_5723
182|PHI:182|RAS1|AAD55937|5207|Cryptococcus neoformans|Loss of pathogenicity, 3280 | CoRAS1 | PHI:3280 | N4VQQ5 | 5465 | Colletotrichum orbiculare |, 507|PHI:507|CaRAS1|AAF03566|5476|Candida albicans|Reduced virulence	P1609_6344
1663|PHI:1663|GzCCHC003|I1RFZ8|5518|Gibberella zeae (related: Fusarium graminearum)|Unaffected pathogenicity, 2189|PHI:2189|MoGIS2|G4MRA3|148305|Magnaporthe oryzae (related: Magnaporthe grisea)|Reduced virulence	P1609_11212
1657|PHI:1657|GzCCCH001|I1RF25|5518|Gibberella zeae (related: Fusarium graminearum)|Unaffected pathogenicity, 1660|PHI:1660|GzCCCH004|I1S4C9|5518|Gibberella zeae (related: Fusarium graminearum)|Unaffected pathogenicity	P1609_12731
1180|PHI:1180|(Sc Sat4)|I1RS32|5518|Gibberella zeae (related: Fusarium graminearum)|Reduced virulence	P1609_4157, P1609_6680
1396|PHI:1396|GzC2H059|I1RUM9|5518|Gibberella zeae (related: Fusarium graminearum)|Reduced virulence, 2607|PHI:2607|DVRA|Q4WXK4|746128|Aspergillus fumigatus|Mixed outcome, 795|PHI:795|MGG_03451|EDJ94656|318829|Magnaporthe oryzae|Reduced virulence	P1609_3558
1466|PHI:1466|GzCCAAT006|I1RSG9|5518|Gibberella zeae (related: Fusarium graminearum)|Unaffected pathogenicity, 3053 | FvHAP3 | PHI:3053 | W7MB59 | 117187 | Fusarium verticillioides | reduced virulence	P1609_1272
907|PHI:907|um02473||5270|Ustilago maydis|Loss of pathogenicity	P1609_12119, P1609_5829, P1609_6113
2155|PHI:2155|MoPEX7|B8Q8Z5|148305|Magnaporthe oryzae (related: Magnaporthe grisea)|Loss of pathogenicity, 2716|PHI:2716|PEX7 |V6R9T0|5518|Fusarium graminearum|Unaffected pathogenicity, 772|PHI:772|MGG_01481|EDK04805|318829|Magnaporthe oryzae|Loss of pathogenicity, 797|PHI:797|MGG_01481|EDK04805|318829|Magnaporthe oryzae|Reduced virulence	P1609_1106
2924|PHI:2924|lip1|J9MXG1|59765|Fusarium oxysporum f. sp. Lycopersici|Unaffected pathogenicity, 432|PHI:432|FGL1|AAQ23181|5518|Fusarium graminearum|Reduced virulence	P1609_7653
1388|PHI:1388|GzC2H051|I1RT91|5518|Gibberella zeae (related: Fusarium graminearum)|Unaffected pathogenicity	P1609_7730
782|PHI:782|MGG_02423|EDJ98620|318829|Magnaporthe oryzae|Loss of pathogenicity, 796|PHI:796|MGG_02423|EDJ98620|318829|Magnaporthe oryzae|Reduced virulence	P1609_8936
1415|PHI:1415|GzC2H082|I1RZZ5|5518|Gibberella zeae (related: Fusarium graminearum)|Unaffected pathogenicity, 1438|PHI:1438|GzC2H107|I1SAT3|5518|Gibberella zeae (related: Fusarium graminearum)|Unaffected pathogenicity	P1609_9585
2092|PHI:2092|Cch1|MGG_05643|148305|Magnaporthe oryzae (related: Magnaporthe grisea)|Reduced virulence, 3206 | Cch1 | PHI:3206 | B0XQN0 | 746128 | Aspergillus fumigatus | mixed outcome	P1609_10145
2915|PHI:2915|Ppr1|W7LRW9|117187|Fusarium verticillioides|Unaffected pathogenicity	P1609_10152
901|PHI:901|um01886||5270|Ustilago maydis|Unaffected pathogenicity	P1609_10122
1259|PHI:1259|FGSG_03499|I1RNK3|5518|Gibberella zeae (related: Fusarium graminearum)|Unaffected pathogenicity, 2940|PHI:2940|MoARK1|G4MV67|148305|Magnaporthe oryzae|Reduced virulence	P1609_595
506|PHI:506|URA3|AAA34824|4932|Saccharomyces cerevisiae|Reduced virulence	P1609_5146
254|PHI:254|FOW1|BAB85760|5507|Fusarium oxysporum|Reduced virulence	P1609_1943
3029 | PMT2 | PHI:3029 | Q5KAF1 | 5207 | Cryptococcus neoformans | increased virulence, 454|PHI:454|PMT2|EAL01044|5476|Candida albicans|Reduced virulence	P1609_1930
273|PHI:273|SPT3|AAD33888|5476|Candida albicans|Loss of pathogenicity	P1609_1383
1134|PHI:1134|ipa|B0LLU0|5022|Leptosphaeria maculans|Increased virulence (Hypervirulence), 891|PHI:891|MGG_01748|EDK04531|318829|Magnaporthe oryzae|Reduced virulence	P1609_1364
2728|PHI:2728|FgERG4|I1RZZ3|5518|Fusarium graminearum|Reduced virulence	P1609_8883
2101|PHI:2101|Vacuolar calcium ion transporter|MGG_11454|148305|Magnaporthe oryzae (related: Magnaporthe grisea)|Unaffected pathogenicity	P1609_9603
2251|PHI:2251|Gox1|Q696X2|13684|Phaeosphaeria nodorum (related: Stagonospora nodorum)|Unaffected pathogenicity, 414|PHI:414|GOX1|AAT73077|13684|Stagonospora nodorum|Unaffected pathogenicity	P1609_8569
2094|PHI:2094|Yvc1|MGG_09828|148305|Magnaporthe oryzae (related: Magnaporthe grisea)|Mixed outcome, 3207 | Yvc1 | PHI:3207 | A1CLC0 | 746128 | Aspergillus fumigatus | reduced virulence	P1609_4735
2866|PHI:2866|ORF19.3625|Q59Y24|5476|Candida albicans|Reduced virulence	P1609_1254
2075|PHI:2075|Moatg7|MGG_07297|148305|Magnaporthe oryzae (related: Magnaporthe grisea)|Loss of pathogenicity	P1609_2052
1212|PHI:1212|FGSG_12149|I1RCJ5|5518|Gibberella zeae (related: Fusarium graminearum)|Reduced virulence, 2407|PHI:2407|MoRIM15|G4NCR0|148305|Magnaporthe oryzae (related: Magnaporthe grisea)|Reduced virulence	P1609_8309
1203|PHI:1203|(Sc Yck1/2/3)|I1S050|5518|Gibberella zeae (related: Fusarium graminearum)|Reduced virulence	P1609_1632
216|PHI:216|HDC1|AAK35180|5017|Cochliobolus carbonum|Reduced virulence, 260|PHI:260|HDA1|AAM15960|5270|Ustilago maydis|Unaffected pathogenicity	P1609_6723
624|PHI:624|ssaN|AAO68935|216597|Salmonella enterica|Reduced virulence	P1609_10585
2353|PHI:2353|AMT1|XP_381310|5518|Gibberella zeae (related: Fusarium graminearum)|Reduced virulence	P1609_5120
2235|PHI:2235|Pit1|Q4P9P1|5270|Ustilago maydis|reduced virulence, 2236|PHI:2236|Pit2|Q4P9P1|5270|Ustilago maydis|reduced virulence, 2237|PHI:2237|Rbf1|Q4P9P1|5270|Ustilago maydis|Loss of pathogenicity	P1609_5155
1469|PHI:1469|GzHMG001|I1R9Z0|5518|Gibberella zeae (related: Fusarium graminearum)|Unaffected pathogenicity	P1609_3816
1610|PHI:1610|GzP53L003|I1RSN1|5518|Gibberella zeae (related: Fusarium graminearum)|Unaffected pathogenicity	P1609_8694
1645|PHI:1645|GzWing017|I1RTD1|5518|Gibberella zeae (related: Fusarium graminearum)|Unaffected pathogenicity, 3064 | MoRga4 | PHI:3064 | G4N1D0 | 318829 | Magnaporthe oryzae | mixed outcome	P1609_6249
1551|PHI:1551|GzMyb015|I1RZG7|5518|Gibberella zeae (related: Fusarium graminearum)|Unaffected pathogenicity, 2991|PHI:2991|MGG_01426.6|Q52G60|148305|Magnaporthe oryzae|Reduced virulence	P1609_1044
1170|PHI:1170|HDF3|I1RNQ2|5518|Gibberella zeae (related: Fusarium graminearum)|Unaffected pathogenicity, 1174|PHI:1174|HDF3|I1RNQ2|5518|Gibberella zeae (related: Fusarium graminearum)|Reduced virulence	P1609_6508
286|PHI:286|CLC-A|AAO73005|5207|Cryptococcus neoformans|Reduced virulence	P1609_6436
1326|PHI:1326|GzbZIP008|I1RPG1|5518|Gibberella zeae (related: Fusarium graminearum)|Unaffected pathogenicity, 2512|PHI:2512|HapX|Q4WER3 |746128|Aspergillus fumigatus|Reduced virulence	P1609_6595
831|PHI:831|ERG2|CAA80454|318829|Magnaporthe oryzae|chemistry target, 832|PHI:832|ERG2|CAA78959|5270|Ustilago maydis|chemistry target	P1609_11277
1606|PHI:1606|GzOB047|I1S8E2|5518|Gibberella zeae (related: Fusarium graminearum)|Reduced virulence, 804|PHI:804|MGG_08628|EDJ94907|318829|Magnaporthe oryzae|Reduced virulence	P1609_11281
1596|PHI:1596|GzOB036|I1RXD4|5518|Gibberella zeae (related: Fusarium graminearum)|Unaffected pathogenicity	P1609_5248
1225|PHI:1225|FGSG_12132|I1RP25|5518|Gibberella zeae (related: Fusarium graminearum)|Lethal, 2691|PHI:2691|IRE1|Q6FUI3|5478|Candida glabrata|Reduced virulence	P1609_9282
1306|PHI:1306|GzbHLH007|I1RGF4|5518|Gibberella zeae (related: Fusarium graminearum)|Unaffected pathogenicity	P1609_11461
1621|PHI:1621|GzRUM1|I1RP98|5518|Gibberella zeae (related: Fusarium graminearum)|Unaffected pathogenicity, 187|PHI:187|RUM1|AAG02418|5270|Ustilago maydis|Loss of pathogenicity	P1609_6128
1765|PHI:1765|GzZC080|I1RY91|5518|Gibberella zeae (related: Fusarium graminearum)|Unaffected pathogenicity	P1609_10572, P1609_9046
1194|PHI:1194|(Sc Mkk1/Mkk2)|I1RT06|5518|Gibberella zeae (related: Fusarium graminearum)|Reduced virulence, 4468 | mkkA | PHI:4468 | A0A068BFA5 | 35717 | Epichloe festucae | effector (plant avirulence determinant)	P1609_4094
1034|PHI:1034|Cpcat1|CAA04716|5111|Claviceps purpurea|Unaffected pathogenicity, 542|PHI:542|BCCAT2|AAK77951|40559|Botrytis cinerea|Unaffected pathogenicity	P1609_4136
2029|PHI:2029|TGL2|G4NEK6|148305|Magnaporthe oryzae (related: Magnaporthe grisea)|Unaffected pathogenicity	P1609_8748
1680|PHI:1680|GzMIZ002|I1S004|5518|Gibberella zeae (related: Fusarium graminearum)|Unaffected pathogenicity	P1609_2311, P1609_8200
1420|PHI:1420|GzC2H088|I1S172|5518|Gibberella zeae (related: Fusarium graminearum)|Unaffected pathogenicity, 2641|PHI:2641|CRZ1|C4Y985|36911|Candida lusitaniae|Reduced virulence	P1609_79
1200|PHI:1200|(Gsk3)|I1RT36|5518|Gibberella zeae (related: Fusarium graminearum)|Reduced virulence	P1609_5210
1417|PHI:1417|GzC2H084|I1S0W0|5518|Gibberella zeae (related: Fusarium graminearum)|Unaffected pathogenicity	P1609_12812, P1609_2017
1546|PHI:1546|GzMyb010|Q4IB96|5518|Gibberella zeae (related: Fusarium graminearum)|Lethal, 2986|PHI:2986|MGG_06434.6|G4N7A6|148305|Magnaporthe oryzae|Unaffected pathogenicity	P1609_4145
1507|PHI:1507|GzHOME002|I1RNA7|5518|Gibberella zeae (related: Fusarium graminearum)|Unaffected pathogenicity, 2131|PHI:2131|MoHox7|MGG_12865|148305|Magnaporthe oryzae (related: Magnaporthe grisea)|Loss of pathogenicity	P1609_4309
1303|PHI:1303|GzbHLH004|I1RC70|5518|Gibberella zeae (related: Fusarium graminearum)|Unaffected pathogenicity	P1609_172
3629 | Rv0392c | PHI:3629 | P95200 | 1773 | Mycobacterium tuberculosis | unaffected pathogenicity	P1609_8773
329|PHI:329|BcPLS1|CAD43406|40559|Botrytis cinerea|Loss of pathogenicity, 429|PHI:429|ClPLS1|CAD43407|290576|Colletotrichum lindemuthianum|Loss of pathogenicity	P1609_2803
1403|PHI:1403|GzC2H066|I1RWF1|5518|Gibberella zeae (related: Fusarium graminearum)|Reduced virulence, 2996|PHI:2996|MGG_06507.6|G4N6W9|148305|Magnaporthe oryzae|Reduced virulence	P1609_4067
207|PHI:207|CaNAG2|BAB43813|5476|Candida albicans|Reduced virulence, 214|PHI:214|DAC1|AAF04335|5476|Candida albicans|Reduced virulence	P1609_8640
1611|PHI:1611|GzP53L004|I1RVV2|5518|Gibberella zeae (related: Fusarium graminearum)|Unaffected pathogenicity	P1609_8638
208|PHI:208|CaNAG5|BAB43816|5476|Candida albicans|Reduced virulence, 217|PHI:217|HXK1|EAK93243|5476|Candida albicans|Reduced virulence	P1609_8637
3101 | BCKDH | PHI:3101 | Q8IEJ6 | 5833 | Plasmodium falciparum | reduced virulence, 3102 | BCKDH | PHI:3102 | Q1KSF2 | 5811 | Toxoplasma gondii | reduced virulence	P1609_5059
2590|PHI:2590|CMLE|H9C592|59765|Fusarium oxysporum f. sp. Lycopersici|Loss of pathogenicity, 2611|PHI:2611|CMLE|H9C592|59765|Fusarium oxysporum f. sp. Lycopersici|Loss of pathogenicity	P1609_944
1346|PHI:1346|GzC2H006|I1RB57|5518|Gibberella zeae (related: Fusarium graminearum)|Unaffected pathogenicity	P1609_4961
2074|PHI:2074|Moatg6|MGG_03694|148305|Magnaporthe oryzae (related: Magnaporthe grisea)|Loss of pathogenicity	P1609_3292
1597|PHI:1597|GzOB037|I1RYF6|5518|Gibberella zeae (related: Fusarium graminearum)|Unaffected pathogenicity	P1609_3350
1241|PHI:1241|FGSG_07816|I1RAE2|5518|Gibberella zeae (related: Fusarium graminearum)|Unaffected pathogenicity	P1609_864
2007|PHI:2007|HOS4|EDK06449|148305|Magnaporthe oryzae (related: Magnaporthe grisea)|Unaffected pathogenicity, 2009|PHI:2009|HOS4|EDK06449|148305|Magnaporthe oryzae (related: Magnaporthe grisea)|Unaffected pathogenicity	P1609_10050
2514|PHI:2514|PFS2|Q4X1Y0|746128|Aspergillus fumigatus|Lethal	P1609_10649
1506|PHI:1506|GzHOME001|I1RC01|5518|Gibberella zeae (related: Fusarium graminearum)|Unaffected pathogenicity, 2129|PHI:2129|MoHox6|MGG_11712|148305|Magnaporthe oryzae (related: Magnaporthe grisea)|reduced virulence	P1609_7414
2294|PHI:2294|FgFRP1|I1RCK7|5518|Gibberella zeae (related: Fusarium graminearum)|Mixed outcome, 490|PHI:490|FRP1|AAT85969|5507|Fusarium oxysporum|Loss of pathogenicity	P1609_4237
2006|PHI:2006|HST1|EDJ98541|148305|Magnaporthe oryzae (related: Magnaporthe grisea)|Unaffected pathogenicity, 2008|PHI:2008|HST1|EDJ98541|148305|Magnaporthe oryzae (related: Magnaporthe grisea)|Unaffected pathogenicity	P1609_8859
121|PHI:121|PTH3|AAB88888|318829|Magnaporthe oryzae|Loss of pathogenicity, 2516|PHI:2516|HIS3|Q4WDG8|746128|Aspergillus fumigatus|Lethal	P1609_6970
2153|PHI:2153|MoHyr1|MGG_07460|148305|Magnaporthe oryzae (related: Magnaporthe grisea)|Reduced virulence, 2356|PHI:2356|MoHYR1|G4N178|148305|Magnaporthe oryzae (related: Magnaporthe grisea)|Reduced virulence	P1609_7024
1071|PHI:1071|Gas1|CAF05793|5270|Ustilago maydis|Loss of pathogenicity, 526|PHI:526|GAS1|CAF05793|5270|Ustilago maydis|Reduced virulence	P1609_11276
3225 | Ndo1 | PHI:3225 | T2C913 | 36651 | Penicillium digitatum | unaffected pathogenicity	P1609_2145
4588 | AvrBs2 | PHI:4588 | G7TIV7 | 347 | Xanthomonas oryzae | mixed outcome	P1609_5349
1479|PHI:1479|GzHMG011|I1RD01|5518|Gibberella zeae (related: Fusarium graminearum)|Unaffected pathogenicity	P1609_3233
3024 | Cln1 | PHI:3024 | J9VV14 | 5207 | Cryptococcus neoformans | unaffected pathogenicity, 524|PHI:524|CLN1|AAY42143|5270|Ustilago maydis|Loss of pathogenicity	P1609_3400
2551|PHI:2551|NOC3|CNAG_00193.2|746128|Aspergillus fumigatus|Mixed outcome, 2600|PHI:2600|GAT1|Q4WZG4|746128|Aspergillus fumigatus|Mixed outcome	P1609_8782
1556|PHI:1556|GzNH001|I1RZY2|5518|Gibberella zeae (related: Fusarium graminearum)|Reduced virulence	P1609_2077
2002|PHI:2002|TIG1|MGG-03198.5|148305|Magnaporthe oryzae (related: Magnaporthe grisea)|Loss of pathogenicity, 446|PHI:446|TBL1||5518|Fusarium graminearum|Reduced virulence	P1609_3832
2459|PHI:2459|nlpI|D4ICB6|552|Erwinia amylovora|Reduced virulence, 320|PHI:320|SSN6|AAL54912|5476|Candida albicans|Reduced virulence	P1609_3835
1451|PHI:1451|GzGH|I1RQL1|5518|Gibberella zeae (related: Fusarium graminearum)|Unaffected pathogenicity	P1609_9766
368|PHI:368|NOT4|AAF66693|5476|Candida albicans|Reduced virulence	P1609_941
2218|PHI:2218|drf1|XP_757288|5270|Ustilago maydis|Reduced virulence	P1609_5300
1211|PHI:1211|FGSG_06970|I1RRQ8|5518|Gibberella zeae (related: Fusarium graminearum)|Reduced virulence	P1609_2046
2517|PHI:2517|TRPS|Q4X0J6|746128|Aspergillus fumigatus|Lethal	P1609_4033
2082|PHI:2082|Moatg16|MGG_05255|148305|Magnaporthe oryzae (related: Magnaporthe grisea)|Loss of pathogenicity	P1609_10725
2067|PHI:2067|ABC4|MGG_00937|148305|Magnaporthe oryzae (related: Magnaporthe grisea)|Loss of pathogenicity	P1609_9671
1585|PHI:1585|GzOB025|I1RS43|5518|Gibberella zeae (related: Fusarium graminearum)|Unaffected pathogenicity	P1609_4115
1381|PHI:1381|GzC2H044|I1RRI0|5518|Gibberella zeae (related: Fusarium graminearum)|Unaffected pathogenicity	P1609_398
1892|PHI:1892|GzZC207|I1RRH8|5518|Gibberella zeae (related: Fusarium graminearum)|Unaffected pathogenicity	P1609_396
2113|PHI:2113|Kin4|MGG_01196|148305|Magnaporthe oryzae (related: Magnaporthe grisea)|Mixed outcome	P1609_785
1565|PHI:1565|GzOB005|I1RBF6|5518|Gibberella zeae (related: Fusarium graminearum)|Unaffected pathogenicity	P1609_8097
1728|PHI:1728|GzZC043|I1S5L3|5518|Gibberella zeae (related: Fusarium graminearum)|Unaffected pathogenicity, 1889|PHI:1889|GzZC204|I1RHX4|5518|Gibberella zeae (related: Fusarium graminearum)|Unaffected pathogenicity	P1609_2685
225|PHI:225|PEP5|AAK16922|140110|Nectria haematococca (related: Fusarium solani)|Reduced virulence	P1609_1007
2747|PHI:2747|Cnt|A8YZD7|1280|Staphylococcus aureus|Reduced virulence	P1609_7147
1485|PHI:1485|GzHMG017|I1RMP0|5518|Gibberella zeae (related: Fusarium graminearum)|Unaffected pathogenicity	P1609_6089
1921|PHI:1921|GzZC236|I1RCH8|5518|Gibberella zeae (related: Fusarium graminearum)|Reduced virulence	P1609_10090
1304|PHI:1304|GzbHLH005|I1RCJ0|5518|Gibberella zeae (related: Fusarium graminearum)|Reduced virulence	P1609_10076
2248|PHI:2248|Als1|Q1L2E2|13684|Phaeosphaeria nodorum (related: Stagonospora nodorum)|Mixed outcome, 595|PHI:595|ALS1|AAZ95011|13684|Stagonospora nodorum|Reduced virulence	P1609_4131
1412|PHI:1412|GzC2H079|I1RZ85|5518|Gibberella zeae (related: Fusarium graminearum)|Unaffected pathogenicity, 2455|PHI:2455|CRE1|J9MZK9|59765|Fusarium oxysporum f. sp. Lycopersici|Unaffected pathogenicity	P1609_1094
2045|PHI:2045|MoCDTF1|XP_001413674|148305|Magnaporthe oryzae (related: Magnaporthe grisea)|Loss of pathogenicity, 2168|PHI:2168|Hypothetical protein|MGG_11346|148305|Magnaporthe oryzae (related: Magnaporthe grisea)|Reduced virulence	P1609_493
1967|PHI:1967|GzZC282|I1RB16|5518|Gibberella zeae (related: Fusarium graminearum)|Reduced virulence	P1609_8582
2520|PHI:2520|LYS4|Q4WUL6 |746128|Aspergillus fumigatus|Lethal, 362|PHI:362|LYSF|CAC48042|5085|Aspergillus fumigatus|Loss of pathogenicity	P1609_6169
1511|PHI:1511|GzHOME009|I1RXF3|5518|Gibberella zeae (related: Fusarium graminearum)|Reduced virulence, 2128|PHI:2128|MoHox1|MGG_04853|148305|Magnaporthe oryzae (related: Magnaporthe grisea)|reduced virulence	P1609_6157
269|PHI:269|RAS2|AAO19639|5270|Ustilago maydis|Loss of pathogenicity, 3279 | CoRAS2 | PHI:3279 | N4UYN1 | 5465 | Colletotrichum orbiculare | reduced virulence	P1609_6216
1210|PHI:1210|FGSG_01058|I1S077|5518|Gibberella zeae (related: Fusarium graminearum)|Reduced virulence	P1609_8733
197|PHI:197|ALO1|AAC98913|5476|Candida albicans|Reduced virulence	P1609_2891
3098 | URA4 | PHI:3098 | J9VJS8 | 5207 | Cryptococcus neoformans | reduced virulence	P1609_2936
805|PHI:805|MGG_00124|EDK03309|318829|Magnaporthe oryzae|Reduced virulence	P1609_8055
2326|PHI:2326|PTC1|I1RJS9|5518|Gibberella zeae (related: Fusarium graminearum)|Reduced virulence, 2491|PHI:2491|FgPTC1|I1RJS9|5518|Gibberella zeae (related: Fusarium graminearum)|Reduced virulence	P1609_10782
2121|PHI:2121|MST50p|MGG_05199|148305|Magnaporthe oryzae (related: Magnaporthe grisea)|Loss of pathogenicity, 3375 | FgSte50 | PHI:3375 | I1RJR9 | 5518 | Fusarium graminearum | loss of pathogenicity	P1609_10791
2160|PHI:2160|MoSHO1|MGG_09125|148305|Magnaporthe oryzae (related: Magnaporthe grisea)|Reduced virulence, 3373 | FgSho1 | PHI:3373 | I1RYI2 | 5518 | Fusarium graminearum | reduced virulence	P1609_2522
1418|PHI:1418|GzC2H085|I1S0W9|5518|Gibberella zeae (related: Fusarium graminearum)|Lethal, 2990|PHI:2990|MGG_02474.6|G4MRY7|148305|Magnaporthe oryzae|Reduced virulence	P1609_8875
1166|PHI:1166|ATG15|I1RFN8|5518|Gibberella zeae (related: Fusarium graminearum)|Reduced virulence, 2081|PHI:2081|Moatg15|MGG_12828|148305|Magnaporthe oryzae (related: Magnaporthe grisea)|Loss of pathogenicity	P1609_4101
1656|PHI:1656|GzYL|I1RFN9|5518|Gibberella zeae (related: Fusarium graminearum)|Lethal	P1609_4100
781|PHI:781|MGG_00131|EDK03302|318829|Magnaporthe oryzae|Reduced virulence	P1609_8062
2020|PHI:2020|Tup1|XP_759427|5270|Ustilago maydis|Mixed outcome, 211|PHI:211|CaTUP1|AAB63195|5476|Candida albicans|Reduced virulence	P1609_555
1186|PHI:1186|(Sc Cdc15)|I1S0Y9|5518|Gibberella zeae (related: Fusarium graminearum)|Reduced virulence, 2161|PHI:2161|37135|MGG_04100|148305|Magnaporthe oryzae (related: Magnaporthe grisea)|Loss of pathogenicity	P1609_5338
2849|PHI:2849|cutA|Q99174|70790|Fusarium solani f. sp. cucurbitae|Unaffected pathogenicity	P1609_5690
1652|PHI:1652|GzWing024|I1S219|5518|Gibberella zeae (related: Fusarium graminearum)|Unaffected pathogenicity	P1609_3998
1245|PHI:1245|FGSG_01559|I1RTL1|5518|Gibberella zeae (related: Fusarium graminearum)|Unaffected pathogenicity	P1609_8719
2089|PHI:2089|Moatg28|MGG_08061|148305|Magnaporthe oryzae (related: Magnaporthe grisea)|Unaffected pathogenicity	P1609_1600
3134 | pykF | PHI:3134 | Q66A26 | 633 | Yersinia pseudotuberculosis | reduced virulence	P1609_1602
1917|PHI:1917|GzZC232|I1RSE9|5518|Gibberella zeae (related: Fusarium graminearum)|Reduced virulence, 3613 | ProA | PHI:3613 | N0DU70 | 35717 | Epichloe festucae | increased virulence	P1609_8445
2073|PHI:2073|Moatg5|MGG_09262|148305|Magnaporthe oryzae (related: Magnaporthe grisea)|Loss of pathogenicity, 2091|PHI:2091|MgATG5|EF486491|148305|Magnaporthe oryzae (related: Magnaporthe grisea)|Loss of pathogenicity	P1609_7551
877|PHI:877|MGG_00383|EDK03005|318829|Magnaporthe oryzae|Reduced virulence	P1609_8346
1413|PHI:1413|GzC2H080|I1RZD4|5518|Gibberella zeae (related: Fusarium graminearum)|Unaffected pathogenicity	P1609_1397
2570|PHI:2570|CYB2|Q6FM61|5478|Candida glabrata|Reduced virulence	P1609_1340
2819|PHI:2819|CaEss1|G1UA02|5476|Candida albicans|Reduced virulence, 436|PHI:436|ESS1|AAN03477|5207|Cryptococcus neoformans|Reduced virulence	P1609_12432
609|PHI:609|sseA|AAO68047|216597|Salmonella enterica|Reduced virulence, 616|PHI:616|sseA|AAO68047|216597|Salmonella enterica|Reduced virulence	P1609_5325
2017|PHI:2017|COM1|MGG_01215|148305|Magnaporthe oryzae (related: Magnaporthe grisea)|Reduced virulence	P1609_808
2321|PHI:2321|SidI|Q4WR83|746128|Aspergillus fumigatus|Reduced virulence	P1609_12033
1909|PHI:1909|GzZC224|I1RHG6|5518|Gibberella zeae (related: Fusarium graminearum)|Unaffected pathogenicity	P1609_1400
1453|PHI:1453|GzAra001|I1RA50|5518|Gibberella zeae (related: Fusarium graminearum)|Lethal	P1609_213
510|PHI:510|CaNAG3|EAK93097|5476|Candida albicans|Reduced virulence, 511|PHI:511|CaNAG4|EAK93098|5476|Candida albicans|Reduced virulence	P1609_5395
2280|PHI:2280|Velvet protein family|J9MAX2|5507|Fusarium oxysporum|Reduced virulence, 2427|PHI:2427|FgVELB|I1RCN9|5518|Gibberella zeae (related: Fusarium graminearum)|Reduced virulence	P1609_1243
1647|PHI:1647|GzWing019|I1RWA9|5518|Gibberella zeae (related: Fusarium graminearum)|Reduced virulence, 675|PHI:675|ROM2|AAW45289|192011|Cryptococcus neoformans|Increased virulence (Hypervirulence)	P1609_2578
195|PHI:195|VPS34|CAA70254|5476|Candida albicans|Loss of pathogenicity, 3287 | CgVps34 | PHI:3287 | Q6FSR7 | 5478 | Candida glabrata | reduced virulence	P1609_2574
27|PHI:27|CAP20|AAA77678|5457|Colletotrichum gloeosporioides|Loss of pathogenicity	P1609_8957
3272 | glpD | PHI:3272 | Q8CWG4 | 992166 | Yersinia pestis | unaffected pathogenicity	P1609_3892
2193|PHI:2193|MoRgs2|XP_361183|148305|Magnaporthe oryzae (related: Magnaporthe grisea)|Unaffected pathogenicity, 2432|PHI:2432|FgRgsA|I1RKA4|5518|Gibberella zeae (related: Fusarium graminearum)|Reduced virulence	P1609_3893
1240|PHI:1240|FGSG_05586|I1RWQ0|5518|Gibberella zeae (related: Fusarium graminearum)|Unaffected pathogenicity, 3088 | CPK2 | PHI:3088 | I1RWQ0 | 5518 | Fusarium graminearum | mixed outcome	P1609_2737
1419|PHI:1419|GzC2H086|I1S0X7|5518|Gibberella zeae (related: Fusarium graminearum)|Unaffected pathogenicity	P1609_6381
1296|PHI:1296|GzAPSES004|I1S0Z2|5518|Gibberella zeae (related: Fusarium graminearum)|Reduced virulence, 2988|PHI:2988|MoAPS2|G4NA99|148305|Magnaporthe oryzae|Reduced virulence	P1609_11795
2840|PHI:2840|CnSEC14-1|F6K8L5|5207|Cryptococcus neoformans|Reduced virulence, 2841|PHI:2841|CnSEC14-2|F6K8L6|5207|Cryptococcus neoformans|Unaffected pathogenicity	P1609_9707
1249|PHI:1249|FGSG_00132|I1RB79|5518|Gibberella zeae (related: Fusarium graminearum)|Unaffected pathogenicity	P1609_3168
1504|PHI:1504|GzHMG036|I1S8H2|5518|Gibberella zeae (related: Fusarium graminearum)|Lethal	P1609_8908
1915|PHI:1915|GzZC230|I1RSL0|5518|Gibberella zeae (related: Fusarium graminearum)|Reduced virulence, 3316 | gcc1 | PHI:3316 | G4MZS3 | 318829 | Magnaporthe oryzae | reduced virulence	P1609_1790
1231|PHI:1231|FGSG_10591|Q4I5U9|5518|Gibberella zeae (related: Fusarium graminearum)|Lethal, 1492|PHI:1492|GzHMG024|Q4I5U9|5518|Gibberella zeae (related: Fusarium graminearum)|Unaffected pathogenicity	P1609_7749
774|PHI:774|MGG_09250|EDJ97946|318829|Magnaporthe oryzae|Loss of pathogenicity, 792|PHI:792|MGG_09250|EDJ97946|318829|Magnaporthe oryzae|Reduced virulence	P1609_7568
1943|PHI:1943|GzZC258|I1RY79|5518|Gibberella zeae (related: Fusarium graminearum)|Unaffected pathogenicity	P1609_3373
2563|PHI:2563|DPP3|Q5AH74|5476|Candida albicans|Reduced virulence	P1609_12100
873|PHI:873|MGG_02443|EDJ98595|318829|Magnaporthe oryzae|Reduced virulence	P1609_8915
1026|PHI:1026|bcplc1|AAB39564|40559|Botrytis cinerea|Reduced virulence, 2057|PHI:2057|MoPLC1|0|148305|Magnaporthe oryzae (related: Magnaporthe grisea)|Loss of pathogenicity	P1609_8911
1549|PHI:1549|MYT2|I1RTN5|5518|Gibberella zeae (related: Fusarium graminearum)|Unaffected pathogenicity, 2385|PHI:2385|MYT2|I1RTN5|5518|Gibberella zeae (related: Fusarium graminearum)|Reduced virulence	P1609_6628
2259|PHI:2259|AAR1|G8DNT1|45130|Cochliobolus sativus|Reduced virulence, 3019 | MoLys2 | PHI:3019 | G5EI34 | 318829 | Magnaporthe oryzae | reduced virulence	P1609_11748
1452|PHI:1452|GzHSF003|I1S282|5518|Gibberella zeae (related: Fusarium graminearum)|Unaffected pathogenicity, 2178|PHI:2178|MoSFl1|MGG_06971|148305|Magnaporthe oryzae (related: Magnaporthe grisea)|Reduced virulence	P1609_7705
169|PHI:169|CLTA1|AAG25917|290576|Colletotrichum lindemuthianum|Loss of pathogenicity, 1988|PHI:1988|GzZC303|I1RAP1|5518|Gibberella zeae (related: Fusarium graminearum)|Unaffected pathogenicity	P1609_7339
2401|PHI:2401|CaRING1|G0T3B3|456327|Xanthomonas campestris pv vesicatoria|Mixed outcome	P1609_3206
124|PHI:124|INT1|AAA96019|5476|Candida albicans|Reduced virulence	P1609_8774
358|PHI:358|ILV2|AAR29084|5207|Cryptococcus neoformans|Loss of pathogenicity	P1609_7820
174|PHI:174|GNA1|BAA36496|5476|Candida albicans|Reduced virulence	P1609_2724
451|PHI:451|PMT1|AAC31119|5476|Candida albicans|Loss of pathogenicity	P1609_3098
1959|PHI:1959|GzZC274|I1RM85|5518|Gibberella zeae (related: Fusarium graminearum)|Unaffected pathogenicity	P1609_1351
319|PHI:319|SQL2|AAO19638|5270|Ustilago maydis|Reduced virulence	P1609_8144
1604|PHI:1604|GzOB045|I1S1V9|5518|Gibberella zeae (related: Fusarium graminearum)|Unaffected pathogenicity	P1609_9537
591|PHI:591|ORP1|AAK51698|318829|Magnaporthe oryzae|Loss of pathogenicity	P1609_7812
2154|PHI:2154|RBP35|MGG_02741|148305|Magnaporthe oryzae (related: Magnaporthe grisea)|Reduced virulence	P1609_2836
1658|PHI:1658|GzCCCH002|I1RRW3|5518|Gibberella zeae (related: Fusarium graminearum)|Unaffected pathogenicity	P1609_7421
178|PHI:178|pabaA|AAD31929|5085|Aspergillus fumigatus|Reduced virulence	P1609_5295
2325|PHI:2325|TEP1|I1RM09|5518|Gibberella zeae (related: Fusarium graminearum)|Reduced virulence, 2502|PHI:2502|FgTep1p|I1RM09 |5518|Gibberella zeae (related: Fusarium graminearum)|Reduced virulence	P1609_1551
2305|PHI:2305|BcFKBP12||40559|Botrytis cinerea|Mixed outcome, 548|PHI:548|BcPIC5|ABA25866|40559|Botrytis cinerea|Reduced virulence	P1609_6515
1333|PHI:1333|GzbZIP015|I1RY51|5518|Gibberella zeae (related: Fusarium graminearum)|Unaffected pathogenicity, 467|PHI:467|CPC1|AAC16255|5116|Cryphonectria parasitica|Reduced virulence	P1609_8559
1188|PHI:1188|(Sc Sak1)|I1RDE5|5518|Gibberella zeae (related: Fusarium graminearum)|Reduced virulence, 3176 | MoSak1 | PHI:3176 | G4MNZ0 | 318829 | Magnaporthe oryzae | mixed outcome	P1609_7667
2733|PHI:2733| metE|Q97S31|1313|Streptococcus Pneumoniae|Mixed outcome, 442|PHI:442|MSY1||5518|Fusarium graminearum|Reduced virulence	P1609_7957
1293|PHI:1293|GzAPSES001|I1RK32|5518|Gibberella zeae (related: Fusarium graminearum)|Reduced virulence, 2987|PHI:2987|MoAPS1|G4NID8|148305|Magnaporthe oryzae|Reduced virulence	P1609_4775
3331 | snf7 | PHI:3331 | J9VU41 | 5207 | Cryptococcus neoformans | loss of pathogenicity, 3332 | snf7 | PHI:3332 | A0A095CFR8 | 552467 | Cryptococcus gattii | loss of pathogenicity	P1609_5332
1414|PHI:1414|GzC2H081|I1RZL0|5518|Gibberella zeae (related: Fusarium graminearum)|Unaffected pathogenicity	P1609_3417
2072|PHI:2072|Moatg4|MGG_03580|148305|Magnaporthe oryzae (related: Magnaporthe grisea)|Loss of pathogenicity, 2182|PHI:2182|MoAtg4|B6VCT6|148305|Magnaporthe oryzae (related: Magnaporthe grisea)|Loss of pathogenicity	P1609_3418
1643|PHI:1643|GzWing015|I1RS37|5518|Gibberella zeae (related: Fusarium graminearum)|Reduced virulence	P1609_4153
3277 | gnoA | PHI:3277 | Q4WIQ3 | 746128 | Aspergillus fumigatus | unaffected pathogenicity, 668|PHI:668|GNO1|AAP41027|178876|Cryptococcus neoformans|Reduced virulence	P1609_6538
1251|PHI:1251|FGSG_09150|I1RD19|5518|Gibberella zeae (related: Fusarium graminearum)|Unaffected pathogenicity	P1609_3256
2194|PHI:2194|MoRgs3|XP_360603|148305|Magnaporthe oryzae (related: Magnaporthe grisea)|Reduced virulence, 2433|PHI:2433|FgRgsB|I1RD16|5518|Gibberella zeae (related: Fusarium graminearum)|Reduced virulence	P1609_3259
244|PHI:244|CLAP1|AAN62846|290576|Colletotrichum lindemuthianum|Loss of pathogenicity	P1609_3261
1443|PHI:1443|GzGATA001|I1RB11|5518|Gibberella zeae (related: Fusarium graminearum)|Unaffected pathogenicity, 2985|PHI:2985|MGG_04521.6|G4MSF2|148305|Magnaporthe oryzae|Reduced virulence	P1609_302
1312|PHI:1312|GzbHLH013|I1RVV8|5518|Gibberella zeae (related: Fusarium graminearum)|Unaffected pathogenicity, 3362 | SrbA | PHI:3362 | Q4WIN1 | 746128 | Aspergillus fumigatus | mixed outcome	P1609_8619
479|PHI:479|MEP1|AAQ07436|199306|Coccidioides posadasii|Reduced virulence	P1609_1580
1518|PHI:1518|GzHOMEL016|I1RS54|5518|Gibberella zeae (related: Fusarium graminearum)|Unaffected pathogenicity	P1609_10882
3004|PHI:3004|ClpX|A6QHK8|1280|Staphylococcus aureus|Reduced virulence	P1609_3884
2746|PHI:2746|treZ|Q02LV7|287|Pseudomonas aeruginosa|Mixed outcome	P1609_3883
2116|PHI:2116|CHS7|B5M4A8|148305|Magnaporthe oryzae (related: Magnaporthe grisea)|Reduced virulence, 2301|PHI:2301|CHS7|B5M4A8|148305|Magnaporthe oryzae (related: Magnaporthe grisea)|Reduced virulence	P1609_6485
2548|PHI:2548|KRR1|O42766 |746128|Aspergillus fumigatus|Mixed outcome, 2609|PHI:2609|KRR1|AAB96910.2|746128|Aspergillus fumigatus|Mixed outcome	P1609_6503
1931|PHI:1931|GzZC246|I1REJ4|5518|Gibberella zeae (related: Fusarium graminearum)|Unaffected pathogenicity, 3310 | Mocod1 | PHI:3310 | G4MKH9 | 318829 | Magnaporthe oryzae | mixed outcome	P1609_7296
1655|PHI:1655|GzWing028|I1S9V9|5518|Gibberella zeae (related: Fusarium graminearum)|Unaffected pathogenicity	P1609_5397
2068|PHI:2068|DES1|XP_361689|148305|Magnaporthe oryzae (related: Magnaporthe grisea)|Reduced virulence, 783|PHI:783|MGG_04163|EDJ99464|318829|Magnaporthe oryzae|Reduced virulence	P1609_5401
1714|PHI:1714|GzZC029|I1RQU8|5518|Gibberella zeae (related: Fusarium graminearum)|Lethal, 1808|PHI:1808|GzZC123|I1RF14|5518|Gibberella zeae (related: Fusarium graminearum)|Unaffected pathogenicity	P1609_13007
3061 | MoRga1 | PHI:3061 | G4NF65 | 318829 | Magnaporthe oryzae | mixed outcome	P1609_5427
3161 | Mohik5 | PHI:3161 | G4MKP6 | 318829 | Magnaporthe oryzae | loss of pathogenicity	P1609_6010
1712|PHI:1712|GzZC027|I1RMV9|5518|Gibberella zeae (related: Fusarium graminearum)|Unaffected pathogenicity, 734|PHI:734|FOW2|BAE98264|5507|Fusarium oxysporum|Loss of pathogenicity	P1609_6454
1869|PHI:1869|GzZC184|I1RDY4|5518|Gibberella zeae (related: Fusarium graminearum)|Unaffected pathogenicity	P1609_7611
1169|PHI:1169|HDF2|I1RKC4|5518|Gibberella zeae (related: Fusarium graminearum)|Reduced virulence, 1172|PHI:1172|HDF2|I1RKC4|5518|Gibberella zeae (related: Fusarium graminearum)|Reduced virulence	P1609_9526
1226|PHI:1226|FGSG_11614|I1RP88|5518|Gibberella zeae (related: Fusarium graminearum)|Lethal, 2246|PHI:2246|Aga1|XM_751538.1|5270|Ustilago maydis|Loss of pathogenicity	P1609_3957
2558|PHI:2558|DUR31|Q59P00|5476|Candida albicans|Reduced virulence	P1609_3265
882|PHI:882|MGG_04985|EDJ95433|318829|Magnaporthe oryzae|Reduced virulence	P1609_8793
1347|PHI:1347|GzC2H007|I1RBT2|5518|Gibberella zeae (related: Fusarium graminearum)|Reduced virulence, 864|PHI:864|ZafA|ABJ98717|5085|Aspergillus fumigatus|Loss of pathogenicity	P1609_285
2021|PHI:2021|Pac2|MGG_06564|5270|Ustilago maydis|Reduced virulence, 2400|PHI:2400|Fgp2|I1S215|5518|Gibberella zeae (related: Fusarium graminearum)|Unaffected pathogenicity	P1609_3994
1181|PHI:1181|(Sc Kic1)|I1RNY7|5518|Gibberella zeae (related: Fusarium graminearum)|Reduced virulence	P1609_5772
1273|PHI:1273|FGSG_05549|I1RCM6|5518|Gibberella zeae (related: Fusarium graminearum)|Unaffected pathogenicity	P1609_11015
2292|PHI:2292|aoxA|B0XVF7|746128|Aspergillus fumigatus|Unaffected pathogenicity	P1609_10869
1461|PHI:1461|GzCCAAT001|I1RA31|5518|Gibberella zeae (related: Fusarium graminearum)|Unaffected pathogenicity, 3052 | FvHAP2 | PHI:3052 | W7LWT0 | 117187 | Fusarium verticillioides | reduced virulence	P1609_8322
3039 | MoSPA2 | PHI:3039 | U3MXJ8 | 318829 | Magnaporthe oryzae | mixed outcome	P1609_3282
3257 | MoIlv1 | PHI:3257 | G4MU34 | 318829 | Magnaporthe oryzae | reduced virulence	P1609_1969
1557|PHI:1557|GzNH002|I1RBU9|5518|Gibberella zeae (related: Fusarium graminearum)|Unaffected pathogenicity, 2170|PHI:2170|Conserved hypothetical protein|MGG_09312|148305|Magnaporthe oryzae (related: Magnaporthe grisea)|Reduced virulence	P1609_7495
1455|PHI:1455|GzAra003|I1RKU6|5518|Gibberella zeae (related: Fusarium graminearum)|Unaffected pathogenicity	P1609_3609, P1609_5044, P1609_8181, P1609_960
2928|PHI:2928|lip22|J9NNZ8|59765|Fusarium oxysporum f. sp. Lycopersici|Unaffected pathogenicity	P1609_11579, P1609_5883
1390|PHI:1390|GzC2H053|I1RU53|5518|Gibberella zeae (related: Fusarium graminearum)|Unaffected pathogenicity	P1609_11499
2337|PHI:2337|SUR7|Q5A4M8|5476|Candida albicans|Reduced virulence	P1609_2433
1751|PHI:1751|GzZC066|I1RZ96|5518|Gibberella zeae (related: Fusarium graminearum)|Unaffected pathogenicity, 3315 | conx1 | PHI:3315 | G4MT41 | 318829 | Magnaporthe oryzae | reduced virulence	P1609_1851
875|PHI:875|MGG_04587|EDK05593|318829|Magnaporthe oryzae|Loss of pathogenicity	P1609_337
1232|PHI:1232|FGSG_03499|I1RTC2|5518|Gibberella zeae (related: Fusarium graminearum)|Lethal	P1609_7001
1644|PHI:1644|GzRFX1|I1RTB9|5518|Gibberella zeae (related: Fusarium graminearum)|Unaffected pathogenicity	P1609_5237
3389 | FVEG_12521 | PHI:3389 | W7MS01 | 117187 | Fusarium verticillioides | unaffected pathogenicity	P1609_7804
1620|PHI:1620|GzJUM002|I1RD69|5518|Gibberella zeae (related: Fusarium graminearum)|Unaffected pathogenicity	P1609_7635
281|PHI:281|CDC10|CAA81090|5476|Candida albicans|Reduced virulence	P1609_7944
434|PHI:434|GEL2|EAL88984|5085|Aspergillus fumigatus|Reduced virulence	P1609_7948
2386|PHI:2386|ACL1|I1S7N4|5518|Gibberella zeae (related: Fusarium graminearum)|Loss of pathogenicity	P1609_7952, P1609_7960
338|PHI:338|CLB2|AAP94020|5270|Ustilago maydis|Reduced virulence	P1609_10139
1569|PHI:1569|GzOB009|I1RCH5|5518|Gibberella zeae (related: Fusarium graminearum)|Lethal	P1609_10138
1478|PHI:1478|GzHMG010|I1RCP3|5518|Gibberella zeae (related: Fusarium graminearum)|Unaffected pathogenicity	P1609_10147
2441|PHI:2441|MgAlg2|F9XJV5|1047171|Mycosphaerella graminicola (related: Zymoseptoria triticii)|Loss of pathogenicity	P1609_8975
1665|PHI:1665|GzCCHC005|I1RS06|5518|Gibberella zeae (related: Fusarium graminearum)|Unaffected pathogenicity	P1609_10117
1214|PHI:1214|FGSG_07816|I1RN54|5518|Gibberella zeae (related: Fusarium graminearum)|Reduced virulence	P1609_4182
1268|PHI:1268|FGSG_07816|I1RN43|5518|Gibberella zeae (related: Fusarium graminearum)|Unaffected pathogenicity	P1609_4165
2016|PHI:2016|PTH2|MGG_01099|148305|Magnaporthe oryzae (related: Magnaporthe grisea)|Loss of pathogenicity	P1609_9502
1614|PHI:1614|GzSART1|I1RQD8|5518|Gibberella zeae (related: Fusarium graminearum)|Unaffected pathogenicity	P1609_9507
2970|PHI:2970|argB|Q4WNW5|746128|Aspergillus fumigatus|Unaffected pathogenicity	P1609_9500
2748|PHI:2748|snf1|Q4PF20|5270|Ustilago maydis|Reduced virulence	P1609_9513
270|PHI:270|RHO1|BAA24262|5476|Candida albicans|Loss of pathogenicity	P1609_1914
1267|PHI:1267|FGSG_05586|I1RKK7|5518|Gibberella zeae (related: Fusarium graminearum)|Unaffected pathogenicity	P1609_1412
502|PHI:502|ADE4|CAA89133|4932|Saccharomyces cerevisiae|Reduced virulence	P1609_353
1289|PHI:1289|FGSG_04416|I1RKK5|5518|Gibberella zeae (related: Fusarium graminearum)|Unaffected pathogenicity	P1609_1896
1598|PHI:1598|GzOB038|I1RZ35|5518|Gibberella zeae (related: Fusarium graminearum)|Reduced virulence	P1609_1554
2249|PHI:2249|Mpd1|Q0U6E8|13684|Phaeosphaeria nodorum (related: Stagonospora nodorum)|Unaffected pathogenicity, 2270|PHI:2270|Mpd1|Q0U6E8|13684|Phaeosphaeria nodorum (related: Stagonospora nodorum)|Unaffected pathogenicity	P1609_7371
1254|PHI:1254|FGSG_07742|I1RDX3|5518|Gibberella zeae (related: Fusarium graminearum)|Unaffected pathogenicity	P1609_7909
1487|PHI:1487|GzHMG019|I1RQ92|5518|Gibberella zeae (related: Fusarium graminearum)|Unaffected pathogenicity	P1609_1121
1678|PHI:1678|GzGRF|I1RMC1|5518|Gibberella zeae (related: Fusarium graminearum)|Unaffected pathogenicity	P1609_1107
465|PHI:465|KIN2|AAB63337|5270|Ustilago maydis|Reduced virulence	P1609_1372
1449|PHI:1449|GzGATA007|I1RYV4|5518|Gibberella zeae (related: Fusarium graminearum)|Unaffected pathogenicity	P1609_1469
1582|PHI:1582|GzOB022|I1RQ81|5518|Gibberella zeae (related: Fusarium graminearum)|Unaffected pathogenicity	P1609_6331
339|PHI:339|CLPT1|CAC41973|290576|Colletotrichum lindemuthianum|Reduced virulence	P1609_6323
1666|PHI:1666|GzCCHC006|I1RX47|5518|Gibberella zeae (related: Fusarium graminearum)|Unaffected pathogenicity	P1609_3112
893|PHI:893|MGG_02986|EDK01543|318829|Magnaporthe oryzae|Reduced virulence	P1609_3113
3014 | MoAND1 | PHI:3014 | G5EHD3 | 318829 | Magnaporthe oryzae | reduced virulence	P1609_3091
1215|PHI:1215|FGSG_02838|I1RX56|5518|Gibberella zeae (related: Fusarium graminearum)|Reduced virulence	P1609_3066
1407|PHI:1407|GzC2H071|I1RX64|5518|Gibberella zeae (related: Fusarium graminearum)|Lethal	P1609_2632
1677|PHI:1677|GzDHHC005|Q4I1J3|5518|Gibberella zeae (related: Fusarium graminearum)|Unaffected pathogenicity	P1609_3045
2842|PHI:2842|CnSFH5|F6K8L7|5207|Cryptococcus neoformans|Mixed outcome	P1609_4564
1592|PHI:1592|GzOB032|I1RWS0|5518|Gibberella zeae (related: Fusarium graminearum)|Unaffected pathogenicity	P1609_911
503|PHI:503|COX15|AAB64668|4932|Saccharomyces cerevisiae|Reduced virulence	P1609_8816
1593|PHI:1593|GzOB033|I1RWS6|5518|Gibberella zeae (related: Fusarium graminearum)|Unaffected pathogenicity	P1609_9601
1299|PHI:1299|GzAT003|I1RYN7|5518|Gibberella zeae (related: Fusarium graminearum)|Unaffected pathogenicity	P1609_8853
1354|PHI:1354|GzC2H014|I1RCM9|5518|Gibberella zeae (related: Fusarium graminearum)|Reduced virulence	P1609_8458
2527|PHI:2527|SEC31|Q4X0M4|746128|Aspergillus fumigatus|Mixed outcome	P1609_9494
2351|PHI:2351|AMT1|XP_381310|5518|Gibberella zeae (related: Fusarium graminearum)|Reduced virulence	P1609_333
1668|PHI:1668|GzCCHC008|I1S0C1|5518|Gibberella zeae (related: Fusarium graminearum)|Unaffected pathogenicity	P1609_6351
1201|PHI:1201|(Bud32)|Q4HYC1|5518|Gibberella zeae (related: Fusarium graminearum)|Reduced virulence	P1609_953
2654|PHI:2654|DUR1,2|Q59VF3|5476|Candida albicans|Reduced virulence	P1609_238
1135|PHI:1135|LmIFRD|C6KED4|5022|Leptosphaeria maculans|Loss of pathogenicity	P1609_1763
1247|PHI:1247|FGSG_02488|I1S0G8|5518|Gibberella zeae (related: Fusarium graminearum)|Unaffected pathogenicity	P1609_2038
2396|PHI:2396|GzSYN2|I1RZS5|5518|Gibberella zeae (related: Fusarium graminearum)|Reduced virulence	P1609_9625
1228|PHI:1228|FGSG_07745|I1RR00|5518|Gibberella zeae (related: Fusarium graminearum)|Lethal	P1609_6893
1540|PHI:1540|GzMyb004|I1RCX3|5518|Gibberella zeae (related: Fusarium graminearum)|Unaffected pathogenicity	P1609_5124
1631|PHI:1631|GzWing003|I1RBL8|5518|Gibberella zeae (related: Fusarium graminearum)|Unaffected pathogenicity	P1609_3782
1974|PHI:1974|GzZC289|I1RQN6|5518|Gibberella zeae (related: Fusarium graminearum)|Unaffected pathogenicity	P1609_6302
2167|PHI:2167|EXP5|G4N1A3|148305|Magnaporthe oryzae (related: Magnaporthe grisea)|Reduced virulence	P1609_6304
2694|PHI:2694| rsmB|Q6D000|29471|Pectobacterium atrosepticum|Mixed outcome	P1609_901
3459 | NTPDase1 | PHI:3459 | Q4QFI1 | 5664 | Leishmania major | mixed outcome	P1609_1677
2825|PHI:2825|SET1|Q5ABG1|5476|Candida albicans|Reduced virulence	P1609_1614
2177|PHI:2177|PAS1|MGG_09299|148305|Magnaporthe oryzae (related: Magnaporthe grisea)|Unaffected pathogenicity	P1609_7508
1587|PHI:1587|GzOB027|I1RSI4|5518|Gibberella zeae (related: Fusarium graminearum)|Unaffected pathogenicity	P1609_7507
3066 | MoRga6 | PHI:3066 | G4MQB0 | 318829 | Magnaporthe oryzae | mixed outcome	P1609_7534
2532|PHI:2532|HEM15|Q4WUA3|746128|Aspergillus fumigatus|Lethal	P1609_1142
789|PHI:789|MGG_04116|EDJ99418|318829|Magnaporthe oryzae|Reduced virulence	P1609_5355
1464|PHI:1464|GzCCAAT004|I1RMV4|5518|Gibberella zeae (related: Fusarium graminearum)|Reduced virulence	P1609_6435
1222|PHI:1222|FGSG_00132|I1RMV6|5518|Gibberella zeae (related: Fusarium graminearum)|Lethal	P1609_6440
1792|PHI:1792|GzZC107|I1RVS7|5518|Gibberella zeae (related: Fusarium graminearum)|Unaffected pathogenicity	P1609_6633
862|PHI:862|ClaSSD1|BAE66713|5462|Colletotrichum lagenarium|Loss of pathogenicity	P1609_1622
1227|PHI:1227|FGSG_07742|I1RPV7|5518|Gibberella zeae (related: Fusarium graminearum)|Lethal	P1609_6241
1488|PHI:1488|GzHMG020|I1RSA6|5518|Gibberella zeae (related: Fusarium graminearum)|Unaffected pathogenicity	P1609_5249
1535|PHI:1535|GzMADS002|I1RXD6|5518|Gibberella zeae (related: Fusarium graminearum)|Unaffected pathogenicity	P1609_5245
3067 | MoRga7 | PHI:3067 | G4NGW7 | 318829 | Magnaporthe oryzae | mixed outcome	P1609_5244
1517|PHI:1517|GzHOMEL013|I1RPZ1|5518|Gibberella zeae (related: Fusarium graminearum)|Lethal	P1609_6197
1648|PHI:1648|GzWing020|I1RWP1|5518|Gibberella zeae (related: Fusarium graminearum)|Reduced virulence	P1609_2585
2027|PHI:2027|TGL1-1|G4NJL1|148305|Magnaporthe oryzae (related: Magnaporthe grisea)|Unaffected pathogenicity	P1609_11958
2055|PHI:2055|PPT1|Q1L5B8|31870|Colletotrichum graminicola (related: Glomerella graminicola)|Loss of pathogenicity	P1609_2597
1578|PHI:1578|GzOB018|I1RKY2|5518|Gibberella zeae (related: Fusarium graminearum)|Unaffected pathogenicity	P1609_2692
1589|PHI:1589|GzOB029|I1RWH5|5518|Gibberella zeae (related: Fusarium graminearum)|Unaffected pathogenicity	P1609_2721
1317|PHI:1317|GzBrom002|I1RQE9|5518|Gibberella zeae (related: Fusarium graminearum)|Reduced virulence	P1609_9688
1297|PHI:1297|GzAT001|I1RPU1|5518|Gibberella zeae (related: Fusarium graminearum)|Reduced virulence	P1609_3699
2107|PHI:2107|Zinc-regulated transporter 2|MGG_05905|148305|Magnaporthe oryzae (related: Magnaporthe grisea)|Mixed outcome	P1609_6672
265|PHI:265|MET3|AAL92174|5207|Cryptococcus neoformans|Loss of pathogenicity	P1609_3122
3063 | MoRga3 | PHI:3063 | G4NKL4 | 318829 | Magnaporthe oryzae | mixed outcome	P1609_2595
1429|PHI:1429|GzC2H097|I1S7I6|5518|Gibberella zeae (related: Fusarium graminearum)|Unaffected pathogenicity	P1609_9292
3138 | ELP3 | PHI:3138 | I1REF2 | 5518 | Fusarium graminearum | reduced virulence	P1609_7156
1375|PHI:1375|GzC2H038|I1RPA0|5518|Gibberella zeae (related: Fusarium graminearum)|Unaffected pathogenicity	P1609_6118
2562|PHI:2562|Cwt1|Q59M50|5476|Candida albicans|Reduced virulence	P1609_3763
2550|PHI:2550|NOB1|Q4WES1|746128|Aspergillus fumigatus|Mixed outcome	P1609_7561
2522|PHI:2522|SPE2|Q4WEN8|746128|Aspergillus fumigatus|Lethal	P1609_11337
1625|PHI:1625|GzOpi|I1RXB9|5518|Gibberella zeae (related: Fusarium graminearum)|Unaffected pathogenicity	P1609_11331
3097 | Kre2/Mnt1 | PHI:3097 | J5JEX5 | 176275 | Beauveria bassiana | reduced virulence	P1609_9458
1515|PHI:1515|GzHOMEL009|I1RG67|5518|Gibberella zeae (related: Fusarium graminearum)|Unaffected pathogenicity	P1609_9471
887|PHI:887|MGG_05174|EDJ95219|318829|Magnaporthe oryzae|Reduced virulence	P1609_10818
1491|PHI:1491|GzHMG023|I1RST1|5518|Gibberella zeae (related: Fusarium graminearum)|Lethal	P1609_523
2821|PHI:2821|SNF2|Q5ALP9|5476|Candida albicans|Reduced virulence	P1609_4195
1727|PHI:1727|GzZC042|I1S5Q2|5518|Gibberella zeae (related: Fusarium graminearum)|Unaffected pathogenicity	P1609_7859
1357|PHI:1357|GzC2H017|I1RFY9|5518|Gibberella zeae (related: Fusarium graminearum)|Unaffected pathogenicity	P1609_1645
1574|PHI:1574|GzOB014|I1RFX8|5518|Gibberella zeae (related: Fusarium graminearum)|Lethal	P1609_1653
1650|PHI:1650|GzWing022|I1S006|5518|Gibberella zeae (related: Fusarium graminearum)|Lethal	P1609_6275
1385|PHI:1385|GzC2H048|I1RSF7|5518|Gibberella zeae (related: Fusarium graminearum)|Unaffected pathogenicity	P1609_10581
1768|PHI:1768|GzZC083|I1RAN6|5518|Gibberella zeae (related: Fusarium graminearum)|Unaffected pathogenicity	P1609_10606
1530|PHI:1530|Gzsnd|I1RWP4|5518|Gibberella zeae (related: Fusarium graminearum)|Unaffected pathogenicity	P1609_11954
3283 | ampG | PHI:3283 | Q8P471 | 339 | Xanthomonas campestris | increased virulence	P1609_2857
1953|PHI:1953|GzZC268|I1RKB4|5518|Gibberella zeae (related: Fusarium graminearum)|Unaffected pathogenicity	P1609_3879
1675|PHI:1675|GzDHHC003|Q4I8B6|5518|Gibberella zeae (related: Fusarium graminearum)|Unaffected pathogenicity	P1609_12443
1525|PHI:1525|GzHOMEL035|Q4HY90|5518|Gibberella zeae (related: Fusarium graminearum)|Unaffected pathogenicity	P1609_1630
1552|PHI:1552|GzMyb016|I1S0N5|5518|Gibberella zeae (related: Fusarium graminearum)|Unaffected pathogenicity	P1609_9591
2403|PHI:2403|CSN1|A9QUB2|169388|Fusarium solani|Mixed outcome	P1609_6879
1358|PHI:1358|GzC2H018|I1RG87|5518|Gibberella zeae (related: Fusarium graminearum)|Unaffected pathogenicity	P1609_5784
1252|PHI:1252|FGSG_12132|I1RP15|5518|Gibberella zeae (related: Fusarium graminearum)|Unaffected pathogenicity	P1609_9309
1440|PHI:1440|GzNot002|I1SA65|5518|Gibberella zeae (related: Fusarium graminearum)|Reduced virulence	P1609_1636
1465|PHI:1465|GzCCAAT005|I1RNC6|5518|Gibberella zeae (related: Fusarium graminearum)|Unaffected pathogenicity	P1609_4288
2714|PHI:2714|PEX5|I1RC71|5518|Fusarium graminearum|Reduced virulence	P1609_168
1554|PHI:1554|GzMyb018|I1RC64|5518|Gibberella zeae (related: Fusarium graminearum)|Unaffected pathogenicity	P1609_167
1933|PHI:1933|GzZC248|I1RC73|5518|Gibberella zeae (related: Fusarium graminearum)|Reduced virulence	P1609_154
3325 | PGM | PHI:3325 | B5TQV9 | 1348 | Streptococcus parauberis | reduced virulence	P1609_11079
2085|PHI:2085|Moatg11|MGG_04486|148305|Magnaporthe oryzae (related: Magnaporthe grisea)|Unaffected pathogenicity	P1609_11072
186|PHI:186|RIM8|AAD51715|5476|Candida albicans|Reduced virulence	P1609_1239
1632|PHI:1632|GzWing004|I1RBU0|5518|Gibberella zeae (related: Fusarium graminearum)|Unaffected pathogenicity	P1609_1238
1567|PHI:1567|GzOB007|I1RCB7|5518|Gibberella zeae (related: Fusarium graminearum)|Unaffected pathogenicity	P1609_8463
1257|PHI:1257|FGSG_13509|I1RSK0|5518|Gibberella zeae (related: Fusarium graminearum)|Unaffected pathogenicity	P1609_1220
1629|PHI:1629|GzWing001|I1RAH2|5518|Gibberella zeae (related: Fusarium graminearum)|Unaffected pathogenicity	P1609_7515
1184|PHI:1184|(Sc Gin4-like)|I1RWM5|5518|Gibberella zeae (related: Fusarium graminearum)|Reduced virulence	P1609_2756
1182|PHI:1182|(Sc Mec1)|I1S8Y9|5518|Gibberella zeae (related: Fusarium graminearum)|Reduced virulence	P1609_2935
697|PHI:697|ugt51E1|AAM81358|5022|Leptosphaeria maculans|Unaffected pathogenicity	P1609_9690
1242|PHI:1242|FGSG_02838|I1RWG2|5518|Gibberella zeae (related: Fusarium graminearum)|Unaffected pathogenicity	P1609_4052
1679|PHI:1679|GzMIZ001|I1RW03|5518|Gibberella zeae (related: Fusarium graminearum)|Unaffected pathogenicity	P1609_9561
3078 | ssnA | PHI:3078 | C5VVJ6 | 1307 | Streptococcus suis | reduced virulence	P1609_11863
1379|PHI:1379|GzC2H042|I1RQS8|5518|Gibberella zeae (related: Fusarium graminearum)|Reduced virulence	P1609_8834
1793|PHI:1793|GzZC108|I1RWT7|5518|Gibberella zeae (related: Fusarium graminearum)|Reduced virulence	P1609_892
1543|PHI:1543|GzMyb007|I1RFQ3|5518|Gibberella zeae (related: Fusarium graminearum)|Unaffected pathogenicity	P1609_10761
2060|PHI:2060|MgLig4|B6ZH51|148305|Magnaporthe oryzae (related: Magnaporthe grisea)|Unaffected pathogenicity	P1609_10729
1550|PHI:1550|GzMyb014|I1RWN5|5518|Gibberella zeae (related: Fusarium graminearum)|Unaffected pathogenicity	P1609_2831
2616|PHI:2616|InlA|Q2L8G9|1639|Listeria monocytogenes|Unaffected pathogenicity	P1609_3340
2293|PHI:2293|cycA|B0XTA5|746128|Aspergillus fumigatus|Reduced virulence	P1609_5970
1368|PHI:1368|GzC2H029|I1RK97|5518|Gibberella zeae (related: Fusarium graminearum)|Unaffected pathogenicity	P1609_3905
1471|PHI:1471|GzHMG003|I1RAY3|5518|Gibberella zeae (related: Fusarium graminearum)|Unaffected pathogenicity	P1609_3291
1218|PHI:1218|FGSG_01559|I1RAY2|5518|Gibberella zeae (related: Fusarium graminearum)|Lethal	P1609_3290
1563|PHI:1563|GzOB003|I1RAX7|5518|Gibberella zeae (related: Fusarium graminearum)|Unaffected pathogenicity	P1609_3306
2086|PHI:2086|Moatg24|MGG_03638|148305|Magnaporthe oryzae (related: Magnaporthe grisea)|Unaffected pathogenicity	P1609_3349
2474|PHI:2474|imd1|E3P6S0|5207|Cryptococcus neoformans|Reduced virulence	P1609_3286
350|PHI:350|EMP1|AAR06609|318829|Magnaporthe oryzae|Reduced virulence	P1609_8480
822|PHI:822|Ip|AAB97419|54734|Mycosphaerella graminicola|Chemistry target	P1609_8105
2960|PHI:2960|frdA|C5BDL7|67780|Edwardsiella ictaluri|Reduced virulence	P1609_8106
1343|PHI:1343|GzC2H003|I1RAF0|5518|Gibberella zeae (related: Fusarium graminearum)|Reduced virulence	P1609_847
1316|PHI:1316|GzBrom001|I1RBZ7|5518|Gibberella zeae (related: Fusarium graminearum)|Unaffected pathogenicity	P1609_868
1519|PHI:1519|GzHOMEL018|I1RSV8|5518|Gibberella zeae (related: Fusarium graminearum)|Unaffected pathogenicity	P1609_10048
1380|PHI:1380|GzC2H043|I1RRG4|5518|Gibberella zeae (related: Fusarium graminearum)|Unaffected pathogenicity	P1609_10652
1633|PHI:1633|GzWing005|I1RC15|5518|Gibberella zeae (related: Fusarium graminearum)|Unaffected pathogenicity	P1609_436
1352|PHI:1352|GzC2H012|I1RCK1|5518|Gibberella zeae (related: Fusarium graminearum)|Unaffected pathogenicity	P1609_4225
1467|PHI:1467|GzCCAAT007|I1RXZ0|5518|Gibberella zeae (related: Fusarium graminearum)|Unaffected pathogenicity	P1609_2743
1302|PHI:1302|GzbHLH003|I1RC37|5518|Gibberella zeae (related: Fusarium graminearum)|Unaffected pathogenicity	P1609_8131
2195|PHI:2195|MoRgs4|XP_368254|148305|Magnaporthe oryzae (related: Magnaporthe grisea)|Mixed outcome	P1609_9615
1298|PHI:1298|GzAT002|I1RYF7|5518|Gibberella zeae (related: Fusarium graminearum)|Unaffected pathogenicity	P1609_9809
1313|PHI:1313|GzbHLH014|I1RY71|5518|Gibberella zeae (related: Fusarium graminearum)|Unaffected pathogenicity	P1609_8545
2181|PHI:2181|MoDUO1|XP_365782|148305|Magnaporthe oryzae (related: Magnaporthe grisea)|Reduced virulence	P1609_8864
1246|PHI:1246|FGSG_05549|I1RYQ5|5518|Gibberella zeae (related: Fusarium graminearum)|Unaffected pathogenicity	P1609_8858
2961|PHI:2961|gcvP|C5BAT0|67780|Edwardsiella ictaluri|Reduced virulence	P1609_2547
2244|PHI:2244|37865|gi|46099354|5270|Ustilago maydis|Unaffected pathogenicity	P1609_2552
1918|PHI:1918|GzZC233|I1RT69|5518|Gibberella zeae (related: Fusarium graminearum)|Unaffected pathogenicity	P1609_1720
2097|PHI:2097|Neo1|MGG_04066|148305|Magnaporthe oryzae (related: Magnaporthe grisea)|Loss of pathogenicity	P1609_5303
2525|PHI:2525|TOM40|Q4WDL0|746128|Aspergillus fumigatus|Lethal	P1609_11290
1274|PHI:1274|FGSG_02488|I1RME6|5518|Gibberella zeae (related: Fusarium graminearum)|Unaffected pathogenicity	P1609_11296
1457|PHI:1457|GzAra005|I1RRR9|5518|Gibberella zeae (related: Fusarium graminearum)|Unaffected pathogenicity	P1609_12054
1287|PHI:1287|FGSG_13944|I1RT82|5518|Gibberella zeae (related: Fusarium graminearum)|Unaffected pathogenicity	P1609_7017
1401|PHI:1401|GzC2H064|I1RVY6|5518|Gibberella zeae (related: Fusarium graminearum)|Unaffected pathogenicity	P1609_8591
2544|PHI:2544|PAB1|Q4WK03|746128|Aspergillus fumigatus|Mixed outcome	P1609_6222
1500|PHI:1500|GzHMG032|I1S2F2|5518|Gibberella zeae (related: Fusarium graminearum)|Unaffected pathogenicity	P1609_3630
2553|PHI:2553|VPS4|Q5AG40|5476|Candida albicans|Loss of pathogenicity	P1609_9855
1689|PHI:1689|GzZC004|I1S018|5518|Gibberella zeae (related: Fusarium graminearum)|Unaffected pathogenicity	P1609_2008
2179|PHI:2179|Moplaa|F8SM03|148305|Magnaporthe oryzae (related: Magnaporthe grisea)|Reduced virulence	P1609_11448
1963|PHI:1963|GzZC278|I1RR01|5518|Gibberella zeae (related: Fusarium graminearum)|Unaffected pathogenicity	P1609_6909
1344|PHI:1344|GzC2H004|I1RAQ0|5518|Gibberella zeae (related: Fusarium graminearum)|Unaffected pathogenicity	P1609_1269
1752|PHI:1752|GzZC067|I1RZR8|5518|Gibberella zeae (related: Fusarium graminearum)|Unaffected pathogenicity	P1609_5347
373|PHI:373|PLD1|EAK93902|5476|Candida albicans|Reduced virulence	P1609_9635
1548|PHI:1548|GzMyb012|I1RTE5|5518|Gibberella zeae (related: Fusarium graminearum)|Unaffected pathogenicity	P1609_1669
1798|PHI:1798|GzZC113|I1RSP9|5518|Gibberella zeae (related: Fusarium graminearum)|Unaffected pathogenicity	P1609_1702
1816|PHI:1816|GzZC131|I1RRS3|5518|Gibberella zeae (related: Fusarium graminearum)|Unaffected pathogenicity	P1609_7034
2537|PHI:2537|TRR1|Q4WQJ0|746128|Aspergillus fumigatus|Mixed outcome	P1609_891
267|PHI:267|MLT1|AAD51594|5476|Candida albicans|Reduced virulence	P1609_1290
66|PHI:66|CPP1|AAC05307|5476|Candida albicans|Reduced virulence	P1609_10768
885|PHI:885|MGG_02240|EDJ98842|318829|Magnaporthe oryzae|Reduced virulence	P1609_9038
1384|PHI:1384|GzC2H047|I1RSD5|5518|Gibberella zeae (related: Fusarium graminearum)|Reduced virulence	P1609_406
2568|PHI:2568|CAP2|Q5AMP9|5476|Candida albicans|Reduced virulence	P1609_7469
3017 | Mpr1 | PHI:3017 | J9VXZ9 | 5207 | Cryptococcus neoformans | reduced virulence	P1609_6643
1406|PHI:1406|GzC2H070|I1RX04|5518|Gibberella zeae (related: Fusarium graminearum)|Lethal	P1609_2582
1300|PHI:1300|GzbHLH001|I1RAL4|5518|Gibberella zeae (related: Fusarium graminearum)|Unaffected pathogenicity	P1609_208
2028|PHI:2028|TGL1-2|G4NBI7|148305|Magnaporthe oryzae (related: Magnaporthe grisea)|Unaffected pathogenicity	P1609_8482
2925|PHI:2925|lip2|J9MBA2|59765|Fusarium oxysporum f. sp. Lycopersici|Unaffected pathogenicity	P1609_11106
1220|PHI:1220|FGSG_02488|I1RCF7|5518|Gibberella zeae (related: Fusarium graminearum)|Lethal	P1609_7406
816|PHI:816|MGG_04582|EDJ95999|318829|Magnaporthe oryzae|Reduced virulence	P1609_11125
1243|PHI:1243|FGSG_06420|I1RBW7|5518|Gibberella zeae (related: Fusarium graminearum)|Unaffected pathogenicity	P1609_11059
2078|PHI:2078|Moatg10|MGG_14737|148305|Magnaporthe oryzae (related: Magnaporthe grisea)|Loss of pathogenicity	P1609_202
2185|PHI:2185|PIC1|EHA54868|148305|Magnaporthe oryzae (related: Magnaporthe grisea)|Unaffected pathogenicity	P1609_1301
1649|PHI:1649|GzWing021|I1RZ94|5518|Gibberella zeae (related: Fusarium graminearum)|Unaffected pathogenicity	P1609_1856
2655|PHI:2655|lon|K1C7N5|287|Pseudomonas aeruginosa|Reduced virulence	P1609_1855
1475|PHI:1475|GzHMG007|I1RBB7|5518|Gibberella zeae (related: Fusarium graminearum)|Unaffected pathogenicity	P1609_3777
1501|PHI:1501|GzHMG033|I1S4R6|5518|Gibberella zeae (related: Fusarium graminearum)|Unaffected pathogenicity	P1609_7715
512|PHI:512|CaNAG6|BAB43823|5476|Candida albicans|Reduced virulence	P1609_7695
600|PHI:600|CBP1|AAF63734|5207|Cryptococcus neoformans|Reduced virulence	P1609_3809
2531|PHI:2531|PRI1|Q4WXC5|746128|Aspergillus fumigatus|Lethal	P1609_9736
2257|PHI:2257|Pbl1|Q0UHM8|13684|Phaeosphaeria nodorum (related: Stagonospora nodorum)|Unaffected pathogenicity	P1609_1526
2521|PHI:2521|GUS1|Q4WEM7|746128|Aspergillus fumigatus|Lethal	P1609_6598
1605|PHI:1605|GzOB046|I1S216|5518|Gibberella zeae (related: Fusarium graminearum)|Unaffected pathogenicity	P1609_3989
1319|PHI:1319|GzbZIP001|I1RAI5|5518|Gibberella zeae (related: Fusarium graminearum)|Reduced virulence	P1609_433
440|PHI:440|PMR1|CAB87245|5476|Candida albicans|Reduced virulence	P1609_7479
1562|PHI:1562|GzOB002|I1RAH4|5518|Gibberella zeae (related: Fusarium graminearum)|Lethal	P1609_7513
3236 | Aph1 | PHI:3236 | J9VHR6 | 5207 | Cryptococcus neoformans | mixed outcome	P1609_8502
1360|PHI:1360|GzC2H020|I1RGE3|5518|Gibberella zeae (related: Fusarium graminearum)|Unaffected pathogenicity	P1609_11440
1529|PHI:1529|Gzscp|I1RS41|5518|Gibberella zeae (related: Fusarium graminearum)|Reduced virulence	P1609_4117
505|PHI:505|MIP1|AAA17543|4932|Saccharomyces cerevisiae|Reduced virulence	P1609_648
1224|PHI:1224|FGSG_09150|Q4IB89|5518|Gibberella zeae (related: Fusarium graminearum)|Lethal	P1609_645
2080|PHI:2080|Moatg13|MGG_00454|148305|Magnaporthe oryzae (related: Magnaporthe grisea)|Reduced virulence	P1609_8400
3628 | Rv3213c | PHI:3628 | O05853 | 1773 | Mycobacterium tuberculosis | increased virulence	P1609_354
1790|PHI:1790|GzZC105|I1RVT7|5518|Gibberella zeae (related: Fusarium graminearum)|Lethal	P1609_8278
1630|PHI:1630|GzWing002|I1RB71|5518|Gibberella zeae (related: Fusarium graminearum)|Unaffected pathogenicity	P1609_93
2058|PHI:2058|LHS1|MGG_06648.5|148305|Magnaporthe oryzae (related: Magnaporthe grisea)|Reduced virulence	P1609_6006
2938|PHI:2938|gumH|Q87BQ7|183190|Xylella fastidiosa|Loss of pathogenicity	P1609_5169
2105|PHI:2105|Calcium permease |MGG_01381|148305|Magnaporthe oryzae (related: Magnaporthe grisea)|Mixed outcome	P1609_996
143|PHI:143|CHT|AAA33353|5563|Gloeocercospora sorghi|Unaffected pathogenicity	P1609_4814
1057|PHI:1057|MTP1|ABP98949|318829|Magnaporthe oryzae|Unaffected pathogenicity	P1609_7301
1350|PHI:1350|GzC2H010|I1RCI2|5518|Gibberella zeae (related: Fusarium graminearum)|Unaffected pathogenicity	P1609_10060
280|PHI:280|CCN1|AAG36938|5207|Cryptococcus neoformans|Reduced virulence	P1609_10062
1351|PHI:1351|GzC2H011|I1RCJ3|5518|Gibberella zeae (related: Fusarium graminearum)|Unaffected pathogenicity	P1609_10072
803|PHI:803|MGG_04629|EDJ95969|318829|Magnaporthe oryzae|Reduced virulence	P1609_11137
1667|PHI:1667|GzCCHC007|I1RZP2|5518|Gibberella zeae (related: Fusarium graminearum)|Unaffected pathogenicity	P1609_6254
1595|PHI:1595|GzOB035|I1RX22|5518|Gibberella zeae (related: Fusarium graminearum)|Unaffected pathogenicity	P1609_633
1588|PHI:1588|GzOB028|I1RSY2|5518|Gibberella zeae (related: Fusarium graminearum)|Lethal	P1609_4125
292|PHI:292|CPRa|AAK31936|5207|Cryptococcus neoformans|Reduced virulence	P1609_4126
3035 | FgERG3A | PHI:3035 | I1RFM2 | 5518 | Fusarium graminearum | reduced virulence	P1609_559
259|PHI:259|GPI7|AAL83897|5476|Candida albicans|Reduced virulence	P1609_567
2552|PHI:2552|NOP4|Q4WNM3|746128|Aspergillus fumigatus|Mixed outcome	P1609_568
2518|PHI:2518|MET16|Q4WWN9|746128|Aspergillus fumigatus|Lethal	P1609_3327
1622|PHI:1622|GzJUM004|I1RRU8|5518|Gibberella zeae (related: Fusarium graminearum)|Unaffected pathogenicity	P1609_11036
1248|PHI:1248|FGSG_03146|I1RRU2|5518|Gibberella zeae (related: Fusarium graminearum)|Unaffected pathogenicity	P1609_11045
1472|PHI:1472|GzHMG004|I1RAZ9|5518|Gibberella zeae (related: Fusarium graminearum)|Unaffected pathogenicity	P1609_756
2823|PHI:2823|PES1|Q59X38|5476|Candida albicans|Reduced virulence	P1609_768
1473|PHI:1473|GzHMG005|I1RB25|5518|Gibberella zeae (related: Fusarium graminearum)|Reduced virulence	P1609_934
1301|PHI:1301|GzbHLH002|I1RB45|5518|Gibberella zeae (related: Fusarium graminearum)|Unaffected pathogenicity	P1609_930
1356|PHI:1356|GzC2H016|I1RE06|5518|Gibberella zeae (related: Fusarium graminearum)|Unaffected pathogenicity	P1609_7619
346|PHI:346|CRU1|AAN10186|5270|Ustilago maydis|Reduced virulence	P1609_7793
1541|PHI:1541|GzFlbD|I1RE42|5518|Gibberella zeae (related: Fusarium graminearum)|Unaffected pathogenicity	P1609_7785
1408|PHI:1408|GzC2H072|I1RXE9|5518|Gibberella zeae (related: Fusarium graminearum)|Unaffected pathogenicity	P1609_6152
1398|PHI:1398|GzC2H061|I1RV65|5518|Gibberella zeae (related: Fusarium graminearum)|Unaffected pathogenicity	P1609_8009
1812|PHI:1812|GzZC127|I1RV71|5518|Gibberella zeae (related: Fusarium graminearum)|Unaffected pathogenicity	P1609_4278
1234|PHI:1234|FGSG_07812|I1RV69|5518|Gibberella zeae (related: Fusarium graminearum)|Lethal	P1609_10185
598|PHI:598|THIOL|ABB55459|5022|Leptosphaeria maculans|Reduced virulence	P1609_4623
1411|PHI:1411|GzC2H078|I1RZ11|5518|Gibberella zeae (related: Fusarium graminearum)|Lethal	P1609_143
2062|PHI:2062|Gph1|XP_363893|148305|Magnaporthe oryzae (related: Magnaporthe grisea)|Mixed outcome	P1609_1446
2549|PHI:2549|MAK5|Q4WMS3|746128|Aspergillus fumigatus|Mixed outcome	P1609_8520
1410|PHI:1410|GzC2H076|I1RYG0|5518|Gibberella zeae (related: Fusarium graminearum)|Unaffected pathogenicity	P1609_3007
1236|PHI:1236|FGSG_04770|I1RYF8|5518|Gibberella zeae (related: Fusarium graminearum)|Lethal	P1609_3004
1402|PHI:1402|GzC2H065|I1RWB8|5518|Gibberella zeae (related: Fusarium graminearum)|Unaffected pathogenicity	P1609_3015
1627|PHI:1627|GzTF2S002|I1RW90|5518|Gibberella zeae (related: Fusarium graminearum)|Unaffected pathogenicity	P1609_2569
1061|PHI:1061|MgRho3|ABK60346|318829|Magnaporthe oryzae|Loss of pathogenicity	P1609_2434
1601|PHI:1601|GzOB042|Q4HYQ4|5518|Gibberella zeae (related: Fusarium graminearum)|Unaffected pathogenicity	P1609_9818
1436|PHI:1436|GzC2H105|I1SA30|5518|Gibberella zeae (related: Fusarium graminearum)|Reduced virulence	P1609_2098
1416|PHI:1416|GzC2H083|I1S0D8|5518|Gibberella zeae (related: Fusarium graminearum)|Unaffected pathogenicity	P1609_2071
1185|PHI:1185|(Sc Swe1)|I1S0J9|5518|Gibberella zeae (related: Fusarium graminearum)|Reduced virulence	P1609_1442
1603|PHI:1603|GzOB044|I1S0A1|5518|Gibberella zeae (related: Fusarium graminearum)|Unaffected pathogenicity	P1609_8656
1533|PHI:1533|GzLam002|I1S0F5|5518|Gibberella zeae (related: Fusarium graminearum)|Reduced virulence	P1609_1739
1902|PHI:1902|GzZC217|I1RJS7|5518|Gibberella zeae (related: Fusarium graminearum)|Unaffected pathogenicity	P1609_10784
1162|PHI:1162|BDM1|I1RJS3|5518|Gibberella zeae (related: Fusarium graminearum)|Mixed outcome	P1609_10789
1566|PHI:1566|GzOB006|I1RC95|5518|Gibberella zeae (related: Fusarium graminearum)|Lethal	P1609_8291
2513|PHI:2513|GFA1|E9R5E2|746128|Aspergillus fumigatus|Mixed outcome	P1609_8292
1476|PHI:1476|GzHMG008|I1RC98|5518|Gibberella zeae (related: Fusarium graminearum)|Unaffected pathogenicity	P1609_227
1772|PHI:1772|GzZC087|I1S053|5518|Gibberella zeae (related: Fusarium graminearum)|Reduced virulence	P1609_1628
1802|PHI:1802|GzZC117|I1RVB2|5518|Gibberella zeae (related: Fusarium graminearum)|Unaffected pathogenicity	P1609_2418
1441|PHI:1441|GzDDT|I1RFP4|5518|Gibberella zeae (related: Fusarium graminearum)|Reduced virulence	P1609_10098
1807|PHI:1807|GzZC122|I1RUM5|5518|Gibberella zeae (related: Fusarium graminearum)|Lethal	P1609_3587
1233|PHI:1233|FGSG_13944|I1RUG2|5518|Gibberella zeae (related: Fusarium graminearum)|Lethal	P1609_3520
2114|PHI:2114|Calnexin|MGG_01607|148305|Magnaporthe oryzae (related: Magnaporthe grisea)|Loss of pathogenicity	P1609_1231
1787|PHI:1787|GzZC102|I1S1P9|5518|Gibberella zeae (related: Fusarium graminearum)|Unaffected pathogenicity	P1609_6952
2964|PHI:2964|AsnB|G7TM01|129394|Xanthomonas oryzae pv. Oryzicola|Reduced virulence	P1609_9644
283|PHI:283|CDC24|AAO25556|5476|Candida albicans|Loss of pathogenicity	P1609_4692
491|PHI:491|YVH1|EAK96144|5476|Candida albicans|Reduced virulence	P1609_4689
1422|PHI:1422|GzC2H090|I1S1B7|5518|Gibberella zeae (related: Fusarium graminearum)|Reduced virulence	P1609_4688
1256|PHI:1256|FGSG_02153|I1RAA6|5518|Gibberella zeae (related: Fusarium graminearum)|Unaffected pathogenicity	P1609_490
1618|PHI:1618|GzFET5|Q4IQT8|5518|Gibberella zeae (related: Fusarium graminearum)|Unaffected pathogenicity	P1609_8345
1486|PHI:1486|GzHMG018|I1RNM1|5518|Gibberella zeae (related: Fusarium graminearum)|Unaffected pathogenicity	P1609_181
1219|PHI:1219|FGSG_05549|I1RC35|5518|Gibberella zeae (related: Fusarium graminearum)|Lethal	P1609_183
1682|PHI:1682|GzNF002|I1RSF8|5518|Gibberella zeae (related: Fusarium graminearum)|Unaffected pathogenicity	P1609_8071
1334|PHI:1334|GzbZIP016|I1RZI7|5518|Gibberella zeae (related: Fusarium graminearum)|Reduced virulence	P1609_6319
2201|PHI:2201|PdeL|D0ERY8|148305|Magnaporthe oryzae (related: Magnaporthe grisea)|Mixed outcome	P1609_10631
1229|PHI:1229|FGSG_02153|I1RRB9|5518|Gibberella zeae (related: Fusarium graminearum)|Lethal	P1609_10663
3786 | PA0005 | PHI:3786 | Q9I7C1 | 287 | Pseudomonas aeruginosa | mixed outcome	P1609_10640
1901|PHI:1901|GzZC216|I1RK07|5518|Gibberella zeae (related: Fusarium graminearum)|Unaffected pathogenicity	P1609_1517
2037|PHI:2037|MoRic8|XP_001405357|148305|Magnaporthe oryzae (related: Magnaporthe grisea)|Loss of pathogenicity	P1609_3237
1673|PHI:1673|GzDHHC001|Q4IMZ7|5518|Gibberella zeae (related: Fusarium graminearum)|Unaffected pathogenicity	P1609_8670
1785|PHI:1785|GzZC100|I1S231|5518|Gibberella zeae (related: Fusarium graminearum)|Unaffected pathogenicity	P1609_5574
883|PHI:883|MGG_08560|EDJ97072|318829|Magnaporthe oryzae|Reduced virulence	P1609_3190
1537|PHI:1537|MYT1|I1RA01|5518|Gibberella zeae (related: Fusarium graminearum)|Unaffected pathogenicity	P1609_3202
184|PHI:184|RBT4|AAG09789|5476|Candida albicans|Reduced virulence	P1609_10533
1427|PHI:1427|GzC2H095|I1S4N1|5518|Gibberella zeae (related: Fusarium graminearum)|Unaffected pathogenicity	P1609_801
2255|PHI:2255|Abd1|Q0U2A0|13684|Phaeosphaeria nodorum (related: Stagonospora nodorum)|Unaffected pathogenicity	P1609_827
1547|PHI:1547|GzMyb011|I1RRN6|5518|Gibberella zeae (related: Fusarium graminearum)|Unaffected pathogenicity	P1609_8072
1526|PHI:1526|GzHOMEL036|I1S0J3|5518|Gibberella zeae (related: Fusarium graminearum)|Unaffected pathogenicity	P1609_7729
1369|PHI:1369|GzC2H031|I1RLS1|5518|Gibberella zeae (related: Fusarium graminearum)|Unaffected pathogenicity	P1609_1561
1957|PHI:1957|GzZC272|I1RLS0|5518|Gibberella zeae (related: Fusarium graminearum)|Unaffected pathogenicity	P1609_5470
445|PHI:445|NOS1||5518|Fusarium graminearum|Reduced virulence	P1609_7524
1590|PHI:1590|GzOB030|I1RWI5|5518|Gibberella zeae (related: Fusarium graminearum)|Lethal	P1609_6056
1255|PHI:1255|FGSG_07745|I1RQ67|5518|Gibberella zeae (related: Fusarium graminearum)|Unaffected pathogenicity	P1609_6475
2625|PHI:2625|purA|P65882|90371|Salmonella enterica serovar Typhimurium|Reduced virulence	P1609_11833
1823|PHI:1823|GzZC138|I1RXK4|5518|Gibberella zeae (related: Fusarium graminearum)|Unaffected pathogenicity	P1609_11548, P1609_5843
1327|PHI:1327|GzbZIP009|I1RQS2|5518|Gibberella zeae (related: Fusarium graminearum)|Unaffected pathogenicity	P1609_9848
2972|PHI:2972|Efg1p|G1UB67|5476|Candida albicans|Increased virulence (Hypervirulence)	P1609_9847
2954|PHI:2954|TgNST1|B6KLD2|5811|Toxoplasma gondii|Reduced virulence	P1609_6684
1221|PHI:1221|FGSG_03146|I1RJM9|5518|Gibberella zeae (related: Fusarium graminearum)|Lethal	P1609_10919
2624|PHI:2624|aroA|P07637|90371|Salmonella enterica serovar Typhimurium|Reduced virulence	P1609_9473
1367|PHI:1367|GzC2H028|I1RK94|5518|Gibberella zeae (related: Fusarium graminearum)|Unaffected pathogenicity	P1609_9474
1325|PHI:1325|GzbZIP007|I1RMI1|5518|Gibberella zeae (related: Fusarium graminearum)|Reduced virulence	P1609_7674
2084|PHI:2084|Moatg18|MGG_03139|148305|Magnaporthe oryzae (related: Magnaporthe grisea)|Reduced virulence	P1609_3899
2539|PHI:2539|CDS1|Q4WJ71|746128|Aspergillus fumigatus|Mixed outcome	P1609_4907
2100|PHI:2100|Spf1|MGG_12005|148305|Magnaporthe oryzae (related: Magnaporthe grisea)|Mixed outcome	P1609_4899
220|PHI:220|MAN1|AAG10203|5207|Cryptococcus neoformans|Reduced virulence	P1609_11850
1187|PHI:1187|(Sc Dbf2/Dbf20)|I1RWG6|5518|Gibberella zeae (related: Fusarium graminearum)|Reduced virulence	P1609_2821
62|PHI:62|caRSR1|AAB81286|5476|Candida albicans|Reduced virulence	P1609_2850
1338|PHI:1338|GzbZIP020|I1S8Y4|5518|Gibberella zeae (related: Fusarium graminearum)|Unaffected pathogenicity	P1609_3131
1573|PHI:1573|GzOB013|I1RFJ2|5518|Gibberella zeae (related: Fusarium graminearum)|Lethal	P1609_5369
1637|PHI:1637|GzWing009|Q4IEV4|5518|Gibberella zeae (related: Fusarium graminearum)|Lethal	P1609_5372
1684|PHI:1684|GzRad002|I1RK66|5518|Gibberella zeae (related: Fusarium graminearum)|Unaffected pathogenicity	P1609_5414
806|PHI:806|MGG_04137|EDJ99440|318829|Magnaporthe oryzae|Reduced virulence	P1609_5376
367|PHI:367|MRB1|AAT81148|5270|Ustilago maydis|Reduced virulence	P1609_9779
3147 | rfaE | PHI:3147 | B8F4X8 | 738 | Haemophilus parasuis | reduced virulence	P1609_9666
2700|PHI:2700|lac2|J7MF98|5465|Colletotrichum orbiculare|Reduced virulence	P1609_11926
2899|PHI:2901|BEC1040|CCU82707|62688|Blumeria graminis f. sp. hordei|Effector (plant avirulence determinant)	P1609_10752
1006|PHI:1006|HMR1|Not Available|5518|Fusarium graminearum|Reduced virulence	P1609_718
819|PHI:819|MGG_07061|EDK03750|318829|Magnaporthe oryzae|Reduced virulence	P1609_1788
3174 | MoSip2 | PHI:3174 | G4MNE3 | 318829 | Magnaporthe oryzae | loss of pathogenicity	P1609_7747
1579|PHI:1579|GzOB019|I1RM25|5518|Gibberella zeae (related: Fusarium graminearum)|Unaffected pathogenicity	P1609_10254
1640|PHI:1640|GzWing012|I1RPI0|5518|Gibberella zeae (related: Fusarium graminearum)|Unaffected pathogenicity	P1609_7379
801|PHI:801|MGG_04621|EDJ95977|318829|Magnaporthe oryzae|Reduced virulence	P1609_11146
2117|PHI:2117|SPM1|P58371|148305|Magnaporthe oryzae (related: Magnaporthe grisea)|Reduced virulence	P1609_3317
1223|PHI:1223|FGSG_12887|I1RN31|5518|Gibberella zeae (related: Fusarium graminearum)|Lethal	P1609_380
1638|PHI:1638|GzWing010|I1RN27|5518|Gibberella zeae (related: Fusarium graminearum)|Unaffected pathogenicity	P1609_4331
1617|PHI:1617|GzssDB002|I1S0G0|5518|Gibberella zeae (related: Fusarium graminearum)|Unaffected pathogenicity	P1609_8756
2528|PHI:2528|SLY1|Q4WYU7|746128|Aspergillus fumigatus|Lethal	P1609_6272
1937|PHI:1937|GzZC252|I1RN12|5518|Gibberella zeae (related: Fusarium graminearum)|Unaffected pathogenicity	P1609_5460
1372|PHI:1372|GzC2H035|I1RN03|5518|Gibberella zeae (related: Fusarium graminearum)|Unaffected pathogenicity	P1609_12095
807|PHI:807|MGG_06951|EDJ98115|318829|Magnaporthe oryzae|Reduced virulence	P1609_7724
890|PHI:890|MGG_07015|EDJ98043|318829|Magnaporthe oryzae|Reduced virulence	P1609_7654
1674|PHI:1674|GzDHHC002|Q4IA62|5518|Gibberella zeae (related: Fusarium graminearum)|Unaffected pathogenicity	P1609_8923
2030|PHI:2030|TGL3-1|G4N492|148305|Magnaporthe oryzae (related: Magnaporthe grisea)|Unaffected pathogenicity	P1609_6637
3243 | lsfA | PHI:3243 | Q02QT9 | 287 | Pseudomonas aeruginosa | reduced virulence	P1609_12012
2735|PHI:2735|RsmA|D0KML5|55208|Pectobacterium wasabiae|Increased virulence (hypervirulence)	P1609_8201
1987|PHI:1987|GzZC302|I1RAP2|5518|Gibberella zeae (related: Fusarium graminearum)|Reduced virulence	P1609_7340
3005|PHI:3005|ClpP|P63786|1280|Staphylococcus aureus|Reduced virulence	P1609_7913
1345|PHI:1345|GzC2H005|I1RAW2|5518|Gibberella zeae (related: Fusarium graminearum)|Unaffected pathogenicity	P1609_7682
3348 | nfu | PHI:3348 | Q2FID9 | 1280 | Staphylococcus aureus | reduced virulence	P1609_7681
1572|PHI:1572|GzOB012|I1RE94|5518|Gibberella zeae (related: Fusarium graminearum)|Unaffected pathogenicity	P1609_11200
1602|PHI:1602|GzOB043|I1RZY1|5518|Gibberella zeae (related: Fusarium graminearum)|Unaffected pathogenicity	P1609_2075
1624|PHI:1624|GzJUM006|I1SAP7|5518|Gibberella zeae (related: Fusarium graminearum)|Unaffected pathogenicity	P1609_9535
335|PHI:335|CGRA|AAG28884|5085|Aspergillus fumigatus|Reduced virulence	P1609_8118
177|PHI:177|ODC|CAB56523|13684|Stagonospora nodorum|Reduced virulence	P1609_8917
361|PHI:361|KRE5|EAL01265|5476|Candida albicans|Reduced virulence	P1609_3495
3455 | Apt1 | PHI:3455 | J9VIH5 | 5207 | Cryptococcus neoformans | reduced virulence	P1609_12022
262|PHI:262|MAD2|EAK94586|5476|Candida albicans|Reduced virulence	P1609_12020
1363|PHI:1363|TRI15|I1RJ74|5518|Gibberella zeae (related: Fusarium graminearum)|Unaffected pathogenicity	P1609_4721
1960|PHI:1960|GzZC275|I1RDE2|5518|Gibberella zeae (related: Fusarium graminearum)|Unaffected pathogenicity	P1609_5173
3595 | Ptp1 | PHI:3595 | L7T9I5 | 5207 | Cryptococcus neoformans | mixed outcome	P1609_9701
1288|PHI:1288|FGSG_07812|I1RE83|5518|Gibberella zeae (related: Fusarium graminearum)|Unaffected pathogenicity	P1609_6399
2034|PHI:2034|MFP1|G4MZY1|148305|Magnaporthe oryzae (related: Magnaporthe grisea)|Reduced virulence	P1609_6339
1699|PHI:1699|GzZC014|I1RL94|5518|Gibberella zeae (related: Fusarium graminearum)|Unaffected pathogenicity	P1609_1462
1577|PHI:1577|GzOB017|I1RK79|5518|Gibberella zeae (related: Fusarium graminearum)|Unaffected pathogenicity	P1609_1810
2526|PHI:2526|LUC7|Q4WMR3|746128|Aspergillus fumigatus|Lethal	P1609_4999
1683|PHI:1683|GzRad001|I1RK33|5518|Gibberella zeae (related: Fusarium graminearum)|Lethal	P1609_4741
2025|PHI:2025|HDL1|G4MQZ9|148305|Magnaporthe oryzae (related: Magnaporthe grisea)|Unaffected pathogenicity	P1609_8982
1961|PHI:1961|GzZC276|I1RD74|5518|Gibberella zeae (related: Fusarium graminearum)|Unaffected pathogenicity	P1609_8986
2088|PHI:2088|Moatg27|MGG_02386|148305|Magnaporthe oryzae (related: Magnaporthe grisea)|Unaffected pathogenicity	P1609_8972
1133|PHI:1133|Lmepi|B9DR51|5022|Leptosphaeria maculans|Loss of pathogenicity	P1609_1557
1676|PHI:1676|GzDHHC004|Q4I2M7|5518|Gibberella zeae (related: Fusarium graminearum)|Unaffected pathogenicity	P1609_3325
2529|PHI:2529|ERG10|Q4WCL5|746128|Aspergillus fumigatus|Lethal	P1609_3370
348|PHI:348|CSH3|EAK92385|5476|Candida albicans|Reduced virulence	P1609_8448
1382|PHI:1382|GzC2H045|I1RRX1|5518|Gibberella zeae (related: Fusarium graminearum)|Reduced virulence	P1609_8454
1580|PHI:1580|GzOB020|I1RM35|5518|Gibberella zeae (related: Fusarium graminearum)|Unaffected pathogenicity	P1609_5653
2547|PHI:2547|ESF1|Q4WHH1|746128|Aspergillus fumigatus|Mixed outcome	P1609_7982
1167|PHI:1167|NPC1|I1RY25|5518|Gibberella zeae (related: Fusarium graminearum)|Reduced virulence	P1609_9800
337|PHI:337|CHS7|AAT77184|5507|Fusarium oxysporum|Reduced virulence	P1609_3916
1275|PHI:1275|FGSG_03146|I1S7R2|5518|Gibberella zeae (related: Fusarium graminearum)|Unaffected pathogenicity	P1609_1409
1493|PHI:1493|GzHMG025|I1RUP7|5518|Gibberella zeae (related: Fusarium graminearum)|Unaffected pathogenicity	P1609_9752
1397|PHI:1397|GzC2H060|I1RUQ2|5518|Gibberella zeae (related: Fusarium graminearum)|Unaffected pathogenicity	P1609_3485
423|PHI:423|VAD1|AAV41010|5207|Cryptococcus neoformans|Reduced virulence	P1609_3619
1238|PHI:1238|FGSG_06970|I1S1V3|5518|Gibberella zeae (related: Fusarium graminearum)|Lethal	P1609_1417
786|PHI:786|MGG_04538|EDK05615|318829|Magnaporthe oryzae|Reduced virulence	P1609_318
1462|PHI:1462|GzCCAAT002|I1RC79|5518|Gibberella zeae (related: Fusarium graminearum)|Reduced virulence	P1609_8107
2184|PHI:2184|HTF1|MGG_00184|148305|Magnaporthe oryzae (related: Magnaporthe grisea)|Unaffected pathogenicity	P1609_8123
1799|PHI:1799|GzZC114|I1RBN6|5518|Gibberella zeae (related: Fusarium graminearum)|Unaffected pathogenicity	P1609_7938
1421|PHI:1421|GzC2H089|I1S1A8|5518|Gibberella zeae (related: Fusarium graminearum)|Lethal	P1609_2665
1253|PHI:1253|FGSG_11614|I1RS57|5518|Gibberella zeae (related: Fusarium graminearum)|Unaffected pathogenicity	P1609_10737
1439|PHI:1439|GzNot001|I1RW22|5518|Gibberella zeae (related: Fusarium graminearum)|Lethal	P1609_8873
1646|PHI:1646|GzWing018|I1RW28|5518|Gibberella zeae (related: Fusarium graminearum)|Reduced virulence	P1609_351
1789|PHI:1789|GzZC104|I1RVU7|5518|Gibberella zeae (related: Fusarium graminearum)|Unaffected pathogenicity	P1609_9673
3793 | ANP1 | PHI:3793 | Q6FM27 | 5478 | Candida glabrata | effector (plant avirulence determinant)	P1609_11017
1600|PHI:1600|GzOB041|I1RZK5|5518|Gibberella zeae (related: Fusarium graminearum)|Unaffected pathogenicity	P1609_6308
2066|PHI:2066|MgAtg9|Q51WZ9|148305|Magnaporthe oryzae (related: Magnaporthe grisea)|Loss of pathogenicity, 2077|PHI:2077|Moatg9|MGG_09559|148305|Magnaporthe oryzae (related: Magnaporthe grisea)|Loss of pathogenicity	P1609_6305
2533|PHI:2533|FKS1|Q4WLT4|746128|Aspergillus fumigatus|Lethal	P1609_9753
1570|PHI:1570|GzOB010|I1RE46|5518|Gibberella zeae (related: Fusarium graminearum)|Unaffected pathogenicity	P1609_1375
210|PHI:210|CAP1|AAD42978|5476|Candida albicans|Loss of pathogenicity	P1609_1339
1542|PHI:1542|GzMyb006|I1RE51|5518|Gibberella zeae (related: Fusarium graminearum)|Unaffected pathogenicity	P1609_1337
1616|PHI:1616|GzssDB001|I1RE55|5518|Gibberella zeae (related: Fusarium graminearum)|Unaffected pathogenicity	P1609_1333
443|PHI:443|CBL1||5518|Fusarium graminearum|Reduced virulence	P1609_1804
860|PHI:860|MSP1|AAX07670|318829|Magnaporthe oryzae|Reduced virulence	P1609_1805
1481|PHI:1481|GzHMG013|I1RE60|5518|Gibberella zeae (related: Fusarium graminearum)|Unaffected pathogenicity	P1609_1467
2336|PHI:2336|NIA1|O00101|13684|Stagonospora nodorum (related: Phaeosphaeria nodorum)|Unaffected pathogenicity	P1609_6487
1571|PHI:1571|GzOB011|I1RE76|5518|Gibberella zeae (related: Fusarium graminearum)|Unaffected pathogenicity	P1609_6531
1524|PHI:1524|GzHOMEL033|I1RZF2|5518|Gibberella zeae (related: Fusarium graminearum)|Unaffected pathogenicity	P1609_6423
1377|PHI:1377|GzC2H040|I1RQ34|5518|Gibberella zeae (related: Fusarium graminearum)|Unaffected pathogenicity	P1609_1871
159|PHI:159|URA5|AAC62627|5037|Histoplasma capsulatum|Loss of pathogenicity	P1609_1866
1914|PHI:1914|GzZC229|I1RQ27|5518|Gibberella zeae (related: Fusarium graminearum)|Unaffected pathogenicity	P1609_1862
1670|PHI:1670|GzCCHC010|I1S0Q0|5518|Gibberella zeae (related: Fusarium graminearum)|Unaffected pathogenicity	P1609_6624
1237|PHI:1237|FGSG_01058|I1RZ37|5518|Gibberella zeae (related: Fusarium graminearum)|Lethal	P1609_5720
1599|PHI:1599|GzOB039|I1RZ39|5518|Gibberella zeae (related: Fusarium graminearum)|Unaffected pathogenicity	P1609_5722
888|PHI:888|MGG_01707|EDK04578|318829|Magnaporthe oryzae|Reduced virulence	P1609_1324
1516|PHI:1516|GzHOMEL012|I1RMR8|5518|Gibberella zeae (related: Fusarium graminearum)|Lethal	P1609_1315
2916|PHI:2916|Ppr2|W7M5P0|117187|Fusarium verticillioides|Unaffected pathogenicity	P1609_5258
435|PHI:435|VMA7|EAL02110|5476|Candida albicans|Loss of pathogenicity	P1609_1179
2594|PHI:2594|SET3|Q59ZX1|746128|Aspergillus fumigatus|Mixed outcome	P1609_1181
2515|PHI:2515|ALG7|Q4X146|746128|Aspergillus fumigatus|Lethal	P1609_1182
911|PHI:911|um11451||5270|Ustilago maydis|Reduced virulence	P1609_1051
2215|PHI:2215|BIM1|G4N983|148305|Magnaporthe oryzae (related: Magnaporthe grisea)|Reduced virulence	P1609_3704
200|PHI:200|ARG1|BAB40769|5507|Fusarium oxysporum|Reduced virulence	P1609_4675
2734|PHI:2734| metF|Q97S30|1313|Streptococcus Pneumoniae|Mixed outcome	P1609_1344
3060 | Molrg1 | PHI:3060 | G4MZD0 | 318829 | Magnaporthe oryzae | mixed outcome	P1609_231
2453|PHI:2453|Snt2|D9J222|61369|Fusarium oxysporum f.sp. melonis|Reduced virulence	P1609_11043
1662|PHI:1662|GzCCHC002|I1REJ1|5518|Gibberella zeae (related: Fusarium graminearum)|Unaffected pathogenicity	P1609_7919
2546|PHI:2546|BRX1|Q4WKJ9|746128|Aspergillus fumigatus|Mixed outcome	P1609_9525
1976|PHI:1976|GzZC291|I1RLP8|5518|Gibberella zeae (related: Fusarium graminearum)|Lethal	P1609_11735
1568|PHI:1568|GzOB008|I1RCE1|5518|Gibberella zeae (related: Fusarium graminearum)|Unaffected pathogenicity	P1609_11130
424|PHI:424|PCK1|EAL19243|5207|Cryptococcus neoformans|Reduced virulence	P1609_8396
1615|PHI:1615|GzSGT1|I1RZJ1|5518|Gibberella zeae (related: Fusarium graminearum)|Unaffected pathogenicity	P1609_3425
2399|PHI:2399|Fgp1|I1S5P3|5518|Gibberella zeae (related: Fusarium graminearum)|Reduced virulence	P1609_2280, P1609_578
463|PHI:463|HSP90|AAA02743|4932|Saccharomyces cerevisiae|Increased virulence (Hypervirulence)	P1609_7910
1458|PHI:1458|GzAra006|Q4I7F9|5518|Gibberella zeae (related: Fusarium graminearum)|Unaffected pathogenicity	P1609_1204
1348|PHI:1348|GzC2H008|I1RC07|5518|Gibberella zeae (related: Fusarium graminearum)|Reduced virulence	P1609_1208
464|PHI:464|KIN1|AAB63336|5270|Ustilago maydis|Unaffected pathogenicity	P1609_217
659|PHI:659|Avr1b-1|AAR05401|67593|Phytophthora sojae|Effector (plant avirulence determinant)	P1609_7436
481|PHI:481|KLAP1|AAX14039|27357|Colletotrichum acutatum|Loss of pathogenicity	P1609_3944
1376|PHI:1376|GzC2H039|I1RPM7|5518|Gibberella zeae (related: Fusarium graminearum)|Unaffected pathogenicity	P1609_5964
1177|PHI:1177|(Sc Fpk1)|I1RKH9|5518|Gibberella zeae (related: Fusarium graminearum)|Reduced virulence	P1609_7657
1482|PHI:1482|GzHMG014|I1RKH7|5518|Gibberella zeae (related: Fusarium graminearum)|Unaffected pathogenicity	P1609_7658
1659|PHI:1659|GzCCCH003|I1S245|5518|Gibberella zeae (related: Fusarium graminearum)|Unaffected pathogenicity	P1609_7659
790|PHI:790|MGG_07259|EDK03989|318829|Magnaporthe oryzae|Reduced virulence	P1609_2006
1192|PHI:1192|(Sc Cak1)|I1RLX6|5518|Gibberella zeae (related: Fusarium graminearum)|Reduced virulence	P1609_6096
1531|PHI:1531|GzSsu72|Q4IPC8|5518|Gibberella zeae (related: Fusarium graminearum)|Unaffected pathogenicity	P1609_3281
19|PHI:19|NMT|AAA17547|5207|Cryptococcus neoformans|Reduced virulence	P1609_1974
1539|PHI:1539|GzMyb003|I1RCG0|5518|Gibberella zeae (related: Fusarium graminearum)|Unaffected pathogenicity	P1609_10024
1497|PHI:1497|GzHMG029|I1RZL9|5518|Gibberella zeae (related: Fusarium graminearum)|Reduced virulence	P1609_11084
2601|PHI:2601|Asc1|P83774|746128|Aspergillus fumigatus|Mixed outcome	P1609_11233
1318|PHI:1318|GzBrom003|I1RZM2|5518|Gibberella zeae (related: Fusarium graminearum)|Unaffected pathogenicity	P1609_11234
1753|PHI:1753|GzZC068|I1RZN4|5518|Gibberella zeae (related: Fusarium graminearum)|Unaffected pathogenicity	P1609_12063
1564|PHI:1564|GzOB004|Q4IPZ1|5518|Gibberella zeae (related: Fusarium graminearum)|Unaffected pathogenicity	P1609_8098
1544|PHI:1544|GzMyb008|I1RG68|5518|Gibberella zeae (related: Fusarium graminearum)|Unaffected pathogenicity	P1609_9467
364|PHI:364|MIT1|EAK95175|5476|Candida albicans|Reduced virulence	P1609_6653
2180|PHI:2180|MoTea4|G4N7A0|148305|Magnaporthe oryzae (related: Magnaporthe grisea)|Loss of pathogenicity	P1609_4139
1175|PHI:1175|(Sc Srb10)|I1RKR8|5518|Gibberella zeae (related: Fusarium graminearum)|Reduced virulence	P1609_11852
1688|PHI:1688|GzZC003|I1RWZ1|5518|Gibberella zeae (related: Fusarium graminearum)|Unaffected pathogenicity, 1708|PHI:1708|GzZC023|I1RP73|5518|Gibberella zeae (related: Fusarium graminearum)|Unaffected pathogenicity	P1609_12039
1509|PHI:1509|GzHOME004|I1RRS5|5518|Gibberella zeae (related: Fusarium graminearum)|Unaffected pathogenicity, 2134|PHI:2134|MoHox5|MGG_07437|148305|Magnaporthe oryzae (related: Magnaporthe grisea)|reduced virulence	P1609_7051
3122 | MC69 | PHI:3122 | G5EI17 | 318829 | Magnaporthe oryzae | mixed outcome, 3123 | CoMC69 | PHI:3123 | H7CE70 | 5465 | Colletotrichum orbiculare | effector (plant avirulence determinant)	P1609_2716
1190|PHI:1190|(Sc Pbs2)|I1RWL6|5518|Gibberella zeae (related: Fusarium graminearum)|Reduced virulence	P1609_12913
1022|PHI:1022|XLNR|ABN41464|5508|Fusarium oxysporum|Unaffected pathogenicity, 1740|PHI:1740|GzZC055|I1S791|5518|Gibberella zeae (related: Fusarium graminearum)|Unaffected pathogenicity, 2362|PHI:2362|XlnR|A8QJI7 |426428|Fusarium oxysporum f. sp. lycopersici 4287|Unaffected pathogenicity	P1609_1029
3594 | Ptp2 | PHI:3594 | H6VMG0 | 5207 | Cryptococcus neoformans | mixed outcome	P1609_991
1653|PHI:1653|GzWing026|I1S2A0|5518|Gibberella zeae (related: Fusarium graminearum)|Unaffected pathogenicity	P1609_8931
1982|PHI:1982|GzZC297|I1RIT3|5518|Gibberella zeae (related: Fusarium graminearum)|Unaffected pathogenicity	P1609_5816
1538|PHI:1538|GzMyb002|I1RA07|5518|Gibberella zeae (related: Fusarium graminearum)|Reduced virulence	P1609_7645
3485 | MoSPC3 | PHI:3485 | G4MYT5 | 318829 | Magnaporthe oryzae | loss of pathogenicity	P1609_1684
1843|PHI:1843|GzZC158|I1S4X3|5518|Gibberella zeae (related: Fusarium graminearum)|Unaffected pathogenicity	P1609_7533
1432|PHI:1432|GzC2H100|I1S7Z8|5518|Gibberella zeae (related: Fusarium graminearum)|Unaffected pathogenicity	P1609_518
2104|PHI:2104|Vacuolar calcium ion transporter|MGG_04159|148305|Magnaporthe oryzae (related: Magnaporthe grisea)|Unaffected pathogenicity	P1609_5396
1434|PHI:1434|GzC2H103|I1S8Y5|5518|Gibberella zeae (related: Fusarium graminearum)|Unaffected pathogenicity	P1609_2798
4506 | So (soft) | PHI:4506 | K9Y567 | 35717 | Epichloe festucae | effector (plant avirulence determinant)	P1609_1258
3418 | ssp | PHI:3418 | Q5DPX0 | 29385 | Staphylococcus saprophyticus | mixed outcome	P1609_2607, P1609_2608
1809|PHI:1809|GzZC124|I1REW1|5518|Gibberella zeae (related: Fusarium graminearum)|Lethal	P1609_11380
2079|PHI:2079|Moatg12|MGG_00598|148305|Magnaporthe oryzae (related: Magnaporthe grisea)|Loss of pathogenicity	P1609_8548
190|PHI:190|TEC1|EAL04411|5476|Candida albicans|Reduced virulence	P1609_812
1695|PHI:1695|GzZC010|I1S2I3|5518|Gibberella zeae (related: Fusarium graminearum)|Unaffected pathogenicity	P1609_3572
1952|PHI:1952|GzZC267|I1RDH3|5518|Gibberella zeae (related: Fusarium graminearum)|Unaffected pathogenicity	P1609_7204
2197|PHI:2197|MoRgs6|XP_364773|148305|Magnaporthe oryzae (related: Magnaporthe grisea)|Unaffected pathogenicity	P1609_11537
167|PHI:167|CHIP3|AAF00024|5457|Colletotrichum gloeosporioides|Unaffected pathogenicity	P1609_10248
1426|PHI:1426|GzC2H094|I1S4M4|5518|Gibberella zeae (related: Fusarium graminearum)|Unaffected pathogenicity	P1609_258
3213 | MoCDIP1 | PHI:3213 | G4N8Y3 | 318829 | Magnaporthe oryzae | mixed outcome	P1609_3658
1874|PHI:1874|GzZC189|I1RTS5|5518|Gibberella zeae (related: Fusarium graminearum)|Unaffected pathogenicity	P1609_1349
1880|PHI:1880|GzZC195|I1RJB0|5518|Gibberella zeae (related: Fusarium graminearum)|Unaffected pathogenicity	P1609_9913
538|PHI:538|FRT1|AAU87358|40559|Botrytis cinerea|Unaffected pathogenicity	P1609_988
1454|PHI:1454|GzAra002|I1RCI0|5518|Gibberella zeae (related: Fusarium graminearum)|Unaffected pathogenicity	P1609_10057
2926|PHI:2926|lip3|J9NE50|59765|Fusarium oxysporum f. sp. Lycopersici|Unaffected pathogenicity	P1609_3114
1884|PHI:1884|GzZC199|I1RJ58|5518|Gibberella zeae (related: Fusarium graminearum)|Unaffected pathogenicity	P1609_1531
1052|PHI:1052|PHL1|ACB38886|135779|Cercospora zeae-maydis|Unaffected pathogenicity	P1609_9278
1258|PHI:1258|FGSG_10591|I1S5M8|5518|Gibberella zeae (related: Fusarium graminearum)|Unaffected pathogenicity	P1609_524
1553|PHI:1553|GzMyb017|I1S7F8|5518|Gibberella zeae (related: Fusarium graminearum)|Reduced virulence	P1609_10896
3311 | pcf1 | PHI:3311 | G4NGB1 | 318829 | Magnaporthe oryzae | reduced virulence	P1609_5580
2643|PHI:2643|CFAS|A4HTK3|5671|Leishmania infantum|Reduced virulence	P1609_5370
317|PHI:317|RHBA|AAN17787|5085|Aspergillus fumigatus|Reduced virulence	P1609_7767
323|PHI:323|VFGLU1|AAO63562|93591|Verticillium fungicola|Reduced virulence	P1609_6736
1734|PHI:1734|GzZC049|I1S6Y8|5518|Gibberella zeae (related: Fusarium graminearum)|Unaffected pathogenicity, 2203|PHI:2203|Transcription factor|G4MU26|148305|Magnaporthe oryzae (related: Magnaporthe grisea)|Reduced virulence	P1609_1960
2506|PHI:2506|Amr1|G3F820|29001|Alternaria brassicicola|Increased virulence (Hypervirulence)	P1609_1958
2377|PHI:2377|DEP3|D2E9W8|29001|Alternaria brassicicola|Mixed outcome	P1609_11871
1806|PHI:1806|GzZC121|I1RUM8|5518|Gibberella zeae (related: Fusarium graminearum)|Unaffected pathogenicity	P1609_2700
1468|PHI:1468|GzCCAAT008|Q4HTT1|5518|Gibberella zeae (related: Fusarium graminearum)|Unaffected pathogenicity	P1609_3422
1879|PHI:1879|GzZC194|I1RJB8|5518|Gibberella zeae (related: Fusarium graminearum)|Unaffected pathogenicity	P1609_4948
1336|PHI:1336|GzbZIP018|I1S462|5518|Gibberella zeae (related: Fusarium graminearum)|Unaffected pathogenicity	P1609_11410
3278 | CoIra1 | PHI:3278 | N4V0R3 | 5465 | Colletotrichum orbiculare | reduced virulence	P1609_9475
854|PHI:854|um01947|EAK82380|5270|Ustilago maydis|Reduced virulence	P1609_5948
1389|PHI:1389|GzC2H052|I1RTJ6|5518|Gibberella zeae (related: Fusarium graminearum)|Lethal	P1609_5668
1760|PHI:1760|GzZC075|I1RXP9|5518|Gibberella zeae (related: Fusarium graminearum)|Unaffected pathogenicity	P1609_5005
1986|PHI:1986|GzZC301|I1RA77|5518|Gibberella zeae (related: Fusarium graminearum)|Unaffected pathogenicity	P1609_8290
1477|PHI:1477|GzHMG009|I1RCK8|5518|Gibberella zeae (related: Fusarium graminearum)|Unaffected pathogenicity	P1609_4238
139|PHI:139|CAP10|BAC76819|5207|Cryptococcus neoformans|Reduced virulence	P1609_8671
3126 | argD | PHI:3126 | D4I307 | 552 | Erwinia amylovora | mixed outcome	P1609_8981
872|PHI:872|MGG_03284|EDK00201|318829|Magnaporthe oryzae|Reduced virulence	P1609_3734
1147|PHI:1147|AurR1|Q5UIP5|101028|Fusarium pseudograminearum|Unaffected pathogenicity, 1973|PHI:1973|GIP2|I1RF54|5518|Gibberella zeae (related: Fusarium graminearum)|Unaffected pathogenicity	P1609_13
488|PHI:488|IRS4|EAK93583|5476|Candida albicans|Reduced virulence	P1609_10706
815|PHI:815|MGG_04685|EDJ95941|318829|Magnaporthe oryzae|Reduced virulence	P1609_11204
1958|PHI:1958|GzZC273|I1RMD1|5518|Gibberella zeae (related: Fusarium graminearum)|Unaffected pathogenicity	P1609_1114
810|PHI:810|MGG_02436|EDJ98604|318829|Magnaporthe oryzae|Reduced virulence	P1609_8924
1373|PHI:1373|GzC2H036|I1RN20|5518|Gibberella zeae (related: Fusarium graminearum)|Unaffected pathogenicity	P1609_4260
4575 | NTH2 | PHI:4575 | Q5KEF4 | 5207 | Cryptococcus neoformans | mixed outcome	P1609_865
2543|PHI:2543|GCD6|Q4WLS1|746128|Aspergillus fumigatus|Mixed outcome	P1609_3488
2083|PHI:2083|Moatg17|MGG_07667|148305|Magnaporthe oryzae (related: Magnaporthe grisea)|Loss of pathogenicity	P1609_6892
2216|PHI:2216|PemG1|A0N0D1|148305|Magnaporthe oryzae (related: Magnaporthe grisea)|Effector (plant avirulence determinant)	P1609_10668
242|PHI:242|CaTPS2|CAC17748|5476|Candida albicans|Reduced virulence	P1609_3568
2169|PHI:2169|Conserved hypothetical protein|MGG_06188|148305|Magnaporthe oryzae (related: Magnaporthe grisea)|Reduced virulence	P1609_6384
1623|PHI:1623|GzJUM005|I1S9T2|5518|Gibberella zeae (related: Fusarium graminearum)|Unaffected pathogenicity, 2205|PHI:2205|JmjC domain-containing protein 5 [GH10 family]|MGG_01543|148305|Magnaporthe oryzae (related: Magnaporthe grisea)|Reduced virulence	P1609_1170
1871|PHI:1871|GzZC186|I1RTX0|5518|Gibberella zeae (related: Fusarium graminearum)|Lethal	P1609_2376
886|PHI:886|MGG_13052|EDK06087|318829|Magnaporthe oryzae|Reduced virulence	P1609_12654
1522|PHI:1522|GzHOMEL026|I1RXA5|5518|Gibberella zeae (related: Fusarium graminearum)|Lethal	P1609_10320
874|PHI:874|MGG_00435|EDK02952|318829|Magnaporthe oryzae|Loss of pathogenicity	P1609_8379
3116 | PSPTO_0371 | PHI:3116 | Q88AL8 | 317 | Pseudomonas syringae | mixed outcome	P1609_11485, P1609_2130
1815|PHI:1815|GzZC130|I1RL60|5518|Gibberella zeae (related: Fusarium graminearum)|Unaffected pathogenicity	P1609_10203
2173|PHI:2173|NMR1|MGG_10017|148305|Magnaporthe oryzae (related: Magnaporthe grisea)|Reduced virulence	P1609_12120
2404|PHI:2404|SLP 1|G4N906|148305|Magnaporthe oryzae (related: Magnaporthe grisea)|Reduced virulence	P1609_4371
1908|PHI:1908|GzZC223|I1RHH3|5518|Gibberella zeae (related: Fusarium graminearum)|Unaffected pathogenicity	P1609_3363
2903|PHI:2897|BEC1019|KJ571201.1|62688|Blumeria graminis f. sp. hordei|Effector (plant avirulence determinant)	P1609_3742
1955|PHI:1955|GzZC270|I1RM02|5518|Gibberella zeae (related: Fusarium graminearum)|Unaffected pathogenicity	P1609_5824
1286|PHI:1286|FGSG_03499|I1RUC3|5518|Gibberella zeae (related: Fusarium graminearum)|Unaffected pathogenicity	P1609_101
2628|PHI:2628|spvB|P21454|90371|Salmonella enterica serovar Typhimurium|Reduced virulence, 663|PHI:663|spvB|AAL23530|90371|Salmonella enterica|Reduced virulence	P1609_11600
1499|PHI:1499|GzHMG031|I1S242|5518|Gibberella zeae (related: Fusarium graminearum)|Unaffected pathogenicity	P1609_5112
1774|PHI:1774|GzZC089|I1S3Z9|5518|Gibberella zeae (related: Fusarium graminearum)|Lethal	P1609_7977
2140|PHI:2140|MoVam7|XP_001907727.1|148305|Magnaporthe oryzae (related: Magnaporthe grisea)|Loss of pathogenicity	P1609_7173
3364 | MMAR_1663 | PHI:3364 | B2HHI1 | 1781 | Mycobacterium marinum | reduced virulence	P1609_9122
683|PHI:683|NRG1|ABF69301|5207|Cryptococcus neoformans|Reduced virulence	P1609_6599
3076 | CpATC1 | PHI:3076 | G8BDA6 | 5480 | Candida parapsilosis | mixed outcome	P1609_11388
2375|PHI:2375|DEP1|D2E9W6|29001|Alternaria brassicicola|Mixed outcome	P1609_11869
233|PHI:233|TOXE|AAD13811|5017|Cochliobolus carbonum|Reduced virulence	P1609_5035
1271|PHI:1271|FGSG_00792|I1R9J1|5518|Gibberella zeae (related: Fusarium graminearum)|Unaffected pathogenicity	P1609_5702
15|PHI:15|MPG1|AAA20128|318829|Magnaporthe oryzae|Reduced virulence	P1609_2425
232|PHI:232|STE12a|AAG49739|5207|Cryptococcus neoformans|Reduced virulence	P1609_8970
2210|PHI:2210|endo-1,4-beta-xylanase B [GH10 family]|MGG_08401|148305|Magnaporthe oryzae (related: Magnaporthe grisea)|Reduced virulence	P1609_12150
3309 | cnf2 | PHI:3309 | G4NJD7 | 318829 | Magnaporthe oryzae | mixed outcome	P1609_2904
3343 | nasA | PHI:3343 | B5SDM5 | 305 | Ralstonia solanacearum | reduced virulence	P1609_3768
3483 | MoSPC1 | PHI:3483 | G4N3H3 | 318829 | Magnaporthe oryzae | mixed outcome	P1609_8825
4720 | Iug6 | PHI:4720 | A0A0A7DLN4 | 318829 | Magnaporthe oryzae (related: Magnaporthe grisea) | effector (plant avirulence determinant)	P1609_11595
788|PHI:788|MGG_11742|EDJ97918|318829|Magnaporthe oryzae|Reduced virulence	P1609_7539
818|PHI:818|MGG_11504|EDK02646|318829|Magnaporthe oryzae|Reduced virulence	P1609_8720
879|PHI:879|MGG_13072|EDK06138|318829|Magnaporthe oryzae|Reduced virulence	P1609_10366
2380|PHI:2380|DEP6|D2E9X1|29001|Alternaria brassicicola|Mixed outcome	P1609_11864
4721 | Iug9 | PHI:4721 | A0A0A7DM22 | 318829 | Magnaporthe oryzae (related: Magnaporthe grisea) | effector (plant avirulence determinant)	P1609_9096
