# Supplementary material for: Comparative genomic analysis revealed rapid differentiation in the pathogenicity-related gene repertoires between Pyricularia oryzae and Pyricularia penniseti isolated from a Pennisetum grass
Source: BMC Genomics. 2018 Dec 13;19:927. doi: 10.1186/s12864-018-5222-8 (PMC6293661; doi:10.1186/s12864-018-5222-8)
Supplement: Supplementary file 2 — Table S1. The CAZymes identified in P1609 and other fungi. (XLS 47 kb) [file 12864_2018_5222_MOESM2_ESM.xls]

## Sheet: cazy_stat_1
	P1609	PoOs (70-15)	PgDs	PoEi	PoSv	PoTa	Botrytis_cinerea	Colletotrichum_gloeosporioides	Fusarium_graminearum	Neurospora_crassa	Sclerotinia_sclerotiorum	Trichoderma_reesei	Ustilago_maydis
AA1	1	3	4	4	3	4	6	8	6	5	6	2	2
AA10	0	0	0	0	0	0	0	0	0	0	0	0	1
AA11	8	7	7	7	7	7	2	5	5	4	2	4	0
AA12	4	4	4	4	4	4	0	3	2	3	1	1	0
AA13	1	1	1	1	1	1	1	1	1	1	1	0	0
AA2	10	9	10	10	10	10	4	13	6	6	3	6	3
AA3	24	19	19	19	19	18	28	49	21	9	20	15	10
AA4	2	1	2	1	1	1	4	7	4	3	3	4	1
AA5	5	5	5	5	5	5	6	3	4	2	3	1	4
AA6	1	1	1	1	1	1	1	2	2	1	1	1	1
AA7	47	31	35	34	33	32	32	77	36	18	22	22	6
AA8	5	5	5	5	5	5	4	4	5	2	4	0	0
AA9	24	22	23	25	25	23	10	28	12	14	9	3	0
CBM1	17	18	19	21	21	21	22	18	12	20	19	14	0
CBM10	0	0	0	0	0	0	0	0	0	0	0	0	0
CBM12	0	0	0	0	0	0	0	0	0	0	0	0	0
CBM13	2	2	3	3	3	3	3	3	2	3	3	4	0
CBM16	0	0	0	0	0	0	0	1	4	0	0	0	0
CBM17	0	0	0	0	0	0	0	0	0	0	1	0	0
CBM18	35	25	28	24	25	25	9	14	13	6	12	6	1
CBM19	3	2	2	2	2	2	0	0	0	0	0	0	0
CBM20	3	4	4	4	4	4	5	4	3	4	5	2	0
CBM21	1	1	1	1	1	1	1	1	1	2	1	1	0
CBM22	0	0	0	0	0	0	0	0	3	0	0	0	0
CBM23	0	1	1	1	1	1	0	0	0	0	0	0	0
CBM24	0	0	0	0	0	0	7	5	2	5	6	2	0
CBM32	1	1	1	1	1	1	2	1	2	1	0	1	0
CBM35	2	2	2	2	2	2	2	7	2	0	1	0	1
CBM37	0	0	0	0	0	0	1	0	0	0	1	0	0
CBM38	0	0	0	0	0	0	0	0	0	1	0	0	0
CBM4	0	0	0	0	0	0	0	0	0	0	0	0	1
CBM40	1	1	2	1	1	1	0	1	0	0	0	0	0
CBM42	2	2	2	2	2	2	1	1	1	1	1	2	0
CBM43	2	2	2	2	2	2	1	1	1	1	1	2	1
CBM44	0	0	0	0	0	0	0	0	0	0	0	0	0
CBM46	0	0	0	0	0	0	1	1	0	0	1	0	0
CBM48	1	1	1	1	1	1	2	1	2	3	2	1	1
CBM50	14	8	10	12	9	12	3	23	7	6	6	7	2
CBM51	0	0	0	0	0	0	1	0	0	0	0	0	0
CBM52	1	1	1	1	1	1	0	0	0	1	0	0	0
CBM6	2	2	2	2	2	2	0	2	1	0	0	0	0
CBM61	2	0	0	0	0	0	1	0	5	0	2	0	0
CBM63	1	1	1	1	1	1	1	3	3	0	1	0	1
CBM66	1	1	1	1	1	1	1	1	0	0	0	2	0
CBM67	2	1	2	1	0	1	3	9	4	0	1	0	0
CBM69	0	0	0	0	0	0	0	0	1	0	0	0	0
CBM72	0	0	0	0	0	0	1	0	0	0	0	0	0
CBM78	0	0	0	0	0	0	0	0	0	0	0	0	0
CE1	26	28	27	28	29	28	17	26	20	17	13	13	12
CE10	59	47	49	48	48	47	69	101	61	31	42	30	31
CE12	3	3	3	3	3	3	5	7	5	2	5	2	0
CE13	0	0	0	0	0	0	0	0	0	0	0	0	2
CE14	1	1	1	1	1	1	1	0	1	1	1	2	1
CE15	1	1	1	1	1	1	0	2	0	1	1	1	0
CE16	2	2	2	2	2	2	7	10	5	2	6	2	0
CE2	1	3	1	2	3	2	2	1	1	1	1	0	0
CE3	8	7	7	8	8	7	3	14	8	4	3	2	0
CE4	12	12	12	12	11	12	6	17	9	5	5	4	8
CE5	15	19	17	18	18	18	11	16	12	3	8	4	4
CE7	0	0	0	0	0	0	2	0	0	0	1	1	0
CE8	2	1	2	2	2	3	5	5	3	2	5	0	1
CE9	1	1	1	1	1	1	2	1	1	1	2	1	1
GH1	2	2	2	2	2	2	5	4	3	2	3	2	0
GH10	5	6	6	6	6	6	2	7	5	4	2	1	2
GH105	3	3	3	3	2	2	2	6	3	2	1	2	2
GH106	1	1	1	1	1	1	2	6	1	0	1	1	0
GH108	0	0	0	0	0	0	0	0	0	1	0	0	0
GH109	7	8	7	8	8	8	6	29	15	4	6	9	6
GH11	5	5	4	5	4	5	3	5	2	2	3	3	1
GH114	1	1	1	1	1	1	1	1	2	1	1	0	0
GH115	3	3	3	3	3	3	1	3	2	1	1	1	1
GH117	1	0	0	0	0	0	1	0	0	0	0	0	0
GH12	3	3	3	3	3	3	5	7	4	2	4	2	0
GH121	0	0	0	0	0	0	0	0	1	1	0	0	0
GH125	4	4	4	4	4	4	3	3	3	3	3	2	1
GH127	1	2	2	1	2	1	1	5	2	0	0	1	0
GH128	5	5	6	5	5	5	4	3	4	4	3	4	5
GH13	9	10	10	10	10	10	9	12	7	10	9	4	3
GH131	6	6	6	6	6	6	3	8	1	3	2	0	0
GH132	2	2	2	2	2	2	3	2	2	2	0	2	0
GH133	1	1	1	1	1	1	1	1	1	1	1	1	1
GH134	0	0	0	0	0	0	0	0	0	0	0	0	0
GH135	1	1	1	1	1	1	4	1	0	1	3	0	1
GH15	2	2	2	2	2	2	4	3	3	2	4	2	1
GH16	19	18	19	19	17	19	22	25	23	15	19	16	21
GH17	5	7	4	7	7	8	6	6	4	5	6	4	2
GH18	29	15	17	16	17	15	9	24	18	13	14	19	4
GH2	9	8	8	7	8	7	2	10	10	6	2	7	1
GH20	3	3	3	3	3	3	1	4	3	2	1	3	2
GH23	0	0	0	0	0	0	1	0	0	0	1	1	1
GH24	1	1	1	1	1	1	0	0	0	0	0	1	0
GH25	0	0	0	0	0	0	1	0	0	1	1	1	1
GH26	0	0	0	0	0	0	2	1	0	1	1	0	1
GH27	4	3	2	3	3	3	4	5	2	0	3	5	1
GH28	6	3	3	3	3	3	19	22	6	2	16	4	1
GH29	4	4	3	4	4	4	0	2	1	0	0	0	0
GH3	20	18	18	18	17	18	15	29	21	10	13	13	3
GH30	1	1	1	1	1	1	0	2	0	2	0	5	2
GH31	7	6	5	6	6	6	5	8	8	6	6	4	3
GH32	3	4	3	4	4	4	2	2	6	2	1	0	2
GH33	1	1	1	1	1	1	0	2	1	0	0	0	0
GH35	1	0	0	0	0	0	4	8	3	2	4	1	1
GH36	0	0	0	0	0	0	0	1	2	0	0	1	0
GH37	2	2	2	2	2	2	1	1	2	2	1	2	2
GH38	2	2	2	2	2	2	2	2	1	1	1	1	2
GH39	2	1	1	1	1	1	0	1	0	0	0	1	0
GH4	0	0	0	0	0	0	0	0	0	0	0	0	0
GH42	0	0	0	0	0	0	0	0	0	0	0	0	1
GH43	24	19	18	19	19	19	8	40	17	7	5	3	2
GH45	1	1	1	1	1	1	2	1	1	1	2	1	3
GH47	9	9	9	9	8	9	9	11	10	9	8	8	3
GH49	0	0	0	0	0	0	0	0	0	0	0	0	0
GH5	14	13	14	12	13	13	15	22	13	6	14	8	12
GH51	3	3	3	3	3	3	2	3	2	1	2	0	2
GH53	1	1	1	1	1	2	2	2	1	1	2	0	0
GH54	1	1	1	1	1	1	1	1	1	1	1	2	0
GH55	7	4	4	4	4	4	5	6	3	6	4	6	1
GH6	3	3	3	3	3	3	1	4	1	3	1	1	0
GH62	2	4	2	2	2	4	1	1	1	0	0	1	1
GH63	3	1	1	1	1	1	1	1	1	2	1	2	1
GH64	2	2	2	2	2	2	2	1	2	2	2	3	0
GH65	1	0	1	1	1	1	2	1	0	0	1	2	0
GH67	1	1	1	1	1	1	0	1	1	1	0	1	0
GH7	7	6	6	6	6	6	3	7	2	5	3	2	0
GH71	1	1	1	1	1	1	8	8	0	7	8	4	0
GH72	5	5	5	5	5	5	6	4	3	5	6	5	1
GH73	0	0	0	0	0	0	0	0	1	0	0	0	0
GH74	2	2	2	2	2	2	1	4	2	2	1	2	1
GH75	1	1	1	0	0	0	0	1	1	1	0	3	0
GH76	9	8	8	8	8	8	12	10	7	10	12	8	1
GH78	2	3	5	4	2	4	7	19	7	2	4	1	0
GH79	3	2	3	2	2	2	2	5	1	2	2	4	1
GH8	0	0	0	0	0	0	0	0	0	0	0	0	1
GH81	1	2	2	3	3	3	1	2	1	1	1	2	0
GH85	0	0	0	0	0	0	0	0	0	0	0	0	1
GH88	1	1	1	1	1	1	1	4	1	0	0	0	0
GH89	0	0	0	0	0	0	1	0	0	0	1	2	0
GH9	0	0	0	0	0	0	0	0	0	1	0	0	1
GH92	6	6	6	6	6	6	5	6	0	2	5	7	3
GH93	1	1	1	1	1	1	1	4	2	2	1	0	0
GH94	1	1	1	1	1	1	0	0	0	1	0	0	0
GH95	1	1	1	1	1	1	3	6	3	0	2	4	0
GH99	0	0	0	0	0	0	0	0	0	0	0	2	0
GT1	10	11	10	10	9	8	11	18	12	6	7	5	3
GT15	4	4	4	4	4	4	4	5	3	5	4	4	2
GT17	1	1	1	1	1	1	2	2	1	1	2	1	1
GT2	11	10	11	12	13	11	19	15	12	11	16	9	9
GT20	3	3	3	3	3	3	4	2	3	3	3	4	3
GT21	4	2	3	3	2	2	1	1	1	1	1	3	1
GT22	3	4	4	4	4	4	4	4	4	4	3	4	4
GT23	0	0	1	0	0	0	0	0	0	0	0	0	0
GT24	1	1	1	1	1	1	1	1	1	1	1	1	1
GT25	6	8	6	7	6	8	2	2	0	2	3	1	0
GT26	0	0	0	0	0	0	1	1	1	0	0	0	0
GT28	1	1	1	1	1	1	1	1	1	2	1	1	1
GT3	1	1	1	1	1	1	1	1	1	4	1	1	1
GT31	3	2	2	3	3	3	3	3	2	2	2	4	3
GT32	11	10	13	13	14	12	9	9	6	4	5	11	2
GT33	1	1	1	1	1	1	1	1	1	1	1	1	1
GT34	2	2	2	2	2	2	2	3	4	3	2	3	0
GT35	1	1	1	1	1	1	1	1	1	1	1	1	0
GT39	3	3	3	3	3	3	3	3	3	4	3	3	3
GT4	4	4	4	4	4	4	6	5	5	6	5	5	4
GT41	1	1	1	1	1	1	0	0	1	1	0	1	0
GT45	0	0	0	0	0	0	0	0	0	0	0	0	0
GT48	1	1	1	1	1	1	1	1	1	1	1	1	1
GT5	1	1	1	1	1	1	1	2	0	2	1	0	0
GT50	1	1	1	1	1	1	1	1	1	1	2	1	1
GT54	0	0	0	0	0	0	0	0	1	0	0	0	0
GT55	1	1	1	0	0	1	0	1	0	1	0	0	0
GT57	2	2	2	2	2	2	2	1	2	2	1	2	2
GT58	1	1	1	1	1	1	1	1	1	1	0	1	1
GT59	1	1	1	1	1	1	1	1	1	1	1	1	1
GT62	3	3	3	3	3	3	3	3	3	3	3	3	0
GT64	0	0	0	0	0	0	0	0	2	0	0	2	0
GT65	0	0	0	0	0	0	0	0	0	1	0	0	0
GT66	1	1	1	1	1	1	1	1	1	1	1	1	1
GT68	0	0	0	0	0	0	3	0	0	0	2	0	0
GT69	4	4	3	4	4	4	3	5	1	2	2	4	3
GT71	3	4	4	5	4	4	5	5	4	1	2	1	2
GT76	1	1	1	1	1	1	1	1	1	1	1	1	1
GT77	0	0	0	0	0	0	0	0	1	1	0	0	0
GT8	2	2	2	2	2	2	7	6	6	4	5	3	2
GT81	0	0	0	0	0	0	0	0	0	0	0	0	0
GT83	1	0	0	0	0	0	0	1	0	0	0	0	0
GT84	0	0	0	0	0	0	0	0	0	0	0	0	0
GT90	6	7	7	6	7	7	5	5	6	5	5	6	5
GT92	0	0	0	0	0	0	1	0	0	0	1	0	0
PL1	2	2	2	2	1	2	7	18	9	1	4	0	1
PL10	0	0	0	0	0	0	0	1	0	0	0	0	0
PL11	0	0	0	0	0	0	0	1	0	0	0	0	0
PL12	0	0	0	0	0	0	0	0	0	0	0	0	1
PL17	0	0	0	0	0	0	0	0	0	0	0	0	0
PL20	1	1	1	1	1	1	0	1	1	1	0	2	0
PL22	0	0	0	0	0	0	1	0	1	0	0	0	0
PL24	1	0	0	0	0	0	1	1	0	0	0	0	0
PL3	1	1	1	1	1	1	2	13	7	1	0	0	0
PL4	1	1	1	1	1	1	0	7	3	1	0	0	0
PL7	0	0	0	0	0	0	1	0	0	0	1	2	0
PL8	0	0	0	0	0	0	0	0	0	0	0	1	0
PL9	0	0	0	0	0	0	0	3	1	0	0	0	0
Family Num	146	142
Gene Num	756	678	692	697	687	692	678	1091	673	483	552	470	267
Unique	5	1
